# Supplementary material for: An HFIP-assisted, cobalt-catalyzed three-component electrophilic C–H amination/cyclization/directing group removal cascade to naphtho[1,2-d]imidazoles
Source: Royal Society of Chemistry journal article supplement (doi:10.1039/d3cc00749a), 2023-01-01

## Electronic Supplementary Information

### **HFIP-assisted, cobalt-catalyzed three-component electrophilic C–H amination/cyclization/directing group removal cascade to naphtho[1,2-*d*]imidazoles**

Hasina Mamataj Begam,<sup>a</sup> Kangkan Pradhan,<sup>a,b</sup> Kasarla Varalaxmi<sup>a,c</sup> and Ranjan Jana<sup>\*a,b</sup>

<sup>a</sup>Organic and Medicinal Chemistry Division, CSIR-Indian Institute of Chemical Biology

4 Raja S. C. Mullick Road, Jadavpur, Kolkata-700032, West Bengal, India

<sup>b</sup>Academy of Scientific and Innovative Research (AcSIR), Ghaziabad-201 002, Uttar Pradesh, India

<sup>c</sup>Medicinal Chemistry, National Institute of Pharmaceutical Education and Research (NIPER), Kolkata, West Bengal, India

E-mail: rjana@iicb.res.in

## Table of Contents

|                                                                      |       |
|----------------------------------------------------------------------|-------|
| General information.....                                             | 2     |
| Preparation of starting materials.....                               | 2     |
| Representative procedures for the main reaction.....                 | 3     |
| Control experiments.....                                             | 3-6   |
| Product derivatizations.....                                         | 6     |
| Procedures for product derivatizations.....                          | 7-8   |
| Crystal structure.....                                               | 8-11  |
| Spectral data.....                                                   | 11-27 |
| References.....                                                      | 27    |
| <sup>1</sup> H, <sup>13</sup> C and <sup>19</sup> F NMR spectra..... | 28-64 |

**General Information:** Air-sensitive reagents were handled under a dry nitrogen atmosphere. Unless otherwise stated, all commercial reagents were used without additional purification. Solvents were dried using standard methods and distilled before use. TLC was performed on silica gel plates (Merck silica gel 60, f<sub>254</sub>), and the spots were visualized with UV light (254 and 365 nm) or by charring the plate dipped in KMnO<sub>4</sub> or vanillin charring solution. <sup>1</sup>H NMR spectra were recorded at 400 MHz (JEOL-JNM-ECZ400S/L1), <sup>13</sup>C NMR spectra were recorded at 100 MHz (JEOL-JNM-ECZ400S/L1) and <sup>19</sup>F NMR spectra were recorded at 376 MHz (JEOL-JNM-ECZ400S/L1) frequency in CDCl<sub>3</sub> or DMSO-d<sub>6</sub> solvent using TMS as the internal standard. Chemical shifts were measured in parts per million (ppm) referenced to 0.0 ppm for tetramethylsilane. The following abbreviations were used to explain multiplicities: s = singlet, d = doublet, t = triplet, q = quartet, m = multiplet, br. = broad, dt = doublet of triplet, td = triplet of doublet, dd = doublet of doublet. Coupling constants, *J* were reported in Hertz unit (Hz). HRMS (m/z) were measured using ESI technique (Q-ToF Micro mass spectrometer). Crystals were grown in dichloromethane and crystal data was recorded in (Bruker Kappa Apex-2, CCD Area Detector) instrument.

### Preparation of starting materials:

Starting materials are prepared according to our previous method.<sup>1</sup>

### Representative Procedure for imidazole:

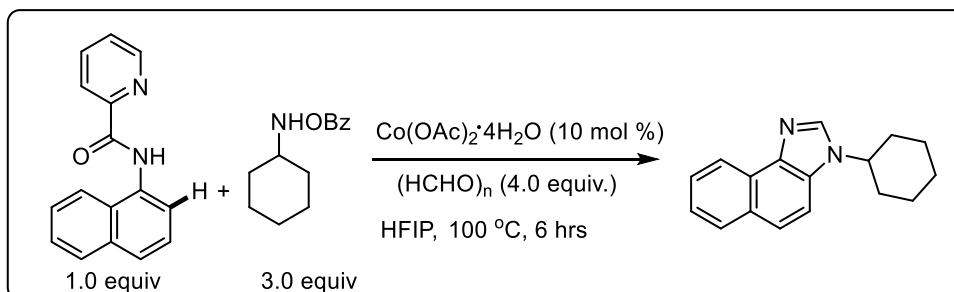

In an oven dried 15 mL sealed tube containing a stir bar was added corresponding picolinamide (0.3 mmol, 1.0 equiv.), *O*-benzoylhydroxylamine (0.9 mmol, 3.0 equiv.), (HCHO)<sub>n</sub> (36 mg, 1.2 mmol, 4.0 equiv.) and Co(OAc)<sub>2</sub>·4H<sub>2</sub>O (0.03 mmol). HFIP (3 mL) was then added. The mixture was stirred at 100 °C for 6 hrs. After allotted time the reaction mixture was cooled to room temperature. The mixture was diluted with DCM (50 mL) and washed with saturated aq. NaHCO<sub>3</sub> or NaOH solution (25mL), followed by brine solution (25 mL) and dried over anhydrous Na<sub>2</sub>SO<sub>4</sub>, and evaporated in *vacuo*. The crude mixture was loaded on a silica gel column chromatography and purified using (Hexane/Acetone) to give the desired imidazole product.

[**N.B.** During this whole process EtOAc can't be used because it is hydrolyzed by the imidazole product generating AcOH which can't be removed by simple rotary evaporation.]

### Control experiments:

To gain insight into the mechanism some control experiments were performed. When the pre-formed *ortho* amino picolinamide was subjected to react with paraformaldehyde in presence or absence of Co-catalyst the product was obtained in 80% and 67% yield respectively in 6 hrs. This indicates that cobalt catalyst may have slight assistance in the subsequent reaction after amination. Though benzamide (**5**) didn't afford the desired product, the *ortho* amino benzamide of naphthylamine (**6**) successfully furnished the product in 82% yield. These experiments suggest that the pyridine N-atom is necessary for C-H amination step but for the subsequent reactions it is not required. Then to check the solvent effect in both C-H amination as well as next cyclization cascade, we performed the main reaction and also from intermediate **1a'** in various mixed solvents.

Enhanced yield of the desired product in presence of HFIP in both cases suggests that HFIP has role in the whole process. When the substrate was treated with 1.0 equiv. of  $\text{Co}(\text{OAc})_2 \cdot 4\text{H}_2\text{O}$  in HFIP, substrate is found to be consumed with the formation of an orange-coloured complex which was isolated by column chromatography and electrospray ionization mass spectrometry (ESI-MS)

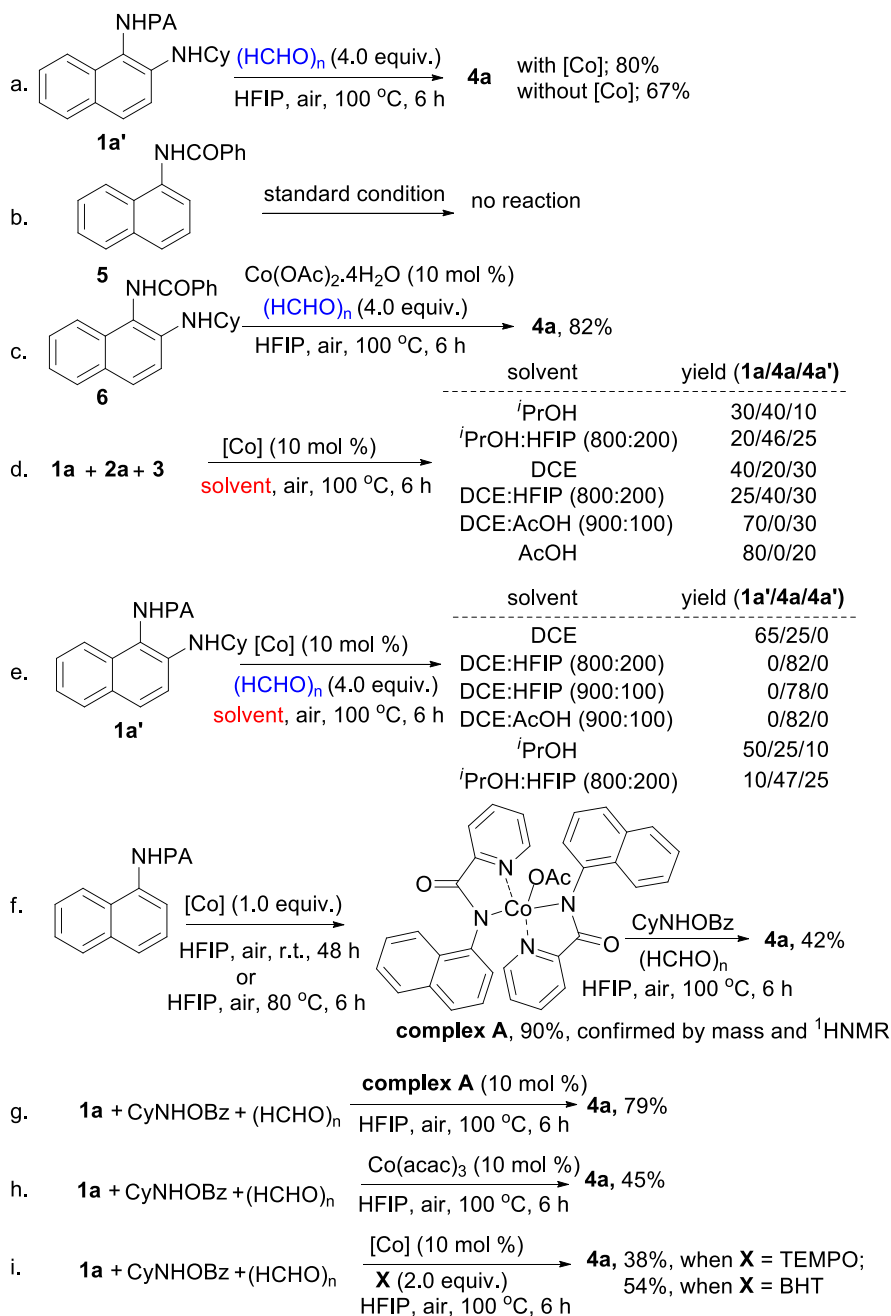

as well as  $^1\text{HNMR}$  confirms the formation of complex **A**. This complex is formed only in HFIP and other solvent systems found ineffective for this complex formation. When this complex was

treated with amine source and  $(\text{HCHO})_n$ , the product was obtained in 42% yield with the recovery of **1a**. Also, it is evident from reaction **e** that after amination HFIP is acting as acid and probably facilitating the iminium formation. When **1a** was treated under standard conditions with **2a** and **3** using 10 mol % of this complex instead of  $\text{Co}(\text{OAc})_2 \cdot 4\text{H}_2\text{O}$  79% of the desired product was obtained. So, this indicates that this Co(III)-complex may be an intermediate in this reaction.  $\text{Co}(\text{acac})_3$  was also able to furnish the product in 45% yield. Since Co(III) salt is giving the product in good amount so we may assume that our reaction may be undergoing through initial oxidation of Co(II) to Co(III). When standard reactions were performed in presence of stoichiometric amounts of radical quenchers such as TEMPO or BHT product formation was inhibited slightly but not significantly. From this experiment we may think that probably the reaction is not going through any radical intermediate.

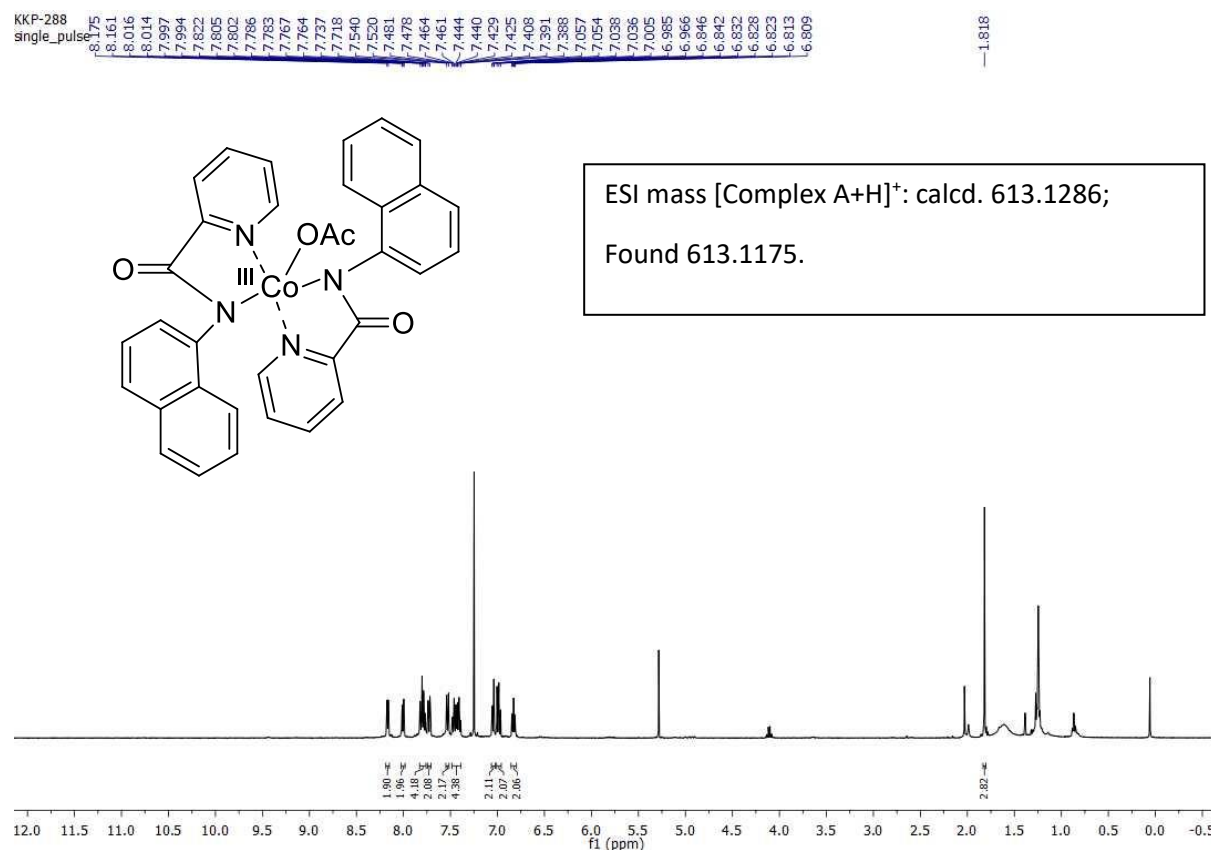

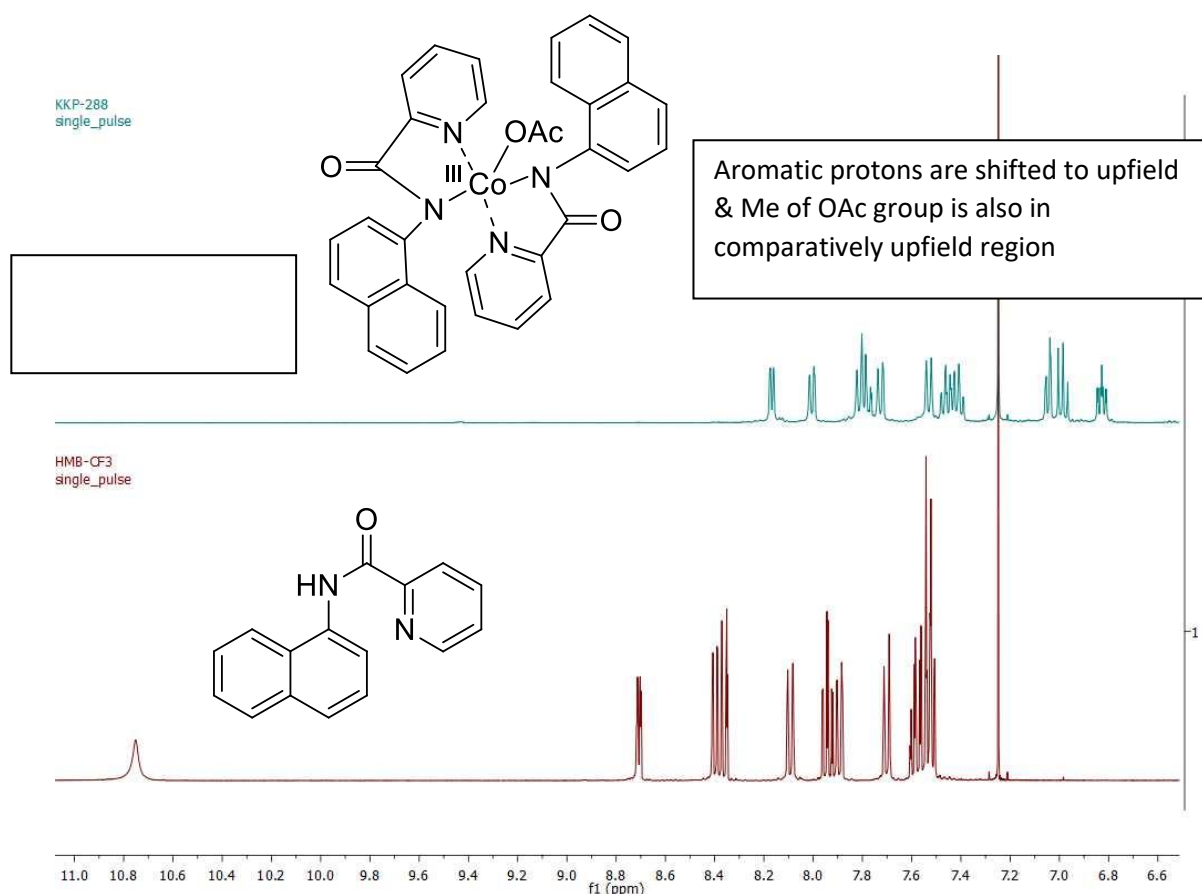

### Product derivatization:

a. Late-stage C<sub>2</sub>-H functionalisation

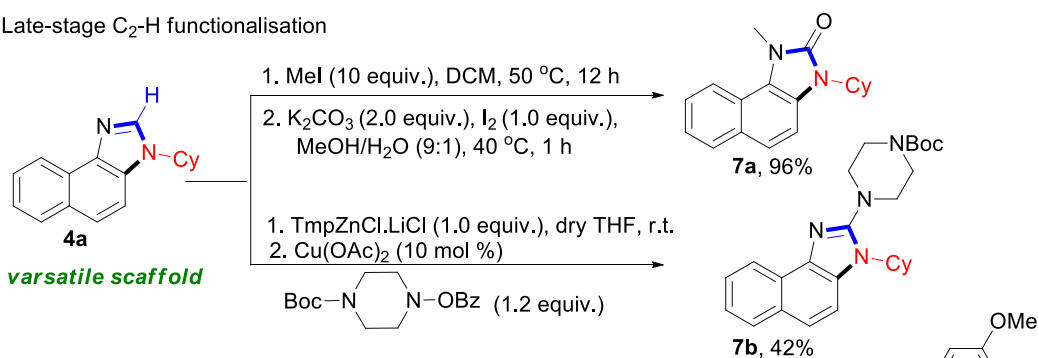

b. Synthesis of **Tomoxiprole**, a COX-2 inhibitor

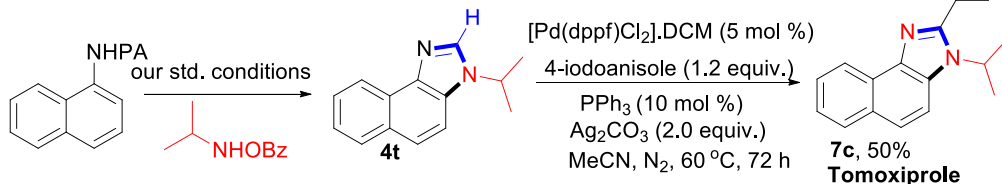

The imidazole product formed by our method is further utilized for the synthesis of naphthimidazolone (**7a**) and 2-amino naphthimidazole (**7b**). A COX-2 inhibitor

Tomoxiprole has also been synthesized by C<sub>2</sub>-H arylation of compound **4t**, prepared by our method (**7c**).

**Procedure for C<sub>2</sub>-H oxidation:**

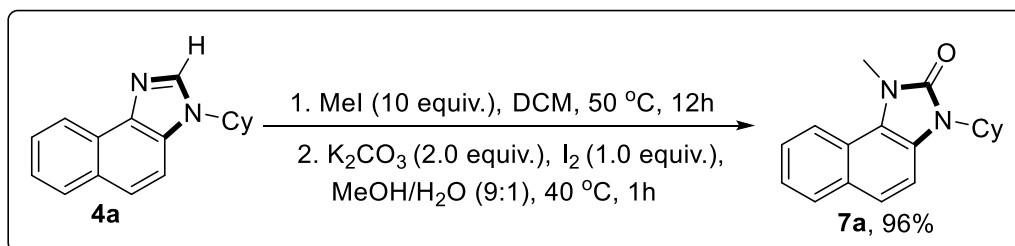

C<sub>2</sub>-H oxidation was performed following a previous method under slightly changed condition.<sup>2</sup> In an oven dried R.B. containing a stir bar charged with **4a** (0.5 mmol) in DCM was added MeI (10 equiv.). Then the mixture fitted with reflux condenser was heated at 50 °C for 12 hrs. After cooling to room temperature the solvent was evaporated under rotary evaporation. To this K<sub>2</sub>CO<sub>3</sub> (2.0 equiv.), I<sub>2</sub> (1.0 equiv.) and MeOH/H<sub>2</sub>O (9:1) 3 mL were added and heated to 40 °C for 1 h). After cooling to room temperature the solvent was evaporated. 50 mL EtOAc was added to it and washed with water and dried over anhydrous Na<sub>2</sub>SO<sub>4</sub>, and evaporated in *vacuo*. The crude mixture was loaded on a silica gel column chromatography and purified using (Hexane/EtOAc) to give the desired imidazolone product.

**Procedure for C<sub>2</sub>-H amination:**

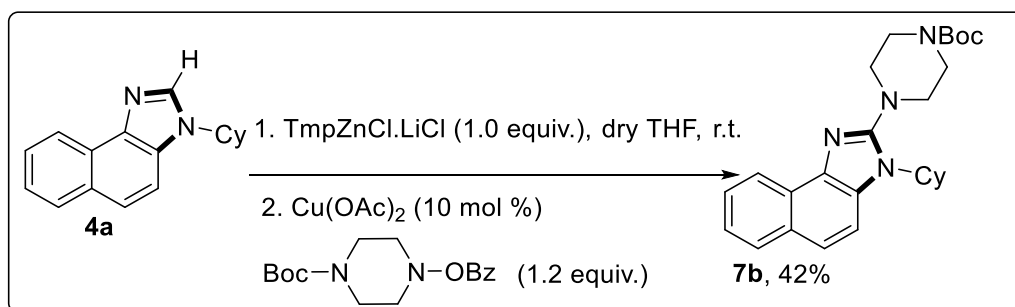

C<sub>2</sub>-H amination was performed following a previous method under slightly changed condition.<sup>3</sup> In an oven dried R.B. containing a stir bar and charged with **4a** (0.5 mmol) in dry THF under Ar atmosphere was added TmpZnCl.LiCl in THF solution (1.0 equiv.) dropwise and stirred at room temperature for 30 minutes. After that a mixture of Cu(OAc)<sub>2</sub> (10 mol%), the amine-OBz (1.2 equiv.) in dry THF under Ar atmosphere was added dropwise to the previous mixture at room

temperature and stirred at r.t. for 12 hrs. After this time the reaction was quenched with saturated  $\text{NH}_4\text{Cl}$  solution. Then after solvent evaporation EtOAc was added and washed with water dried over anhydrous  $\text{Na}_2\text{SO}_4$ , and evaporated in *vacuo*. The crude mixture was loaded on a silica gel column chromatography and purified using (Hexane/EtOAc) to give the desired product.

### Procedure for the synthesis of Tomoxiprole:

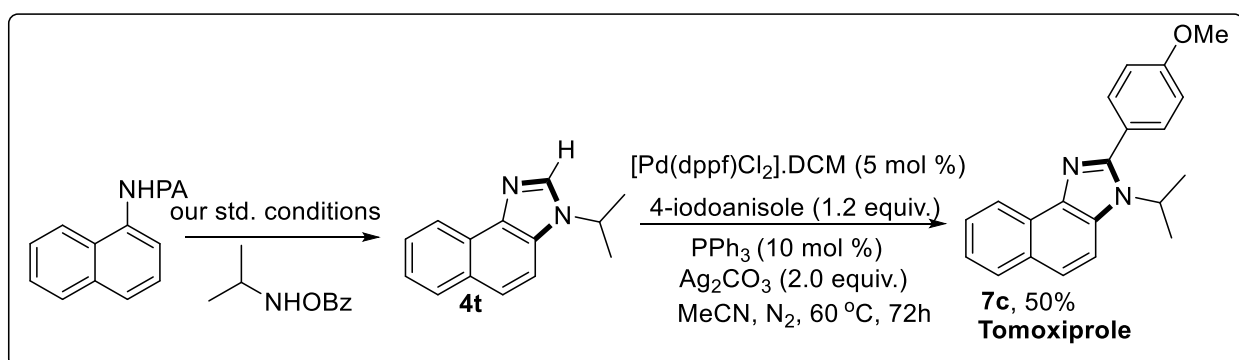

**4t** was prepared following our method. C2-H arylation was performed following a previous method.<sup>4</sup> An oven dried reaction vial containing a stir bar and charged with **4t** (0.5 mmol) was added  $[\text{Pd}(\text{dppf})\text{Cl}_2] \cdot \text{DCM}$  (5 mol %),  $\text{PPh}_3$  (10 mol %), 4-iodoanisole (1.2 equiv.),  $\text{Ag}_2\text{CO}_3$  (2.0 equiv.) and then MeCN (4 mL) was added. Then the mixture was heated to 60 °C for 72 hrs. After the allotted time the mixture was cooled to room temperature and filtered through celite pad. Then crude obtained after the solvent evaporation was purified by silica gel column chromatography using (Hexane/EtOAc) to give the desired product.

### Crystal structure:

The crystals were grown in dichloromethane solvent. The pure compound was dissolved in dichloromethane slow evaporation led to the crystal **4a**. The crystal data was collected in X-ray spectroscopy (Bruker Kappa Apex-2, CCD Area Detector), and the data was analyzed using OLEX2 software. The structure is given below. The corresponding cif file has been uploaded separately as supporting information.

Thermal ellipsoid plot of **4a**. Ellipsoids are represented with 50% probability.

X-ray determined molecular structure of **4a**, CCDC: 2220979

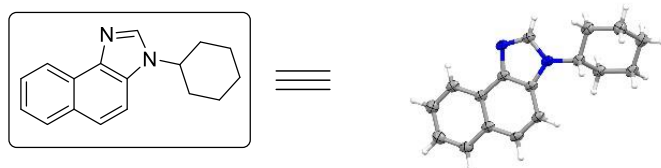



|                                      |                                                               |
|--------------------------------------|---------------------------------------------------------------|
| Identification code                  | HM1418                                                        |
| Empirical formula                    | C <sub>17</sub> H <sub>18</sub> N <sub>2</sub>                |
| Formula weight                       | 250.33                                                        |
| Temperature/K                        | 100.0                                                         |
| Crystal system                       | monoclinic                                                    |
| Space group                          | P2 <sub>1</sub> /c                                            |
| a/Å                                  | 13.2417(9)                                                    |
| b/Å                                  | 12.7619(9)                                                    |
| c/Å                                  | 7.8090(5)                                                     |
| α/°                                  | 90                                                            |
| β/°                                  | 99.428(3)                                                     |
| γ/°                                  | 90                                                            |
| Volume/Å <sup>3</sup>                | 1301.81(15)                                                   |
| Z                                    | 4                                                             |
| ρ <sub>calc</sub> /g/cm <sup>3</sup> | 1.277                                                         |
| μ/mm <sup>-1</sup>                   | 0.580                                                         |
| F(000)                               | 536.0                                                         |
| Crystal size/mm <sup>3</sup>         | 0.15 × 0.12 × 0.02                                            |
| Radiation                            | Cu Kα (λ = 1.54178)                                           |
| 2θ range for data collection/°       | 9.688 to 144.96                                               |
| Index ranges                         | -16 ≤ h ≤ 15, -15 ≤ k ≤ 15, -8 ≤ l ≤ 9                        |
| Reflections collected                | 25331                                                         |
| Independent reflections              | 2532 [R <sub>int</sub> = 0.0811, R <sub>sigma</sub> = 0.0436] |
| Data/restraints/parameters           | 2532/0/173                                                    |
| Goodness-of-fit on F <sup>2</sup>    | 1.071                                                         |

Final R indexes [ $I \geq 2\sigma(I)$ ]  $R_1 = 0.0672$ ,  $wR_2 = 0.1766$

Final R indexes [all data]  $R_1 = 0.0699$ ,  $wR_2 = 0.1801$

Largest diff. peak/hole /  $e \text{ \AA}^{-3}$  0.46/-0.37

The crystals were grown in dichloromethane solvent. The pure compound was dissolved in dichloromethane slow evaporation led to the crystal **4ac**. The crystal data was collected in X-ray spectroscopy (Bruker Kappa Apex-2, CCD Area Detector), and the data was analyzed using OLEX2 software. The structure is given below. The corresponding cif file has been uploaded separately as supporting information.

Thermal ellipsoid plot of **4ac**. Ellipsoids are represented with 50% probability.

X-ray determined molecular structure of **4ac**, CCDC: 2220977

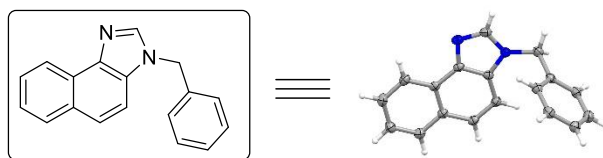

|                        |                   |
|------------------------|-------------------|
| Identification code    | HM1804_2_0m       |
| Empirical formula      | $C_{18}H_{14}N_2$ |
| Formula weight         | 258.31            |
| Temperature/K          | 100.00            |
| Crystal system         | monoclinic        |
| Space group            | $P2_1/n$          |
| $a/\text{\AA}$         | 6.5843(3)         |
| $b/\text{\AA}$         | 9.6121(4)         |
| $c/\text{\AA}$         | 20.5866(8)        |
| $\alpha/^\circ$        | 90                |
| $\beta/^\circ$         | 93.7440(10)       |
| $\gamma/^\circ$        | 90                |
| Volume/ $\text{\AA}^3$ | 1300.12(9)        |
| Z                      | 4                 |

|                                                |                                                               |
|------------------------------------------------|---------------------------------------------------------------|
| $\rho_{\text{calc}}/\text{g}/\text{cm}^3$      | 1.320                                                         |
| $\mu/\text{mm}^{-1}$                           | 0.607                                                         |
| F(000)                                         | 544.0                                                         |
| Crystal size/ $\text{mm}^3$                    | $0.15 \times 0.12 \times 0.02$                                |
| Radiation                                      | CuK $\alpha$ ( $\lambda = 1.54178$ )                          |
| 2 $\Theta$ range for data collection/ $^\circ$ | 8.608 to 144.446                                              |
| Index ranges                                   | $-7 \leq h \leq 8, -11 \leq k \leq 11, -25 \leq l \leq 24$    |
| Reflections collected                          | 23131                                                         |
| Independent reflections                        | 2472 [ $R_{\text{int}} = 0.0487, R_{\text{sigma}} = 0.0328$ ] |
| Data/restraints/parameters                     | 2472/0/181                                                    |
| Goodness-of-fit on $F^2$                       | 1.064                                                         |
| Final R indexes [ $I \geq 2\sigma(I)$ ]        | $R_1 = 0.0422, wR_2 = 0.1115$                                 |
| Final R indexes [all data]                     | $R_1 = 0.0432, wR_2 = 0.1125$                                 |
| Largest diff. peak/hole / $e \text{ \AA}^{-3}$ | 0.20/-0.17                                                    |

## Spectral data

### 3-cyclohexyl-3*H*-naphtho[1,2-*d*]imidazole (4a)

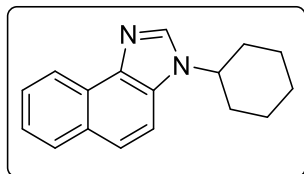

The general procedure for imidazole was followed. Column chromatography (SiO<sub>2</sub>, eluting with 90:10 hexane/acetone) afforded the desired product as a white solid (66 mg, 88% yield); mp: 148-150 °C. <sup>1</sup>H NMR (400 MHz, CDCl<sub>3</sub>):  $\delta$  8.65-8.63 (m, 1H), 8.03 (s, 1H), 7.92 (d,  $J = 8.0$  Hz, 1H), 7.69 (d,  $J = 8.0$  Hz, 1H), 7.64-7.60 (m, 1H), 7.54 (d,  $J = 8.0$  Hz, 1H), 7.49-7.45 (m, 1H), 4.31-4.23 (m, 1H), 2.27-2.23 (m, 2H), 2.01-1.96 (m, 2H), 1.89-1.78 (m, 3H), 1.58-1.46 (m, 2H), 1.39-1.27 (m, 1H); <sup>13</sup>C NMR (100 MHz, CDCl<sub>3</sub>):  $\delta$  139.3, 138.1, 130.2, 129.7, 128.4, 127.5, 126.6, 124.5,

123.7, 121.8, 110.8, 55.7, 33.7, 25.8, 25.5; HRMS (ESI, m/z) calcd. For C<sub>17</sub>H<sub>19</sub>N<sub>2</sub> [M+H]<sup>+</sup>: 251.1548; found: 251.1571.

### 3-cyclohexyl-5-methyl-3*H*-naphtho[1,2-*d*]imidazole (4b)

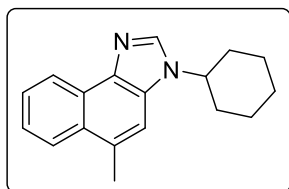

The general procedure for imidazole was followed. Column chromatography (SiO<sub>2</sub>, eluting with 90:10 hexane/acetone) afforded the desired product as a light brown gummy solid (71 mg, 90% yield). <sup>1</sup>H NMR (400 MHz, DMSO-*d*<sub>6</sub>): δ 8.47-8.44 (m, 1H), 8.23 (s, 1H), 8.01 (d, *J* = 8.0 Hz, 1H), 7.68 (d, *J* = 0.8 Hz, 1H), 7.59-7.55 (m, 1H), 7.49-7.45 (m, 1H), 4.43-4.35 (m, 1H), 2.69 (s, 3H), 2.06-2.02 (m, 2H), 1.89-1.88 (m, 4H), 1.69 (d, *J* = 12.8 Hz, 1H), 1.53-1.43 (m, 2H), 1.33 - 1.25 (m 1H); <sup>13</sup>C NMR (100 MHz, DMSO-*d*<sub>6</sub>): δ 139.2, 137.8, 129.6, 129.4, 129.3, 127.5, 126.4, 125.4, 124.6, 122.1, 112.5, 54.9, 33.5, 25.7, 25.4, 20.3; HRMS (ESI, m/z) calcd. For C<sub>18</sub>H<sub>21</sub>N<sub>2</sub> [M+H]<sup>+</sup>: 265.1705; found: 265.1713.

### 3-cyclohexyl-5-methoxy-3*H*-naphtho[1,2-*d*]imidazole (4c)

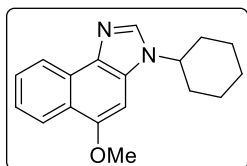

The general procedure for imidazole was followed. Column chromatography (SiO<sub>2</sub>, eluting with 90:10 hexane/acetone) afforded the desired product as a light orange solid (66 mg, 78% yield); mp: 98-100 °C. <sup>1</sup>H NMR (400 MHz, DMSO-*d*<sub>6</sub>): δ 8.39-8.36 (m, 1H), 8.18-8.16 (m, 2H), 7.59-7.55 (m, 1H), 7.43-7.39 (m, 1H), 7.24 (s, 1H), 4.46-4.39 (m, 1H), 2.69 (s, 3H), 2.06-2.03 (m, 2H), 1.85-1.67 (m, 4H), 1.69 (d, *J* = 12.8 Hz, 1H), 1.55-1.44 (m, 2H), 1.31-1.21 (m, 1H); <sup>13</sup>C NMR (100 MHz, DMSO-*d*<sub>6</sub>): δ 152.4, 138.3, 132.8, 130.0, 127.6, 127.3, 124.1, 123.1, 122.9, 121.5, 91.3, 56.6, 54.5, 33.6, 25.8, 25.4; HRMS (ESI, m/z) calcd. For C<sub>18</sub>H<sub>21</sub>N<sub>2</sub>O [M+H]<sup>+</sup>: 281.1654; found: 281.1643.

### 3-cyclohexyl-5-fluoro-3*H*-naphtho[1,2-*d*]imidazole (4d)

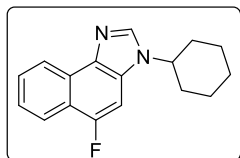

The general procedure for imidazole was followed. Column chromatography (SiO<sub>2</sub>, eluting with 90:10 hexane/acetone) afforded the desired product as a creamy white solid (58 mg, 72% yield); mp: 114-116 °C. <sup>1</sup>H NMR (400 MHz, DMSO-d<sub>6</sub>): δ 8.47-8.44 (m, 1H), 8.34 (s, 1H), 8.05 (d, *J* = 8.4 Hz, 1H), 7.82 (d, *J* = 11.2 Hz, 1H), 7.68-7.64 (m, 1H), 7.56-7.52 (m, 1H), 4.45-4.37 (m, 1H), 2.05-2.01 (m, 2H), 1.87-1.77 (m, 4H), 1.68 (d, *J* = 12.8 Hz, 1H), 1.52-1.41 (m, 2H), 1.32-1.21 (m, 1H); <sup>13</sup>C NMR (100 MHz, DMSO-d<sub>6</sub>): δ 155.2 (d, *J* = 242.0 Hz), 140.3, 135.2, 128.7 (d, *J* = 13.8 Hz), 127.9, 127.3 (d, *J* = 6.2 Hz), 125.2 (d, *J* = 1.3 Hz), 121.9 (d, *J* = 2.7 Hz), 121.4 (d, *J* = 5.6 Hz), 120.3 (d, *J* = 18.5, Hz), 97.2 (d, *J* = 26.7 Hz), 55.1, 33.4, 25.7, 25.3; <sup>19</sup>F NMR (376 MHz, DMSO-d<sub>6</sub>): δ -128.5; HRMS (ESI, *m/z*) calcd. For C<sub>17</sub>H<sub>18</sub>FN<sub>2</sub> [M+H]<sup>+</sup>: 269.1454; found: 269.1442.

### 3-cyclohexyl-5-(trifluoromethyl)-3H-naphtho[1,2-d]imidazole (4e)

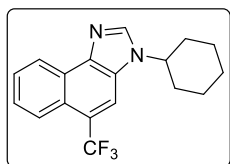

The general procedure for imidazole was followed. Column chromatography (SiO<sub>2</sub>, eluting with 90:10 hexane/acetone) afforded the desired product as a light orange solid (43 mg, 45% yield); mp: 98-100 °C. <sup>1</sup>H NMR (600 MHz, DMSO-d<sub>6</sub>): δ 8.64-8.63 (m, 2H), 8.44 (s, 1H), 8.15 (d, *J* = 8.4 Hz, 1H), 7.75 (t, *J* = 7.2 Hz 1H), 7.69-7.66 (m, 1H), 4.71-4.66 (m, 1H), 2.10-2.08 (m, 2H), 1.90-1.87 (m, 4H), 1.74 (d, *J* = 12.6 Hz, 1H), 1.59-1.52 (m, 2H), 1.34-1.27 (m, 1H); <sup>13</sup>C NMR (150 MHz, DMSO-d<sub>6</sub>): δ 142.3, 141.1, 127.4, 127.1, 126.1, 126.0, 124.7, 124.3, 124.1, 112.1, 118.9 (q, *J* = 31.9 Hz), 112.2 (q, *J* = 8.9 Hz), 54.3, 33.2, 25.0, 24.8; <sup>19</sup>F NMR (376 MHz, DMSO-d<sub>6</sub>): δ -156.9; HRMS (ESI, *m/z*) calcd. For C<sub>18</sub>H<sub>18</sub>F<sub>3</sub>N<sub>2</sub> [M+H]<sup>+</sup>: 319.1422; found: 319.1412.

### methyl 3-cyclohexyl-3H-naphtho[1,2-d]imidazole-5-carboxylate (4f)

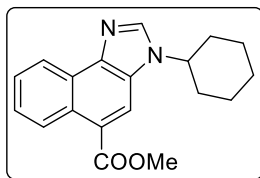

The general procedure for imidazole was followed. Column chromatography (SiO<sub>2</sub>, eluting with 90:10 hexane/acetone) afforded the desired product as a light brown gummy solid (46 mg, 50% yield). <sup>1</sup>H NMR (400 MHz, DMSO-d<sub>6</sub>): δ 8.82 (d, *J* = 8.8 Hz, 1H), 8.57-8.54 (m, 2H), 8.48 (s, 1H), 7.66-7.62 (m, 1H), 7.58-7.54 (m, 1H), 4.59-4.52 (m, 1H), 3.94 (s, 3H), 2.08-2.03 (m, 2H), 1.89-1.79 (m, 4H), 1.69 (d, *J* = 12.4 Hz, 1H), 1.56-1.46 (m, 2H), 1.30-1.20 (m, 1H); <sup>13</sup>C NMR (100 MHz, DMSO-d<sub>6</sub>): δ 168.1, 142.9, 142.2, 128.4, 127.9, 127.4, 127.0, 126.6, 126.2, 122.2, 121.9, 116.8, 54.9, 52.7, 33.7, 25.6, 25.4; HRMS (ESI, *m/z*) calcd. For C<sub>19</sub>H<sub>21</sub>N<sub>2</sub>O<sub>2</sub> [M+H]<sup>+</sup>: 309.1603; found: 309.1605.

#### 5-bromo-3-cyclohexyl-3*H*-naphtho[1,2-*d*]imidazole (4g)

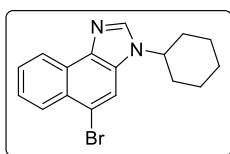

The general procedure for imidazole was followed. Column chromatography (SiO<sub>2</sub>, eluting with 90:10 hexane/acetone) afforded the desired product as a creamy white solid (82 mg, 83% yield); mp: 118-120 °C. <sup>1</sup>H NMR (400 MHz, CDCl<sub>3</sub>): δ 8.67-8.64 (m, 1H), 8.31-8.28 (m, 1H), 8.03 (s, 1H), 7.89 (s, 1H), 7.67-7.63 (m, 1H), 7.59-7.57 (m, 1H), 4.24-4.17 (m, 1H), 2.25-2.21 (m, 2H), 2.00-1.95 (m, 2H), 1.84-1.75 (m, 3H), 1.57-1.45 (m, 2H), 1.37-1.29 (m, 1H); <sup>13</sup>C NMR (100 MHz, CDCl<sub>3</sub>): δ 139.0, 138.5, 129.6, 128.3, 128.0, 127.9, 127.4, 125.8, 122.2, 117.7, 114.9, 55.9, 33.7, 25.7, 25.4; HRMS (ESI, *m/z*) calcd. For C<sub>17</sub>H<sub>18</sub>BrN<sub>2</sub> [M+H]<sup>+</sup>: 329.0653; found: 329.0663.

#### 3-cyclohexyl-5-(furan-3-yl)-3*H*-naphtho[1,2-*d*]imidazole (4h)

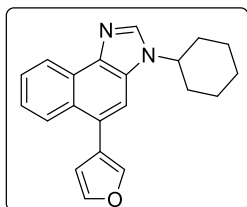

The general procedure for imidazole was followed. Column chromatography (SiO<sub>2</sub>, eluting with 90:10 hexane/acetone) afforded the desired product as a light yellow solid (81 mg, 85% yield); mp: 156-158 °C. <sup>1</sup>H NMR (400 MHz, DMSO-d<sub>6</sub>): δ 8.72-8.69 (m, 1H), 8.12 (dt, *J*<sub>1</sub> = 8.4 Hz, *J*<sub>2</sub> = 1.2 Hz, 1H), 8.05 (s, 1H), 7.67 (dd, *J*<sub>1</sub> = 1.6 Hz, *J*<sub>2</sub> = 0.8 Hz, 1H), 7.66-7.62 (m, 1H), 7.60 (t, *J* = 1.6 Hz, 1H), 7.52 (s, 1H), 7.49-7.45 (m, 1H), 6.72 (dd, *J*<sub>1</sub> = 1.6 Hz, *J*<sub>2</sub> = 0.8 Hz, 1H), 4.32-4.24 (m, 1H), 2.29-2.25 (m, 2H), 2.01-1.96 (m, 2H), 1.90-1.80 (m, 3H), 1.58-1.46 (m, 2H), 1.39-1.31 (m, 1H); <sup>13</sup>C NMR (100 MHz, DMSO-d<sub>6</sub>): δ 142.9, 140.5, 139.1, 138.3, 129.2, 129.0, 127.6, 126.6, 126.5, 125.5, 124.8, 122.1, 113.0, 111.7, 55.7, 33.8, 25.8, 25.5; HRMS (ESI, m/z) calcd. For C<sub>21</sub>H<sub>21</sub>N<sub>2</sub>O [M+H]<sup>+</sup>: 317.1654; found: 317.1664.

### 3-cyclohexyl-5-(phenylethynyl)-3*H*-naphtho[1,2-*d*]imidazole (4i)

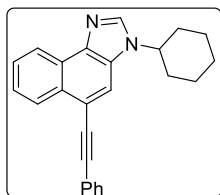

The general procedure for imidazole was followed. Column chromatography (SiO<sub>2</sub>, eluting with 90:10 hexane/acetone) afforded the desired product as a yellow fluffy solid (60 mg, 57% yield); mp: 68-70 °C. <sup>1</sup>H NMR (400 MHz, DMSO-d<sub>6</sub>): δ 8.51-8.42 (m, 3H), 8.24 (s, 1H), 7.69-7.59 (m, 4H), 7.47-7.40 (m, 3H), 4.54 (t, *J* = 11.2 Hz, 1H), 2.07 (d, *J* = 9.2 Hz, 2H), 1.90-1.84 (m, 4H), 1.70 (d, *J* = 12.4 Hz, 1H), 1.56-1.47 (m, 2H), 1.33-1.23 (m, 1H); <sup>13</sup>C NMR (100 MHz, DMSO-d<sub>6</sub>): δ 141.6, 139.8, 131.9, 129.7, 129.43, 129.39, 129.3, 127.5, 127.2, 126.8, 125.9, 123.2, 122.2, 117.0, 114.6, 93.7, 88.9, 55.0, 33.6, 25.7, 25.4; HRMS (ESI, m/z) calcd. For C<sub>25</sub>H<sub>23</sub>N<sub>2</sub> [M+H]<sup>+</sup>: 351.1861; found: 351.1846.

### 5-(4-chlorophenyl)-3-cyclohexyl-3*H*-naphtho[1,2-*d*]imidazole (4j)

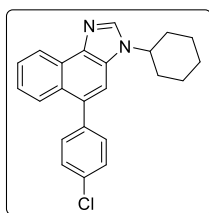

The general procedure for imidazole was followed. Column chromatography (SiO<sub>2</sub>, eluting with 90:10 hexane/acetone) afforded the desired product as a yellow powder (93 mg, 86% yield); mp:

124-126 °C. <sup>1</sup>H NMR (400 MHz, DMSO-d<sub>6</sub>): δ 8.54 (d, *J* = 8.0 Hz, 1H), 8.38 (s, 1H), 7.76-7.72 (m, 2H), 7.61-7.39 (m, 6H), 4.49 (t, *J* = 10.4 Hz, 1H), 2.07-2.04 (m, 2H), 1.88-1.79 (m, 4H), 1.66 (d, *J* = 11.2 Hz, 1H), 1.51-1.41 (m, 2H), 1.29-1.23 (m, 1H); <sup>13</sup>C NMR (100 MHz, DMSO-d<sub>6</sub>): δ 140.4, 140.1, 138.7, 133.9, 132.6, 132.5, 129.5, 128.9, 128.2, 127.5, 126.7, 126.5, 125.0, 122.1, 113.2, 54.9, 33.6, 25.7, 25.4; HRMS (ESI, *m/z*) calcd. For C<sub>23</sub>H<sub>22</sub>ClN<sub>2</sub> [M+H]<sup>+</sup>: 361.1472; found: 361.1471.

### 3-cyclohexyl-5-(1H-pyrazol-1-yl)-3H-naphtho[1,2-*d*]imidazole (4k)

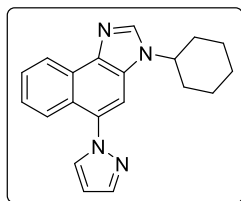

The general procedure for imidazole was followed. Column chromatography (SiO<sub>2</sub>, eluting with 90:10 hexane/acetone) afforded the desired product as a light brown gummy solid (38 mg, 40% yield). <sup>1</sup>H NMR (400 MHz, DMSO-d<sub>6</sub>): δ 8.55-8.54 (m, 1H), 8.49 (s, 1H), 8.15 (dd, *J*<sub>1</sub> = 2.4 Hz, *J*<sub>2</sub> = 0.8 Hz, 1H), 8.05 (s, 1H), 7.81 (dd, *J*<sub>1</sub> = 2.0 Hz, *J*<sub>2</sub> = 0.8 Hz, 1H), 7.66-7.62 (m, 1H), 7.53-7.52 (m, 1H), 7.48-7.43 (m, 1H), 6.58 (t, *J* = 2.0 Hz, 1H), 4.57-4.50 (m, 1H), 2.08-2.04 (m, 2H), 1.91-1.81 (m, 4H), 1.68 (d, *J* = 12.4 Hz, 1H), 1.54-1.43 (m, 2H), 1.33-1.25 (m, 1H); <sup>13</sup>C NMR (100 MHz, DMSO-d<sub>6</sub>): δ 141.4, 140.8, 138.8, 133.6, 133.1, 128.7, 127.5, 127.2, 126.5, 125.6, 124.3, 121.9, 110.9, 106.8, 55.0, 33.6, 25.6, 25.3; HRMS (ESI, *m/z*) calcd. For C<sub>20</sub>H<sub>21</sub>N<sub>4</sub> [M+H]<sup>+</sup>: 317.1766; found: 317.1755.

### 3-cyclohexyl-3H-imidazo[4,5-*f*]quinoline (4l)

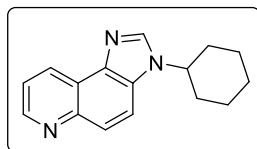

The general procedure for imidazole was followed. Column chromatography (SiO<sub>2</sub>, eluting with 90:10 hexane/acetone) afforded the desired product as a pale yellow solid (40 mg, 53% yield); mp: 144-146 °C. <sup>1</sup>H NMR (400 MHz, DMSO-d<sub>6</sub>): δ 8.82 (dd, *J*<sub>1</sub> = 4.4 Hz, *J*<sub>2</sub> = 2.0 Hz, 1H), 8.79-8.77 (m, 1H), 8.43 (s, 1H), 8.06 (d, *J* = 9.2 Hz, 1H), 7.81 (d, *J* = 9.2 Hz, 1H), 7.56 (dd, *J*<sub>1</sub> = 8.0 Hz, *J*<sub>2</sub> = 4.0 Hz, 1H), 4.50-4.42 (m, 1H), 2.05-2.02 (m, 2H), 1.89-1.79 (m, 4H), 1.67 (d, *J* = 13.2 Hz, 1H),



1.52-1.42 (m, 2H), 1.30-1.22 (m, 1H);  $^{13}\text{C}$  NMR (100 MHz, DMSO- $d_6$ ):  $\delta$  148.7, 145.9, 141.1, 138.4, 129.9, 129.8, 124.2, 122.3, 121.8, 115.5, 55.2, 33.2, 25.7, 25.3; HRMS (ESI,  $m/z$ ) calcd. For  $\text{C}_{16}\text{H}_{18}\text{N}_3$   $[\text{M}+\text{H}]^+$ : 252.1501; found: 252.1502.

#### 1-cyclohexyl-1*H*-naphtho[1,2-*d*]imidazole (4m)

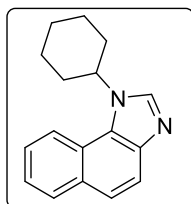

The general procedure for imidazole was followed. Column chromatography ( $\text{SiO}_2$ , eluting with 90:10 hexane/acetone) afforded the desired product as a white powder (30 mg, 40% yield); mp: 140-142  $^\circ\text{C}$ .  $^1\text{H}$  NMR (400 MHz, DMSO- $d_6$ ):  $\delta$  8.36 (s, 1H), 8.28 (d,  $J = 8.4$  Hz, 1H), 8.02 (dd,  $J_1 = 8.4$  Hz,  $J_2 = 1.2$  Hz, 1H), 7.75 (d,  $J = 8.4$  Hz, 1H), 7.67 (d,  $J = 8.8$  Hz, 1H), 7.65-7.60 (m, 1H), 7.50-7.46 (m, 1H), 4.91-4.84 (m, 1H), 2.26 (d,  $J = 12.0$  Hz, 2H), 1.89-1.58 (m, 7H), 1.34-1.26 (m, 1H);  $^{13}\text{C}$  NMR (100 MHz, DMSO- $d_6$ ):  $\delta$  141.6, 140.4, 131.4, 129.9, 127.3, 126.8, 124.5, 123.8, 122.4, 120.9, 120.6, 56.9, 33.8, 25.8, 25.6; HRMS (ESI,  $m/z$ ) calcd. For  $\text{C}_{17}\text{H}_{19}\text{N}_2$   $[\text{M}+\text{H}]^+$ : 251.1548; found: 251.1545.

#### 1-cyclohexyl-1*H*-imidazo[4,5-*f*]quinoline (4n)

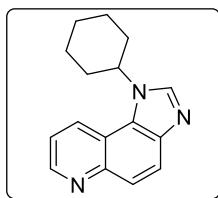

The general procedure for imidazole was followed. Column chromatography ( $\text{SiO}_2$ , eluting with 90:10 hexane/acetone) afforded the desired product as a light brown solid (32 mg, 42% yield); mp: 148-150  $^\circ\text{C}$ .  $^1\text{H}$  NMR (400 MHz, DMSO- $d_6$ ):  $\delta$  8.84 (dd,  $J_1 = 4.4$  Hz,  $J_2 = 1.6$  Hz, 1H), 8.68 (d,  $J = 8.4$  Hz, 1H), 8.45 (s, 1H), 7.99 (d,  $J = 8.8$  Hz, 1H), 7.80 (d,  $J = 8.8$  Hz, 1H), 7.62 (dd,  $J_1 = 8.8$  Hz,  $J_2 = 4.4$  Hz, 1H), 4.91-4.84 (m, 1H), 2.34 (d,  $J = 11.2$  Hz, 2H), 1.88-1.60 (m, 7H), 1.33-1.25 (m, 1H);  $^{13}\text{C}$  NMR (100 MHz, DMSO- $d_6$ ):  $\delta$  148.1, 146.5, 141.4, 141.3, 129.4, 126.6, 124.9, 123.9, 121.5, 117.5, 56.8, 33.6, 25.6, 25.5; HRMS (ESI,  $m/z$ ) calcd. For  $\text{C}_{16}\text{H}_{18}\text{N}_3$   $[\text{M}+\text{H}]^+$ : 252.1501; found: 252.1497.

### 1-cyclohexyl-1*H*-anthra[1,2-*d*]imidazole (4o)

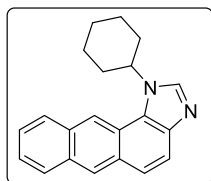

The general procedure for imidazole was followed. Column chromatography (SiO<sub>2</sub>, eluting with 90:10 hexane/acetone) afforded the desired product as a creamy white solid (61 mg, 68% yield); mp: 154-156 °C. <sup>1</sup>H NMR (400 MHz, DMSO-*d*<sub>6</sub>): δ 8.79 (s, 1H), 8.65 (s, 1H), 8.36 (s, 1H), 8.19 (d, *J* = 8.0 Hz, 1H), 8.07 (d, *J* = 8.8 Hz, 1H), 7.81 (d, *J* = 8.8 Hz, 1H), 7.73 (d, *J* = 9.2 Hz, 1H), 7.57-7.49 (m, 2H), 5.14-5.07 (m, 1H), 2.35 (d, *J* = 12.0 Hz, 2H), 1.93-1.77 (m, 7H), 1.37-1.28 (m, 1H); <sup>13</sup>C NMR (100 MHz, DMSO-*d*<sub>6</sub>): δ 141.0, 139.6, 131.6, 130.5, 130.1, 128.9, 128.3, 128.2, 126.4, 126.3, 125.8, 124.5, 121.8, 121.5, 118.9, 57.0, 33.8, 25.7, 25.5; HRMS (ESI, *m/z*) calcd. For C<sub>21</sub>H<sub>21</sub>N<sub>2</sub> [M+H]<sup>+</sup>: 301.1705; found: 301.1703.

### 3-cyclohexyl-3*H*-naphtho[1,2-*d*]imidazol-5-yl 2-(4-isobutylphenyl)propanoate (4p)

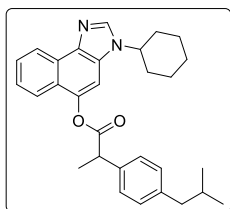

The general procedure for imidazole was followed. Column chromatography (SiO<sub>2</sub>, eluting with 90:10 hexane/acetone) afforded the desired product as a light brown gummy liquid (91 mg, 67% yield). <sup>1</sup>H NMR (400 MHz, DMSO-*d*<sub>6</sub>): δ 8.43 (dt, *J*<sub>1</sub> = 8.4 Hz, *J*<sub>2</sub> = 0.8 Hz, 1H), 8.35 (s, 1H), 7.68 (s, 1H), 7.57-7.53 (m, 1H), 7.40 (d, *J* = 8.0 Hz, 2H), 7.24-7.19 (m, 4H), 4.44-4.36 (m, 1H), 4.24 (q, *J* = 6.8 Hz, 1H), 2.44 (d, *J* = 6.8 Hz, 2H), 2.04-1.99 (m, 2H), 1.86-1.79 (m, 5H), 1.67 (d, *J* = 12.0 Hz, 1H), 1.58 (d, *J* = 7.2 Hz, 3H), 1.51-1.41 (m, 2H), 1.28-1.18 (m, 1H), 0.85 (d, *J* = 6.4 Hz, 6H); <sup>13</sup>C NMR (100 MHz, DMSO-*d*<sub>6</sub>): δ 173.8, 160.5, 142.6, 140.9, 140.5, 137.9, 136.8, 129.9, 128.9, 128.1, 127.3, 124.8, 123.7, 118.2, 105.4, 55.0, 44.9, 44.8, 33.5, 33.4, 32.8, 30.2, 25.6, 25.3, 22.7, 22.6, 18.6; HRMS (ESI, *m/z*) calcd. For C<sub>30</sub>H<sub>35</sub>N<sub>2</sub>O<sub>2</sub> [M+H]<sup>+</sup>: 455.2699; found: 455.2697.

### 3-cyclopentyl-3*H*-naphtho[1,2-*d*]imidazole (4q)

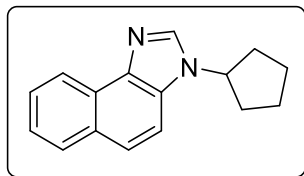

The general procedure for imidazole was followed. Column chromatography (SiO<sub>2</sub>, eluting with 90:10 hexane/acetone) afforded the desired product as a creamy white solid (61 mg, 86% yield); mp: 114-116 °C. <sup>1</sup>H NMR (400 MHz, DMSO-d<sub>6</sub>): δ 8.47-8.44 (m, 1H), 8.31 (s, 1H), 7.95 (d, *J* = 8.4 Hz, 1H), 7.74 (d, *J* = 8.8 Hz, 1H), 7.69 (d, *J* = 8.8 Hz, 1H), 7.59-7.55 (m, 1H), 7.46-7.41 (m, 1H), 4.93-4.86 (m, 1H), 2.23-2.14 (m, 2H), 1.97-1.89 (m, 2H), 1.86-1.77 (m, 2H), 1.72-1.67 (m, 2H); <sup>13</sup>C NMR (100 MHz, DMSO-d<sub>6</sub>): δ 140.2, 139.2, 130.5, 130.2, 128.9, 127.4, 126.7, 124.7, 123.4, 121.7, 112.4, 56.9, 32.7, 24.1; HRMS (ESI, *m/z*) calcd. For C<sub>16</sub>H<sub>17</sub>N<sub>2</sub> [M+H]<sup>+</sup>: 237.1392; found: 237.1394.

### 3-cycloheptyl-3H-naphtho[1,2-*d*]imidazole (4r)

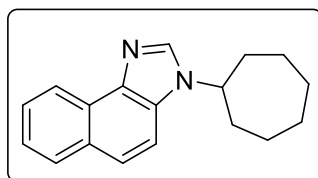

The general procedure for imidazole was followed. Column chromatography (SiO<sub>2</sub>, eluting with 90:10 hexane/acetone) afforded the desired product as a creamy white solid (54 mg, 68% yield); mp: 98-100 °C. <sup>1</sup>H NMR (400 MHz, DMSO-d<sub>6</sub>): δ 8.42 (d, *J* = 8.0 Hz, 1H), 8.33 (s, 1H), 7.95 (d, *J* = 8.0 Hz, 1H), 7.78 (d, *J* = 9.2 Hz, 1H), 7.69 (d, *J* = 8.8 Hz, 1H), 7.58-7.54 (m, 1H), 7.45-7.41 (m, 1H), 4.66-4.59 (m, 1H), 2.08-2.03 (m, 4H), 1.79-1.58 (m, 8H); <sup>13</sup>C NMR (100 MHz, DMSO-d<sub>6</sub>): δ 140.2, 138.9, 130.1, 129.7, 128.9, 127.4, 126.7, 124.6, 123.3, 121.6, 112.4, 57.5, 35.5, 27.5, 24.7; HRMS (ESI, *m/z*) calcd. For C<sub>18</sub>H<sub>21</sub>N<sub>2</sub> [M+H]<sup>+</sup>: 265.1705; found: 265.1714.

### *tert*-butyl 4-(3H-naphtho[1,2-*d*]imidazol-3-yl)piperidine-1-carboxylate (4s)

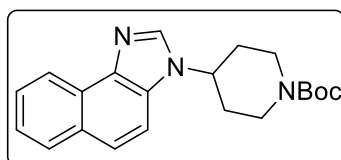

The general procedure for imidazole was followed. Column chromatography (SiO<sub>2</sub>, eluting with 90:10 hexane/acetone) afforded the desired product as a creamy white solid (84 mg, 80% yield); mp: 182-184 °C. <sup>1</sup>H NMR (400 MHz, DMSO-d<sub>6</sub>): δ 8.42 (d, *J* = 8.0 Hz, 1H), 8.39 (s, 1H), 7.96 (d, *J* = 8.0 Hz, 1H), 7.83 (d, *J* = 8.0 Hz, 1H), 7.72 (d, *J* = 8.8 Hz, 1H), 7.59-7.54 (m, 1H), 7.46-7.40 (m, 1H), 4.72-4.64 (m, 1H), 4.13 (d, *J* = 11.6 Hz, 2H), 2.95 (br.s, 2H), 2.07-1.89 (m, 4H), 1.41 (s, 9H); <sup>13</sup>C NMR (100 MHz, DMSO-d<sub>6</sub>): δ 154.3, 140.0, 138.8, 130.2, 130.0, 128.9, 127.3, 126.8, 124.7, 123.4, 121.6, 112.1, 79.5, 53.1, 32.6, 28.6; HRMS (ESI, m/z) calcd. For C<sub>21</sub>H<sub>26</sub>N<sub>3</sub>O<sub>2</sub> [M+H]<sup>+</sup>: 352.2025; found: 352.2029.

### 3-isopropyl-3*H*-naphtho[1,2-*d*]imidazole (4t)

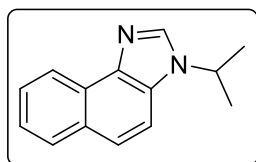

The general procedure for imidazole was followed. Column chromatography (SiO<sub>2</sub>, eluting with 90:10 hexane/acetone) afforded the desired product as a creamy white solid (38 mg, 60% yield); mp: 108-110 °C. <sup>1</sup>H NMR (400 MHz, DMSO-d<sub>6</sub>): δ 8.44-8.43 (m, 1H), 8.35 (s, 1H), 7.96 (d, *J* = 7.6 Hz, 1H), 7.79 (d, *J* = 8.8 Hz, 1H), 7.70 (d, *J* = 8.8 Hz, 1H), 7.58-7.54 (m, 1H), 7.46-7.41 (m, 1H), 4.88-4.78 (m, 1H), 1.55 (d, *J* = 6.8 Hz, 6H); <sup>13</sup>C NMR (100 MHz, DMSO-d<sub>6</sub>): δ 139.9, 139.1, 130.1, 129.9, 128.9, 127.4, 126.7, 124.6, 123.3, 121.6, 112.3, 47.8, 23.1; HRMS (ESI, m/z) calcd. For C<sub>14</sub>H<sub>15</sub>N<sub>2</sub> [M+H]<sup>+</sup>: 211.1235; found: 211.1240.

### 3-butyl-3*H*-naphtho[1,2-*d*]imidazole (4u)

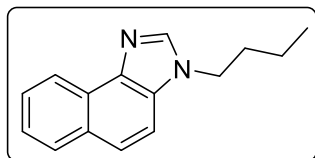

The general procedure for imidazole was followed. Column chromatography (SiO<sub>2</sub>, eluting with 90:10 hexane/acetone) afforded the desired product as a light brown gummy solid (33 mg, 48% yield). <sup>1</sup>H NMR (400 MHz, DMSO-d<sub>6</sub>): δ 8.44-8.41 (m, 1H), 8.24 (s, 1H), 7.95 (d, *J* = 8.0 Hz, 1H), 7.75 (d, *J* = 8.8 Hz, 1H), 7.70 (d, *J* = 8.8 Hz, 1H), 7.58-7.54 (m, 1H), 7.45-7.41 (m, 1H), 4.30 (t, *J* = 7.2 Hz, 1H), 1.77 (qu, *J* = 7.2 Hz, 2H), 1.27-1.18 (m, 2H), 0.85 (t, *J* = 7.2 Hz, 3H); <sup>13</sup>C

NMR (100 MHz, DMSO-d<sub>6</sub>):  $\delta$  142.4, 138.9, 130.6, 130.1, 128.9, 127.3, 126.7, 124.6, 123.5, 121.6, 112.0, 44.6, 32.5, 19.9, 13.9; HRMS (ESI, m/z) calcd. For C<sub>15</sub>H<sub>17</sub>N<sub>2</sub> [M+H]<sup>+</sup>: 225.1392; found: 225.1402.

### 3-isobutyl-3*H*-naphtho[1,2-*d*]imidazole (4v)

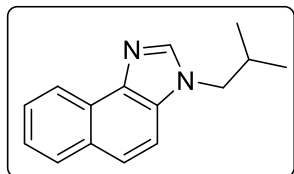

The general procedure for imidazole was followed. Column chromatography (SiO<sub>2</sub>, eluting with 90:10 hexane/acetone) afforded the desired product as a light brown solid (50 mg, 74% yield); mp: 74-76 °C. <sup>1</sup>H NMR (400 MHz, DMSO-d<sub>6</sub>):  $\delta$  8.44-8.42 (m, 1H), 8.22 (s, 1H), 7.95 (d, *J* = 8.0 Hz, 1H), 7.76 (d, *J* = 8.8 Hz, 1H), 7.69 (d, *J* = 8.8 Hz, 1H), 7.59-7.55 (m, 1H), 7.46-7.41 (m, 1H), 4.12 (d, *J* = 7.2 Hz, 2H), 2.16-2.08 (m, 1H), 0.83 (d, *J* = 6.8 Hz, 6H); <sup>13</sup>C NMR (100 MHz, DMSO-d<sub>6</sub>):  $\delta$  142.8, 138.8, 130.9, 130.1, 128.9, 127.3, 126.7, 124.6, 123.5, 121.5, 112.3, 51.9, 29.6, 20.2; HRMS (ESI, m/z) calcd. For C<sub>15</sub>H<sub>17</sub>N<sub>2</sub> [M+H]<sup>+</sup>: 225.1392; found: 225.1402.

### 3-(*sec*-butyl)-3*H*-naphtho[1,2-*d*]imidazole (4w)

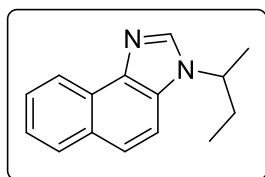

The general procedure for imidazole was followed. Column chromatography (SiO<sub>2</sub>, eluting with 90:10 hexane/acetone) afforded the desired product as a light brown gummy solid (54 mg, 81% yield). <sup>1</sup>H NMR (400 MHz, DMSO-d<sub>6</sub>):  $\delta$  8.45-8.43 (m, 1H), 8.33 (s, 1H), 7.95 (d, *J* = 8.4 Hz, 1H), 7.78 (d, *J* = 8.8 Hz, 1H), 7.68 (d, *J* = 8.8 Hz, 1H), 7.58-7.54 (m, 1H), 7.45-7.41 (m, 1H), 4.62-4.53 (m, 1H), 1.97-1.82 (m, 2H), 1.53 (d, *J* = 6.8 Hz, 3H), 0.71 (t, *J* = 7.6 Hz, 3H); <sup>13</sup>C NMR (100 MHz, DMSO-d<sub>6</sub>):  $\delta$  140.5, 139.0, 130.2, 130.1, 128.9, 127.4, 126.7, 124.6, 123.3, 121.6, 112.4, 53.6, 29.8, 21.2, 11.0; HRMS (ESI, m/z) calcd. For C<sub>15</sub>H<sub>17</sub>N<sub>2</sub> [M+H]<sup>+</sup>: 225.1392; found: 225.1401.

### 3-(*tert*-butyl)-3*H*-naphtho[1,2-*d*]imidazole (4x)

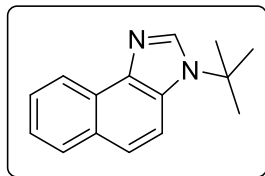

The general procedure for imidazole was followed. Column chromatography (SiO<sub>2</sub>, eluting with 90:10 hexane/acetone) afforded the desired product as a light brown gummy solid (29 mg, 43% yield). <sup>1</sup>H NMR (400 MHz, DMSO-d<sub>6</sub>): δ 8.46-8.44 (m, 1H), 8.23 (s, 1H), 7.98-7.94 (m, 2H), 7.67 (d, *J* = 9.2 Hz, 1H), 7.58-7.54 (m, 1H), 7.46-7.42 (m, 1H), 1.72 (s, 9H); <sup>13</sup>C NMR (100 MHz, DMSO-d<sub>6</sub>): δ 140.5, 140.0, 129.6, 129.5, 128.6, 127.4, 126.6, 124.8, 122.9, 121.7, 114.7, 56.8, 29.8; HRMS (ESI, *m/z*) calcd. For C<sub>15</sub>H<sub>17</sub>N<sub>2</sub> [M+H]<sup>+</sup>: 225.1392; found: 225.1388.

### 3-(1-phenylethyl)-3H-naphtho[1,2-d]imidazole (4y)

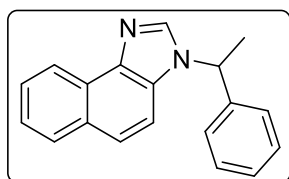

The general procedure for imidazole was followed. Column chromatography (SiO<sub>2</sub>, eluting with 90:10 hexane/acetone) afforded the desired product as a yellow solid (69 mg, 85% yield); mp: 114-116 °C. <sup>1</sup>H NMR (400 MHz, DMSO-d<sub>6</sub>): δ 8.58 (s, 1H), 8.46-8.43 (m, 1H), 7.91 (d, *J* = 8.4 Hz, 1H), 7.62 (d, *J* = 8.8 Hz, 1H), 7.58-7.55 (m, 2H), 7.43-7.41 (m, 1H), 7.30-7.28 (m, 4H), 7.24-7.21 (m, 1H), 5.94 (q, *J* = 6.8 Hz, 1H), 1.97 (d, *J* = 7.2 Hz, 3H); <sup>13</sup>C NMR (100 MHz, DMSO-d<sub>6</sub>): δ 142.4, 140.5, 139.2, 130.3, 130.2, 129.3, 128.9, 128.2, 127.3, 126.8, 126.6, 124.8, 123.5, 121.6, 112.5, 55.0, 21.7; HRMS (ESI, *m/z*) calcd. For C<sub>19</sub>H<sub>17</sub>N<sub>2</sub> [M+H]<sup>+</sup>: 273.1392; found: 273.1382.

### 3-(1-(naphthalen-1-yl)ethyl)-3H-naphtho[1,2-d]imidazole (4z)

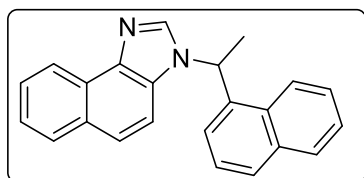

The general procedure for imidazole was followed. Column chromatography (SiO<sub>2</sub>, eluting with 90:10 hexane/acetone) afforded the desired product as a creamy white solid (83 mg, 86% yield);

mp: 178-180 °C.  $^1\text{H}$  NMR (400 MHz, DMSO- $d_6$ ):  $\delta$  8.66 (dd,  $J_1 = 8.0$  Hz,  $J_2 = 0.4$  Hz, 1H), 8.11 (s, 1H), 7.97-7.87 (m, 3H), 7.82 (d,  $J = 8.4$  Hz, 1H), 7.66-7.62 (m, 1H), 7.57 (d,  $J = 8.8$  Hz, 1H), 7.53-7.46 (m, 3H), 7.37 (t,  $J = 8.0$  Hz, 1H), 7.27 (dd,  $J_1 = 8.8$  Hz,  $J_2 = 1.6$  Hz, 1H), 7.15 (d,  $J = 7.2$  Hz, 1H), 6.46 (q,  $J = 6.4$  Hz, 1H), 2.15 (d,  $J = 7.2$  Hz, 3H);  $^{13}\text{C}$  NMR (100 MHz, DMSO- $d_6$ ):  $\delta$  139.3, 139.0, 136.0, 134.0, 130.4, 130.0, 129.4, 129.2, 128.4, 127.3, 127.2, 126.8, 126.2, 125.6, 124.8, 124.3, 123.3, 122.0, 121.9, 110.9, 51.9, 21.4; HRMS (ESI,  $m/z$ ) calcd. For  $\text{C}_{23}\text{H}_{19}\text{N}_2$   $[\text{M}+\text{H}]^+$ : 323.1548; found: 323.1550.

### 3-ethyl-3H-naphtho[1,2-d]imidazole (4aa)

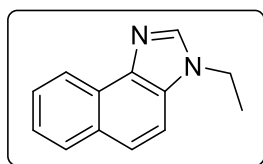

The general procedure for imidazole was followed. Column chromatography ( $\text{SiO}_2$ , eluting with 90:10 hexane/acetone) afforded the desired product as a light brown solid (33 mg, 56% yield); mp: 120-122 °C.  $^1\text{H}$  NMR (400 MHz, DMSO- $d_6$ ):  $\delta$  8.45-8.42 (m, 1H), 8.27 (s, 1H), 7.97-7.95 (m, 1H), 7.76 (d,  $J = 8.8$  Hz, 1H), 7.70 (d,  $J = 8.8$  Hz, 1H), 7.59-7.55 (m, 1H), 7.46-7.42 (m, 1H), 4.34 (q,  $J = 7.2$  Hz, 2H), 1.42 (t,  $J = 7.6$  Hz, 3H);  $^{13}\text{C}$  NMR (100 MHz, DMSO- $d_6$ ):  $\delta$  141.9, 139.1, 130.3, 130.1, 128.9, 127.3, 126.7, 124.6, 123.4, 121.6, 111.9, 39.9, 16.3; HRMS (ESI,  $m/z$ ) calcd. For  $\text{C}_{13}\text{H}_{13}\text{N}_2$   $[\text{M}+\text{H}]^+$ : 197.1079; found: 197.1080.

### 3-allyl-3H-naphtho[1,2-d]imidazole (4ab)

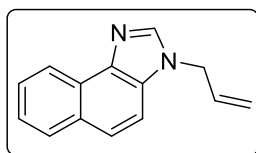

The general procedure for imidazole was followed. Column chromatography ( $\text{SiO}_2$ , eluting with 90:10 hexane/acetone) afforded the desired product as a light brown gummy liquid (29 mg, 46% yield).  $^1\text{H}$  NMR (400 MHz, DMSO- $d_6$ ):  $\delta$  8.46-8.43 (m, 1H), 8.24 (s, 1H), 7.96 (d,  $J = 8.0$  Hz, 1H), 7.72-7.66 (m, 2H), 7.60-7.56 (m, 1H), 7.46-7.42 (m, 1H), 6.10-6.01 (m, 1H), 5.20-5.16 (m, 1H), 5.09-5.04 (m, 1H), 5.00-4.98 (m, 2H);  $^{13}\text{C}$  NMR (100 MHz, DMSO- $d_6$ ):  $\delta$  142.4, 139.0,

134.3, 130.6, 130.2, 129.0, 127.3, 126.8, 124.7, 123.6, 121.6, 117.9, 112.1, 47.3; HRMS (ESI, m/z) calcd. For C<sub>14</sub>H<sub>13</sub>N<sub>2</sub> [M+H]<sup>+</sup>: 209.1079; found: 209.1087.

### 3-benzyl-3*H*-naphtho[1,2-*d*]imidazole (4ac)

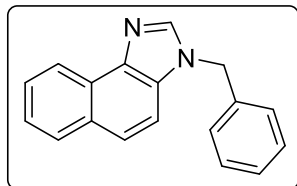

The general procedure for imidazole was followed. Column chromatography (SiO<sub>2</sub>, eluting with 90:10 hexane/acetone) afforded the desired product as a light brown solid (46.4 mg, 60% yield); mp: 96-98 °C. <sup>1</sup>H NMR (400 MHz, DMSO-*d*<sub>6</sub>): δ 8.44 (s, 1H), 7.93 (d, *J* = 8.4 Hz, 1H), 7.67 (s, 2H), 7.59-7.56 (m, 1H), 7.46-7.42 (m, 1H), 7.29-7.20 (m, 6H), 5.59 (s, 2H); <sup>13</sup>C NMR (100 MHz, DMSO-*d*<sub>6</sub>): δ 142.7, 139.2, 137.7, 130.5, 130.2, 129.3, 128.9, 128.3, 127.8, 127.3, 126.8, 124.8, 123.7, 121.6, 112.2, 48.4; HRMS (ESI, m/z) calcd. For C<sub>18</sub>H<sub>15</sub>N<sub>2</sub> [M+H]<sup>+</sup>: 259.1235; found: 259.1239.

### 3-(4-(*tert*-butyl)benzyl)-3*H*-naphtho[1,2-*d*]imidazole (4ad)

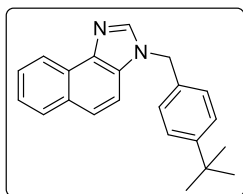

The general procedure for imidazole was followed. Column chromatography (SiO<sub>2</sub>, eluting with 90:10 hexane/acetone) afforded the desired product as a pale yellow solid (49 mg, 52% yield); mp: 88-90 °C. <sup>1</sup>H NMR (400 MHz, DMSO-*d*<sub>6</sub>): δ 8.45-8.42 (m, 2H), 7.93 (d, *J* = 8.0 Hz, 1H), 7.71 (d, *J* = 8.8 Hz, 1H), 7.66 (d, *J* = 9.2 Hz, 1H), 7.57-7.55 (m, 1H), 7.45-7.41 (m, 1H), 7.31-7.28 (m, 2H), 7.23-7.19 (m, 2H), 5.53 (s, 2H), 1.17 (s, 9H); <sup>13</sup>C NMR (100 MHz, DMSO-*d*<sub>6</sub>): δ 150.7, 142.6, 139.2, 134.8, 130.5, 130.1, 128.9, 127.6, 127.3, 126.8, 125.9, 124.7, 123.7, 121.6, 112.2, 48.0, 34.7, 31.6; HRMS (ESI, m/z) calcd. For C<sub>22</sub>H<sub>23</sub>N<sub>2</sub> [M+H]<sup>+</sup>: 315.1861; found: 315.1860.

### 3-(4-methoxybenzyl)-3*H*-naphtho[1,2-*d*]imidazole (4ae)



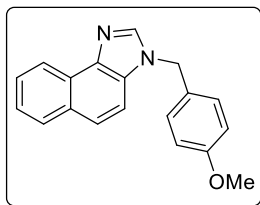

The general procedure for imidazole was followed. Column chromatography (SiO<sub>2</sub>, eluting with 90:10 hexane/acetone) afforded the desired product as a light brown solid (48 mg, 55% yield); mp: 106-108 °C. <sup>1</sup>H NMR (400 MHz, DMSO-d<sub>6</sub>): δ 8.47-8.42 (m, 1H), 8.42 (s, 1H), 7.93 (d, *J* = 8.0 Hz, 1H), 7.70-7.65 (m, 2H), 7.59-7.55 (m, 1H), 7.45-7.41 (m, 1H), 7.29-7.25 (m, 2H), 6.87-6.83 (m, 2H), 5.49 (s, 2H), 3.65 (s, 3H); <sup>13</sup>C NMR (100 MHz, DMSO-d<sub>6</sub>): δ 159.4, 142.5, 139.2, 130.4, 130.1, 129.5, 129.4, 128.9, 127.3, 126.8, 124.7, 123.6, 121.6, 114.6, 112.2, 55.6, 47.9; HRMS (ESI, *m/z*) calcd. For C<sub>19</sub>H<sub>17</sub>N<sub>2</sub>O [M+H]<sup>+</sup>: 289.1341; found: 289.1340.

### 3-(4-fluorobenzyl)-3H-naphtho[1,2-*d*]imidazole (4af)

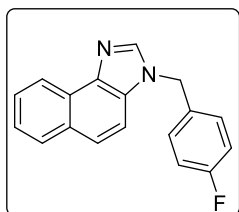

The general procedure for imidazole was followed. Column chromatography (SiO<sub>2</sub>, eluting with 90:10 hexane/acetone) afforded the desired product as a light brown gummy solid (29 mg, 35% yield). <sup>1</sup>H NMR (400 MHz, DMSO-d<sub>6</sub>): δ 8.43-8.41 (m, 2H), 7.94 (d, *J* = 8.4 Hz, 1H), 7.71-7.66 (m, 2H), 7.59-7.55 (m, 1H), 7.46-7.42 (m, 1H), 7.38-7.34 (m, 2H), 7.16-7.11 (m, 2H), 5.58 (s, 2H); <sup>13</sup>C NMR (100 MHz, DMSO-d<sub>6</sub>): δ 162.2 (d, *J* = 242.5 Hz), 142.6, 139.2, 133.9, 130.2, 131.1 (d, *J* = 56.3 Hz), 130.1 (d, *J* = 8.2 Hz), 129.1, 128.9, 127.3, 126.9, 124.8 (d, *J* = 104.0 Hz), 121.6, 116.1 (d, *J* = 21.3 Hz), 112.1, 47.6; HRMS (ESI, *m/z*) calcd. For C<sub>18</sub>H<sub>14</sub>FN<sub>2</sub> [M+H]<sup>+</sup>: 277.1141; found: 277.1137.

### 3-(furan-2-ylmethyl)-3H-naphtho[1,2-*d*]imidazole (4ag)

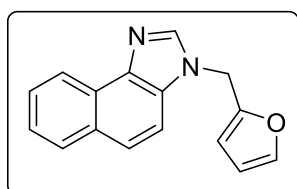

The general procedure for imidazole was followed. Column chromatography (SiO<sub>2</sub>, eluting with 90:10 hexane/acetone) afforded the desired product as a light brown gummy liquid (28 mg, 38% yield). <sup>1</sup>H NMR (400 MHz, DMSO-d<sub>6</sub>): δ 8.44-8.42 (m, 1H), 8.34 (s, 1H), 7.95 (d, *J* = 8.0 Hz, 1H), 7.80 (d, *J* = 8.8 Hz, 1H), 7.71 (d, *J* = 8.8 Hz, 1H), 7.59-7.55 (m, 2H), 7.46-7.43 (m, 1H), 6.55 (dd, *J*<sub>1</sub> = 3.2 Hz, *J*<sub>2</sub> = 0.8 Hz, 1H), 6.39 (dd, *J*<sub>1</sub> = 3.2 Hz, *J*<sub>2</sub> = 2.0 Hz, 1H), 5.62 (s, 2H); <sup>13</sup>C NMR (100 MHz, DMSO-d<sub>6</sub>): δ 150.4, 143.8, 142.4, 139.0, 130.4, 130.2, 128.9, 127.2, 126.8, 124.8, 123.8, 121.6, 112.1, 111.2, 109.5, 41.5; HRMS (ESI, *m/z*) calcd. For C<sub>16</sub>H<sub>13</sub>N<sub>2</sub>O [M+H]<sup>+</sup>: 249.1028; found: 249.1020.

### 3-cyclohexyl-1-methyl-1,3-dihydro-2*H*-naphtho[1,2-*d*]imidazol-2-one (7a)

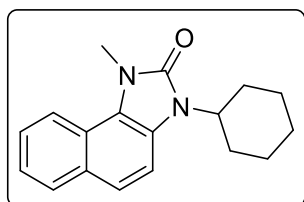

Column chromatography (SiO<sub>2</sub>, eluting with 80:20 hexane/EtOAc) afforded the desired product as a creamy white powder (134 mg, 96% yield); mp: 122-124 °C. <sup>1</sup>H NMR (400 MHz, DMSO-d<sub>6</sub>): δ 8.33 (d, *J* = 8.4 Hz, 1H), 7.87 (d, *J* = 8.4 Hz, 1H), 7.57 (d, *J* = 8.8 Hz, 1H), 7.50-7.46 (m, 2H), 7.38-7.34 (m, 1H), 4.42-4.35 (m, 1H), 3.94 (s, 3H), 2.29-2.18 (m, 2H), 1.95-1.89 (m, 4H), 1.77 (d, *J* = 12.4 Hz, 1H), 1.54-1.42 (m, 2H), 1.37-1.30 (m, 1H); <sup>13</sup>C NMR (100 MHz, DMSO-d<sub>6</sub>): δ 154.2, 129.6, 129.4, 126.1, 124.7, 123.4, 122.9, 121.7, 120.9, 120.2, 110.5, 53.6, 31.0, 30.6, 26.2, 25.5; HRMS (ESI, *m/z*) calcd. For C<sub>18</sub>H<sub>21</sub>N<sub>2</sub>O [M+H]<sup>+</sup>: 281.1654; found: 281.1649.

### *tert*-butyl 4-(3-cyclohexyl-3*H*-naphtho[1,2-*d*]imidazol-2-yl)piperazine-1-carboxylate (7b)

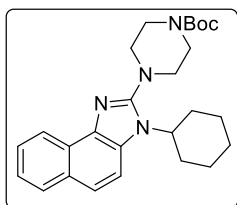

Column chromatography (SiO<sub>2</sub>, eluting with 85:15 hexane/EtOAc) afforded the desired product as a white solid (91 mg, 42% yield); mp: 172-174 °C. <sup>1</sup>H NMR (400 MHz, DMSO-d<sub>6</sub>): δ 8.54-8.52 (m, 1H), 7.86 (d, *J* = 8.0 Hz, 1H), 7.64 (d, *J* = 8.8 Hz, 1H), 7.58-7.52 (m, 2H), 7.43-7.39 (m, 1H), 4.36-4.28 (m, 1H), 3.66 (t, *J* = 4.8 Hz, 4H), 3.23 (t, *J* = 5.2 Hz, 4H), 2.31-2.21 (m, 2H), 2.01-

1.91 (m, 4H), 1.49 (s, 9H), 1.48-1.37 (m, 3H);  $^{13}\text{C}$  NMR (100 MHz, DMSO- $d_6$ ):  $\delta$  155.5, 154.9, 137.1, 129.6, 128.8, 128.2, 126.7, 125.9, 124.1, 121.8, 121.7, 112.5, 80.1, 55.8, 31.9, 28.5, 26.4, 25.6; HRMS (ESI,  $m/z$ ) calcd. For  $\text{C}_{26}\text{H}_{35}\text{N}_4\text{O}_2$   $[\text{M}+\text{H}]^+$ : 435.2760; found: 435.2750.

### 3-isopropyl-2-(4-methoxyphenyl)-3H-naphtho[1,2-d]imidazole (7c)

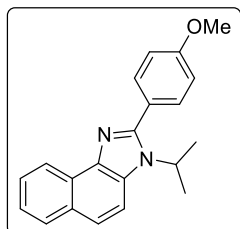

Column chromatography ( $\text{SiO}_2$ , eluting with 80:20 hexane/EtOAc) afforded the desired product as a creamy white solid (79 mg, 50% yield).  $^1\text{H}$  NMR (400 MHz, DMSO- $d_6$ ):  $\delta$  8.72-8.69 (m, 1H), 7.92 (d,  $J = 8.4$  Hz, 1H), 7.75 (d,  $J = 9.2$  Hz, 1H), 7.67-7.57 (m, 4H), 7.49-7.45 (m, 1H), 7.07-7.03 (m, 2H), 4.90-4.83 (m, 1H), 3.88 (s, 3H), 1.68 (d,  $J = 6.8$  Hz, 6H);  $^{13}\text{C}$  NMR (100 MHz, DMSO- $d_6$ ):  $\delta$  160.7, 151.6, 139.4, 131.2, 129.9, 129.8, 128.2, 127.3, 126.3, 124.6, 123.7, 122.9, 122.0, 114.3, 112.7, 55.5, 48.9, 22.0; HRMS (ESI,  $m/z$ ) calcd. For  $\text{C}_{21}\text{H}_{21}\text{N}_2\text{O}$   $[\text{M}+\text{H}]^+$ : 317.1654; found: 317.1646.

### References:

1. Begam, H. M.; Nandi, S.; Jana, R., A Directing Group Switch in Copper-Catalyzed Electrophilic C–H Amination/Migratory Annulation Cascade: Divergent Access to Benzimidazolone/Benzimidazole. *Chem. Sci.* **2022**, 13, 5726-5733.
2. Das, R.; Banerjee, M.; Rai, R. K.; Karria, R.; Roy, G., Metal-free C(sp $^2$ )–H Functionalization of Azoles:  $\text{K}_2\text{CO}_3/\text{I}_2$ -Mediated Oxidation, Imination, and Amination. *Org. Biomol. Chem.*, 2018, 16, 4243-4260.
3. McDonald, S. L.; Hendrick, C. E.; Wang, Q., Copper-Catalyzed Electrophilic Amination of Heteroarenes and Arenes by C–H Zincation. *Angew. Chem. Int. Ed.*, 2014, 53, 4667-4670.
4. Turner, G. L.; James A. Morris, J. A.; Greaney, M. F., Direct Arylation of Thiazoles on Water. *Angew. Chem. Int. Ed.*, 2007, 46, 7996-8000



HM-1522  
single pulse decoupled gated NOE

130.270  
130.053  
130.248  
129.686  
129.353  
129.686  
126.590  
124.541  
123.693  
121.786  
110.774

55.745  
33.717  
25.821  
25.480

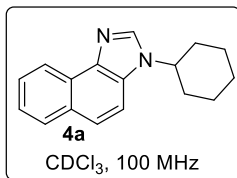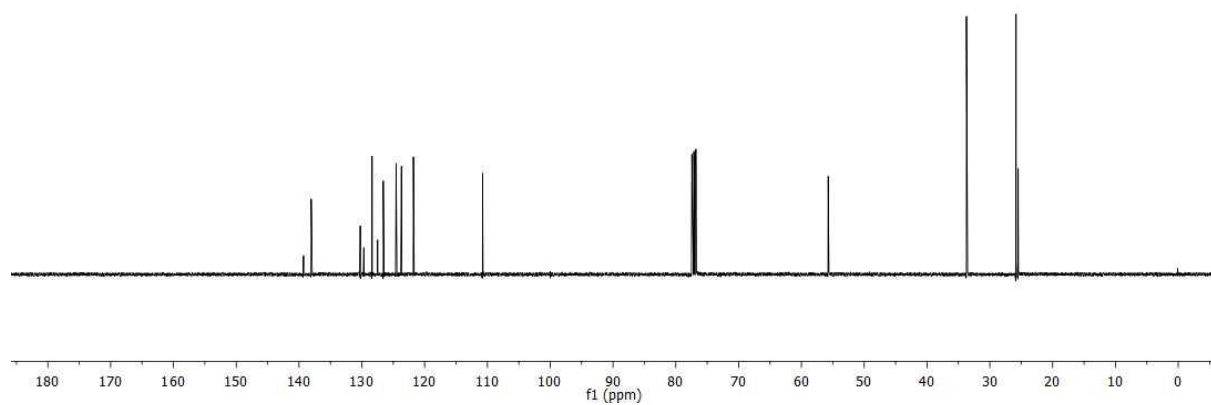

HM-1670  
single\_pulse

8.467  
8.466  
8.464  
8.462  
8.447  
8.445  
8.443  
8.442  
8.232  
9.995  
7.688  
7.686  
7.590  
7.588  
7.573  
7.570  
7.567  
7.557  
7.550  
7.494  
7.491  
7.477  
7.473  
7.470  
7.456  
7.452

4.429  
4.420  
4.410  
4.400  
4.391  
4.381  
4.371  
4.361  
4.352

2.697  
2.088  
2.025  
1.851  
1.850  
1.850  
1.850  
1.824  
1.796  
1.787  
1.708  
1.676  
1.631  
1.463  
1.429  
1.327  
1.319  
1.287  
1.254  
1.246

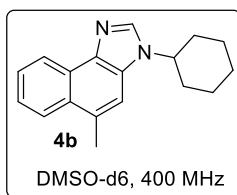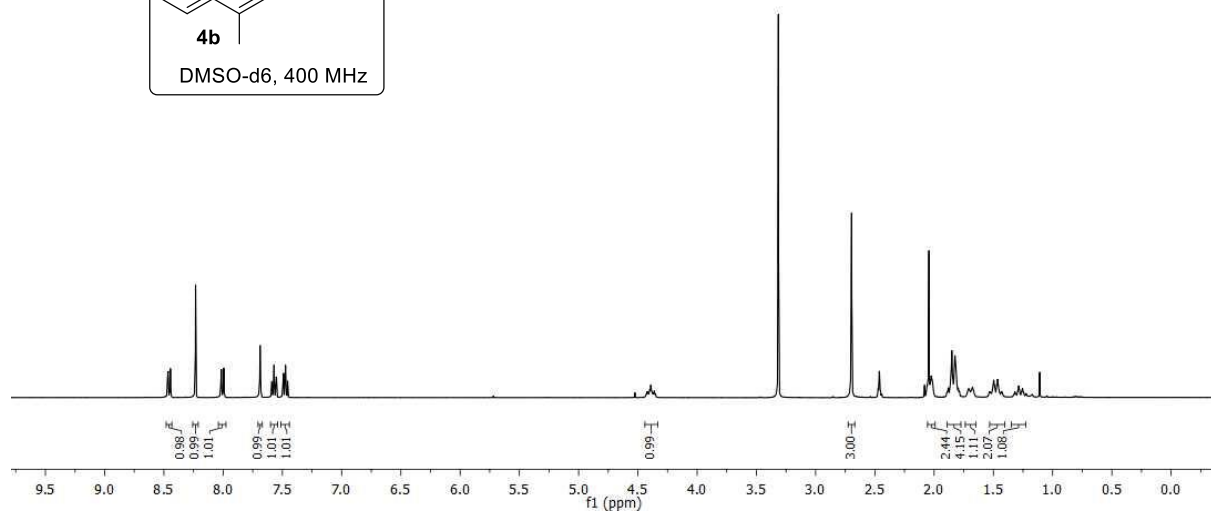

HM-1670  
single pulse decoupled gated NOE

139.203  
137.763  
129.622  
129.373  
129.365  
127.469  
126.430  
125.394  
124.595  
122.047  
112.451

54.953  
33.475  
25.748  
25.375  
20.263

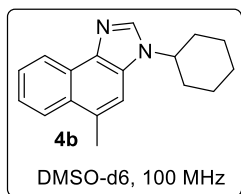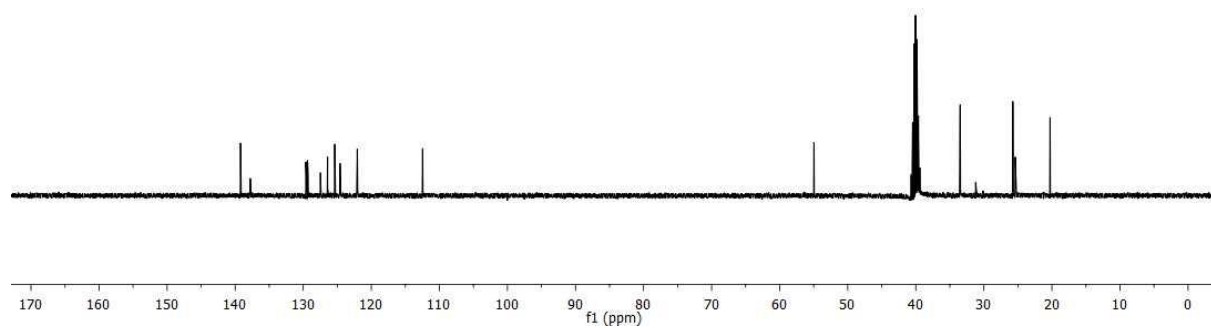

HM-1750B  
single\_pulse

8.389  
8.388  
8.387  
8.386  
8.367  
8.366  
8.364  
8.182  
8.177  
8.161  
8.159  
8.156  
8.156  
7.591  
7.588  
7.574  
7.571  
7.568  
7.554  
7.551  
7.452  
7.439  
7.415  
7.411  
7.408  
7.394  
7.390  
7.243

4.463  
4.456  
4.427  
4.417  
4.397  
4.388  
4.014

2.062  
2.054  
2.041  
2.031  
1.849  
1.845  
1.815  
1.787  
1.778  
1.756  
1.742  
1.706  
1.674  
1.647  
1.547  
1.477  
1.468  
1.443  
1.309  
1.302  
1.270  
1.238  
1.229  
1.205

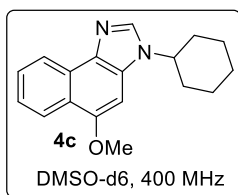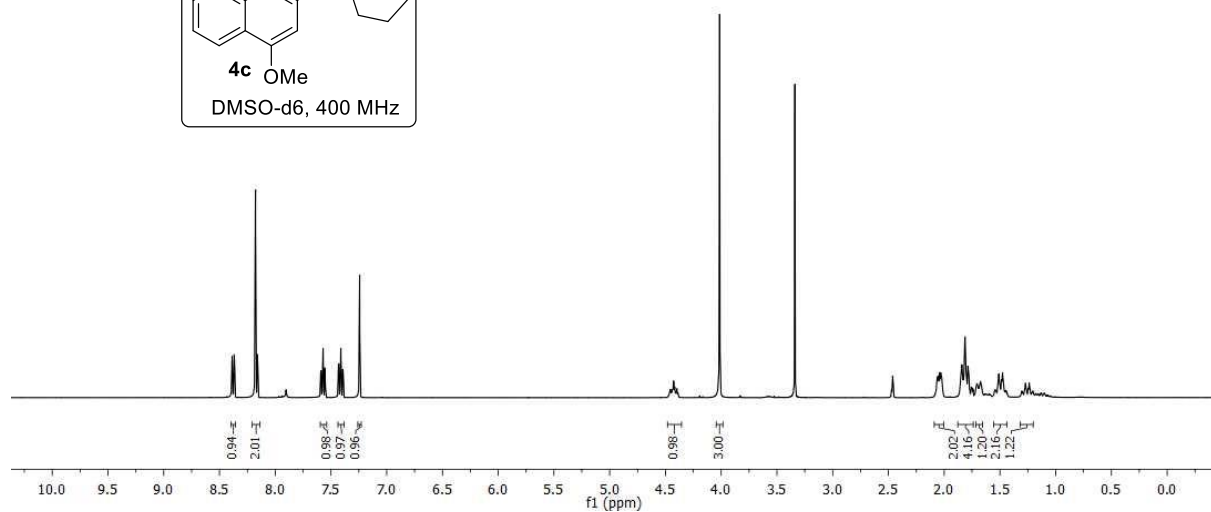

HM-1750B  
single pulse decoupled gated NOE

152.361  
138.279  
132.873  
130.010  
127.559  
127.320  
124.073  
123.536  
122.930  
121.537  
91.290  
56.605  
54.485  
33.562  
25.749  
25.413

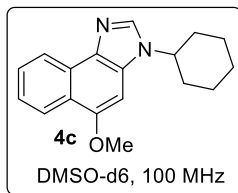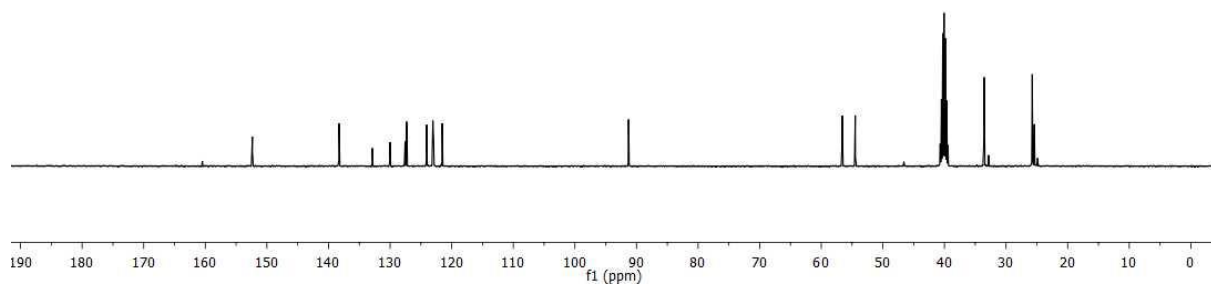

HM-1550A  
single\_pulse

8.468  
8.464  
8.448  
8.445  
8.338  
8.059  
8.038  
7.831  
7.803  
7.683  
7.660  
7.655  
7.660  
7.645  
7.642  
7.556  
7.553  
7.539  
7.535  
7.512  
7.518  
7.515  
4.446  
4.436  
4.407  
4.387  
4.378  
4.368  
2.046  
2.041  
2.037  
2.015  
2.007  
1.872  
1.864  
1.834  
1.808  
1.779  
1.660  
1.650  
1.521  
1.487  
1.454  
1.446  
1.420  
1.413  
1.389  
1.277  
1.245  
1.236  
1.212

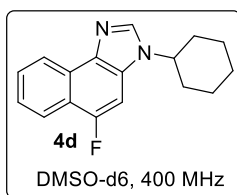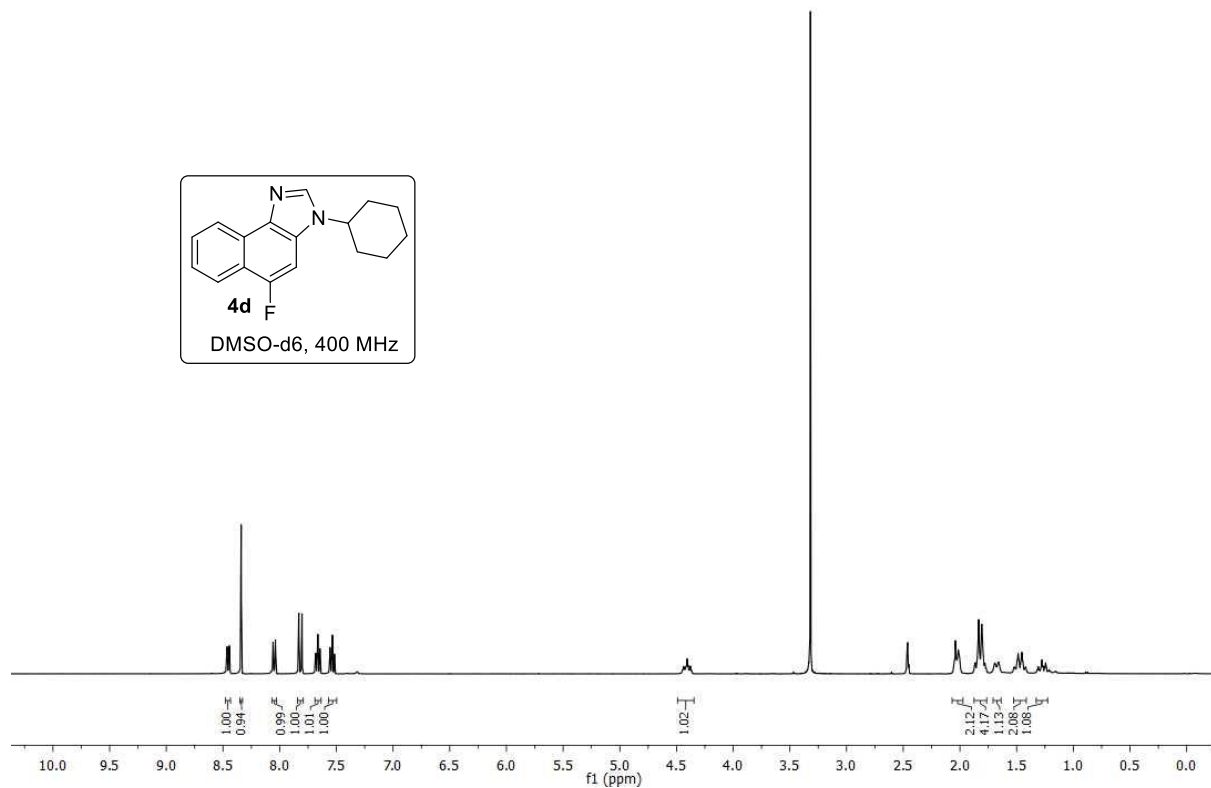

HM-1550A  
single pulse decoupled gated NOE

156.442  
154.020  
140.298  
135.207  
128.781  
127.940  
127.940  
127.339  
127.277  
125.205  
125.192  
121.896  
121.869  
121.400  
120.362  
120.207  
97.306  
97.039  
55.136  
33.950  
25.673  
25.290

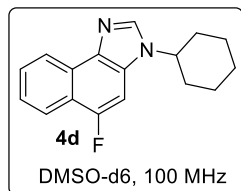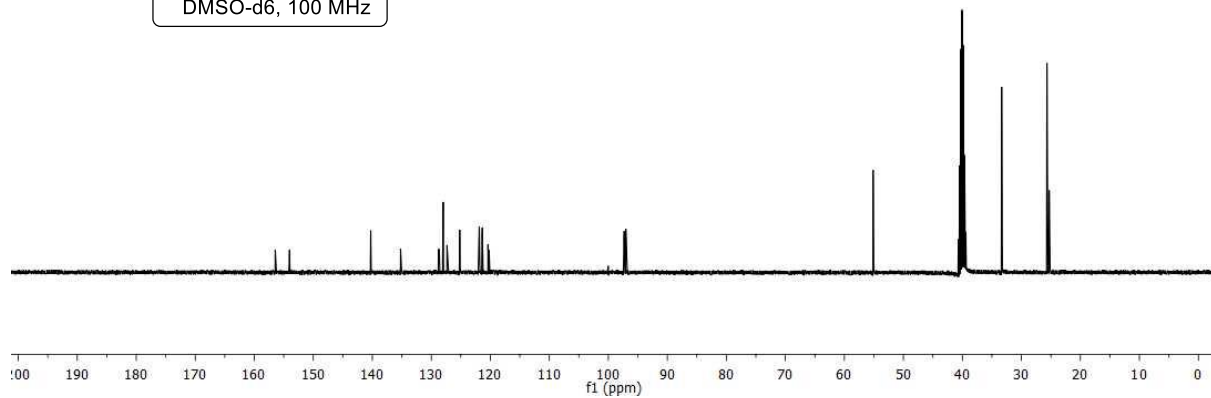

HM-1550A  
1D 19F experiment

126.509

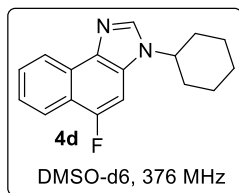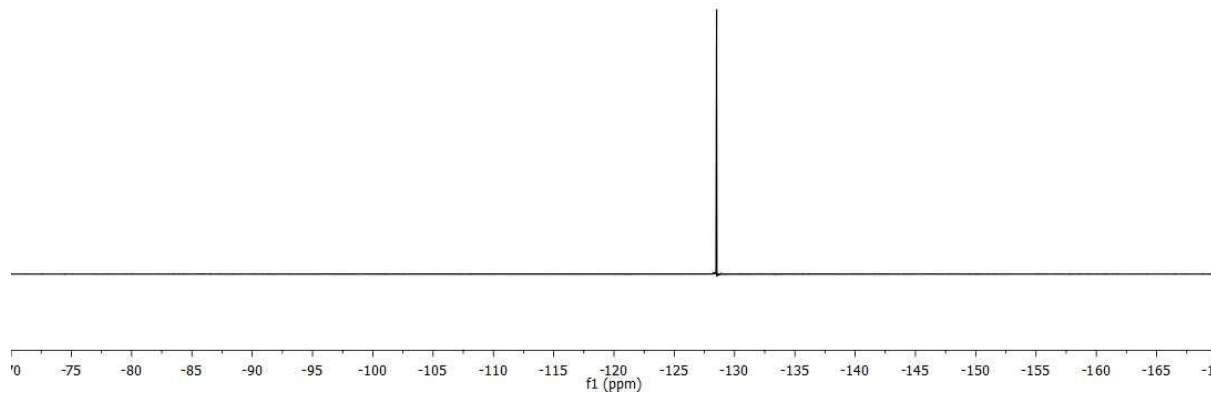



HM-1775  
1D 19F experiment

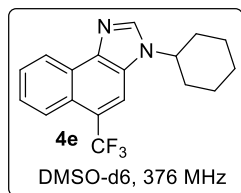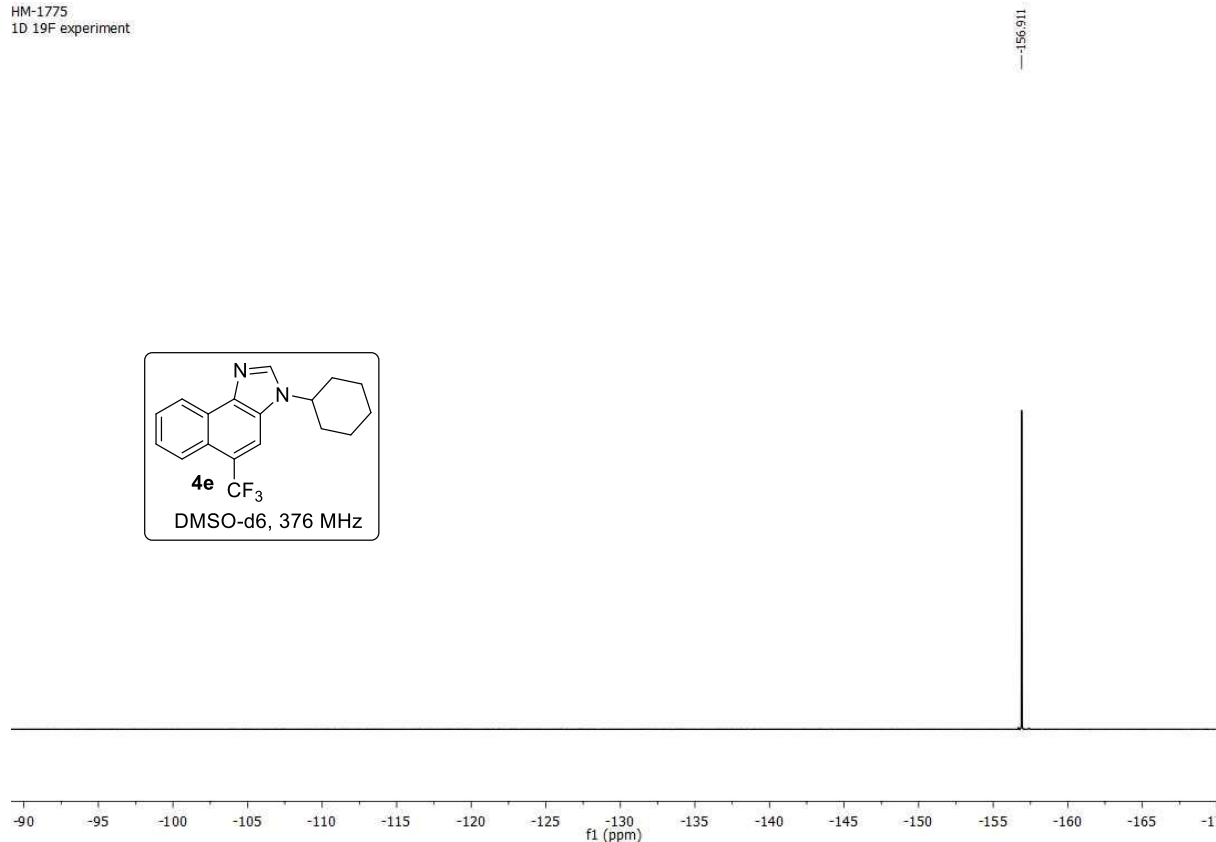

15y-HM-1775/1  
HM-1775 1H-NMR in DMSO

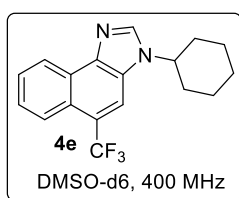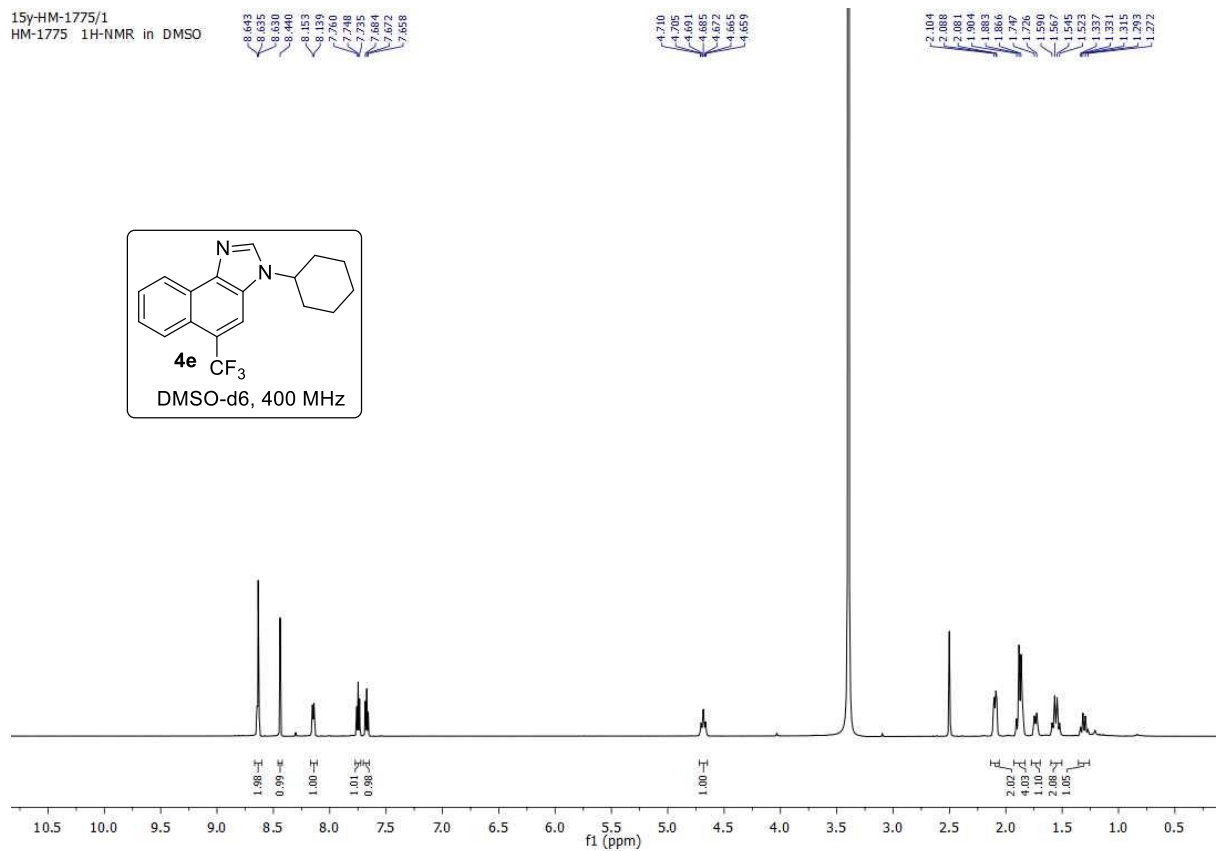

15y-HM-1775/2  
HM-1775 13C NMR in DMSO scans 20

142.009  
141.869  
127.951  
127.082  
126.154  
125.991  
124.715  
124.364  
124.115  
122.147  
119.242  
119.029  
118.840  
118.664  
112.304  
112.245  
112.201  
112.170

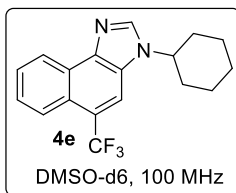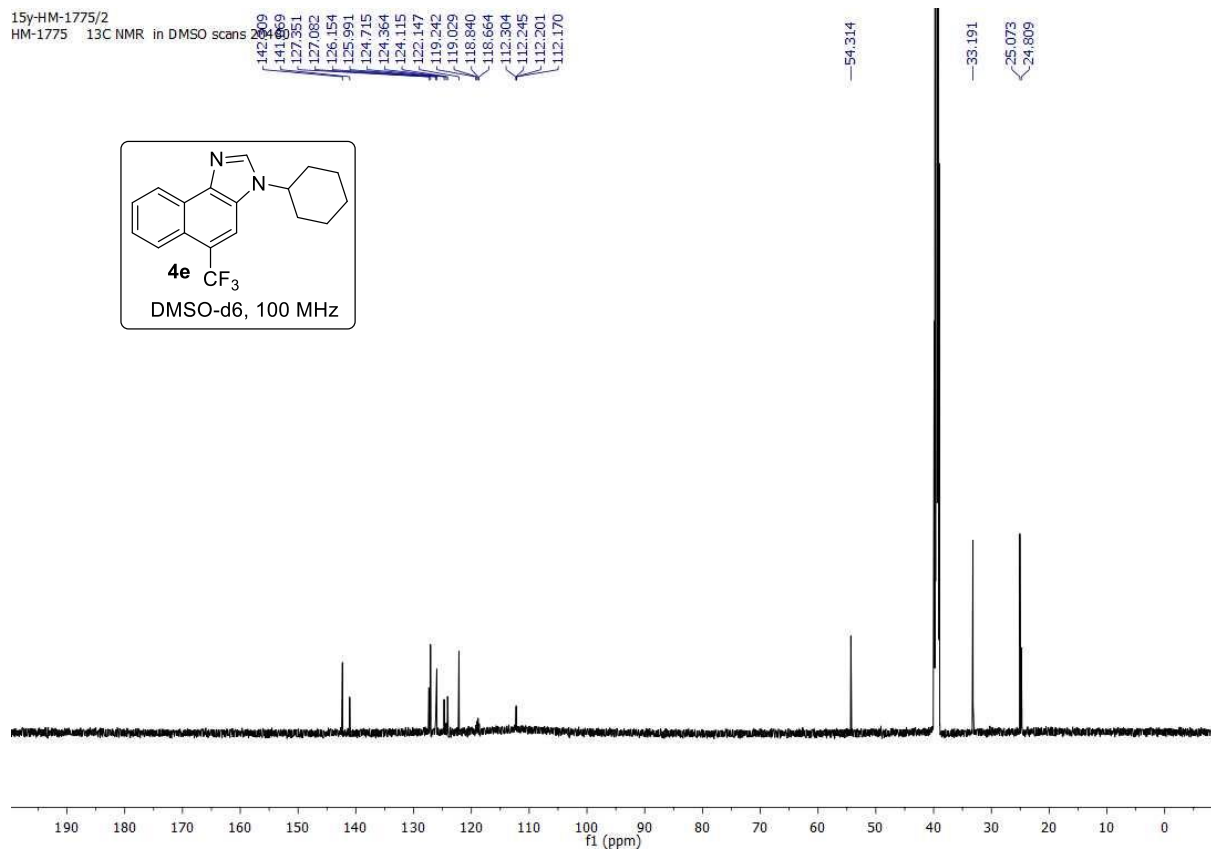

HM-1788  
single\_pulse

8.826  
8.804  
8.567  
8.563  
8.548  
8.545  
8.541  
8.482  
7.655  
7.641  
7.638  
7.634  
7.631  
7.617  
7.584  
7.580  
7.567  
7.563  
7.559  
7.545  
7.542

4.588  
4.589  
4.570  
4.560  
4.541  
4.531  
4.521

3.935

2.076  
2.070  
2.048  
2.032  
1.885  
1.877  
1.847  
1.821  
1.793  
1.768  
1.677  
1.562  
1.534  
1.527  
1.494  
1.486  
1.461  
1.390  
1.236  
1.229  
1.205  
1.198

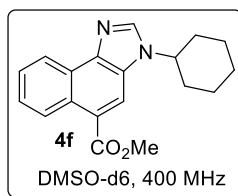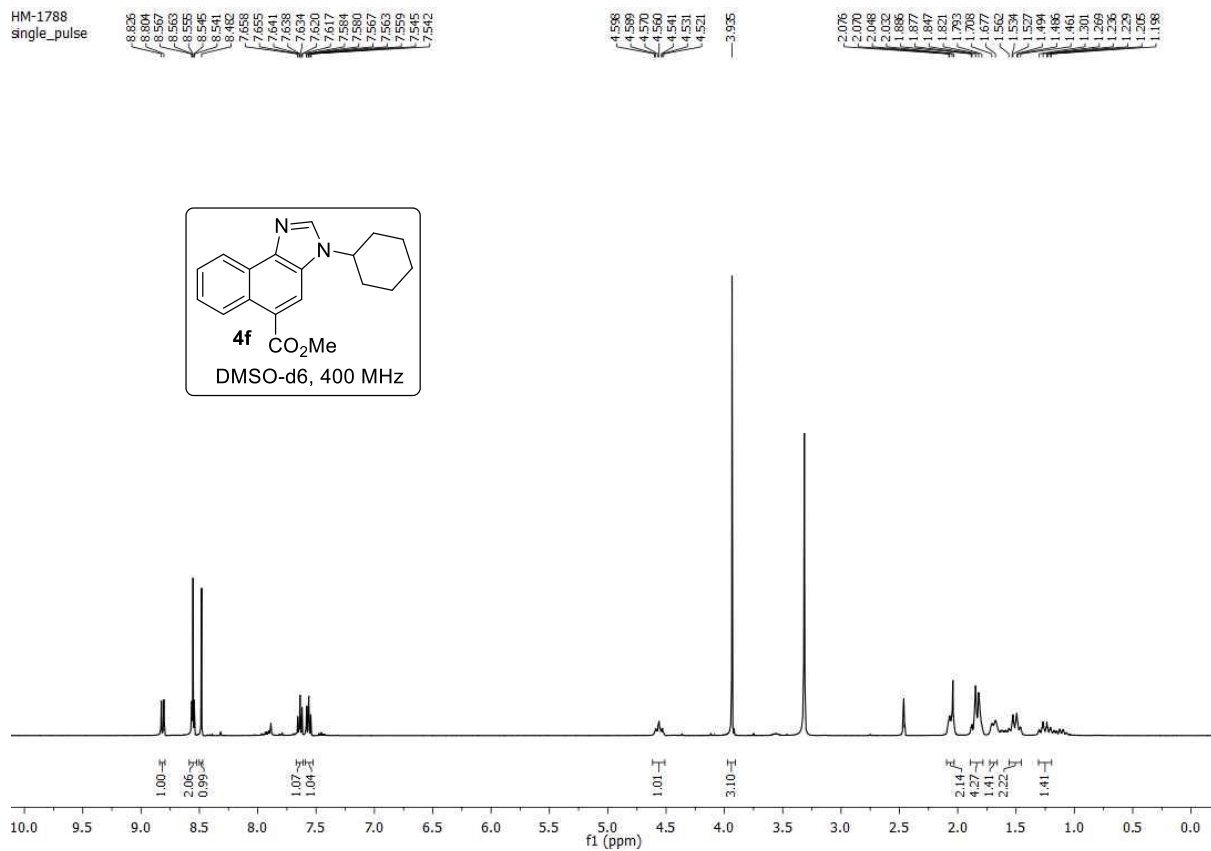

HM-1788  
single pulse decoupled gated N<sup>15</sup>

166.845  
142.928  
142.172  
126.388  
127.665  
127.038  
126.630  
126.196  
122.219  
121.952  
116.818

54.934  
52.730  
33.687  
25.601  
25.382

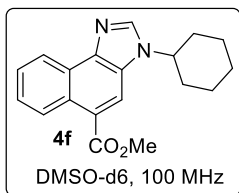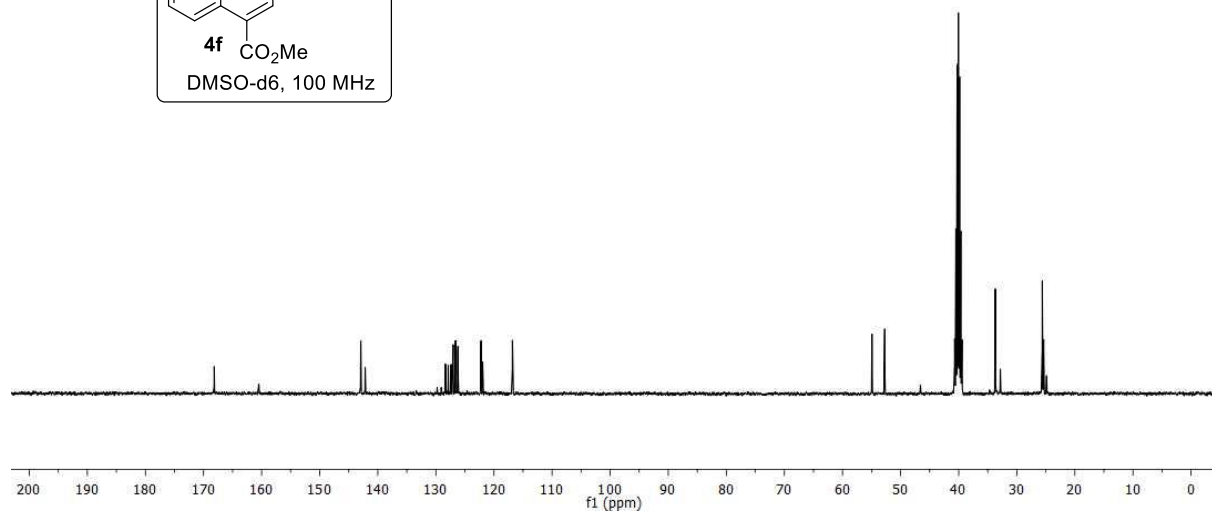

HM-1664ac  
single\_pulse

8.065  
8.061  
8.057  
8.060  
8.045  
8.043  
8.042  
8.040  
8.037  
8.035  
8.035  
8.033  
8.026  
8.026  
8.025  
8.283  
8.282  
8.281  
8.280  
8.285  
7.674  
7.671  
7.656  
7.653  
7.650  
7.649  
7.649  
7.591  
7.587  
7.573  
7.570  
7.566

4.244  
4.235  
4.225  
4.214  
4.186  
4.184  
4.182  
4.166  
2.246  
2.241  
2.237  
2.217  
2.213  
2.208  
2.208  
1.997  
1.989  
1.985  
1.947  
1.840  
1.824  
1.815  
1.793  
1.784  
1.552  
1.556  
1.524  
1.490  
1.449  
1.449  
1.372  
1.371  
1.331  
1.326  
1.298  
1.289

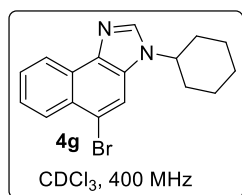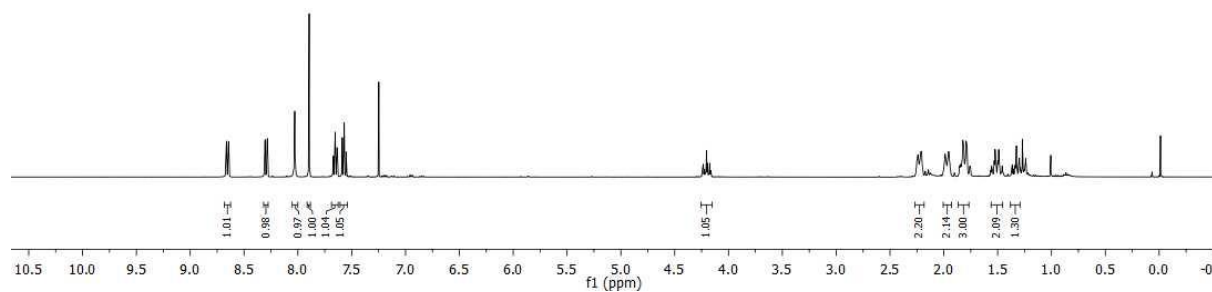

HM-1664ac  
single pulse decoupled gated NOE

139.040  
138.529  
128.608  
128.530  
127.886  
127.886  
127.413  
125.865  
122.188  
117.652  
114.948

55.941

33.700

25.745  
25.376

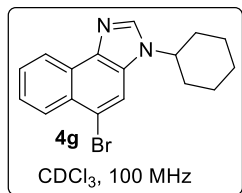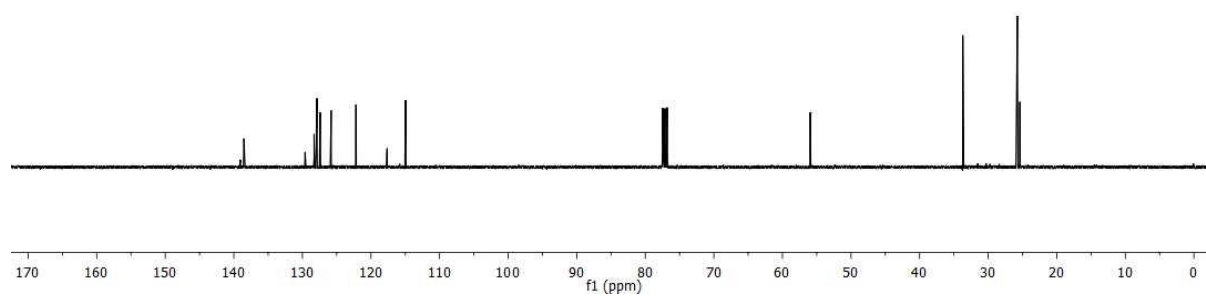

HM-1554  
single pulse

8.715  
8.714  
8.712  
8.711  
8.695  
8.693  
8.692  
8.690  
8.688  
8.130  
8.129  
8.119  
8.111  
8.109  
8.108  
8.051  
7.677  
7.675  
7.673  
7.671  
7.659  
7.656  
7.642  
7.638  
7.635  
7.621  
7.616  
7.608  
7.598  
7.594  
7.550  
7.491  
7.487  
7.474  
7.470  
7.465  
7.452  
7.449  
7.449  
6.726  
6.724  
6.722  
6.720  
6.720  
4.306  
4.295  
4.292  
4.286  
4.266  
4.255  
4.246  
4.237  
4.237  
2.287  
2.282  
2.279  
2.276  
2.266  
2.249  
2.012  
2.004  
1.996  
1.970  
1.970  
1.962  
1.899  
1.890  
1.880  
1.869  
1.859  
1.837  
1.828  
1.806  
1.797  
1.580  
1.571  
1.569  
1.559  
1.472  
1.464  
1.394  
1.385  
1.353  
1.321  
1.321  
1.312

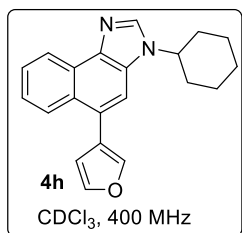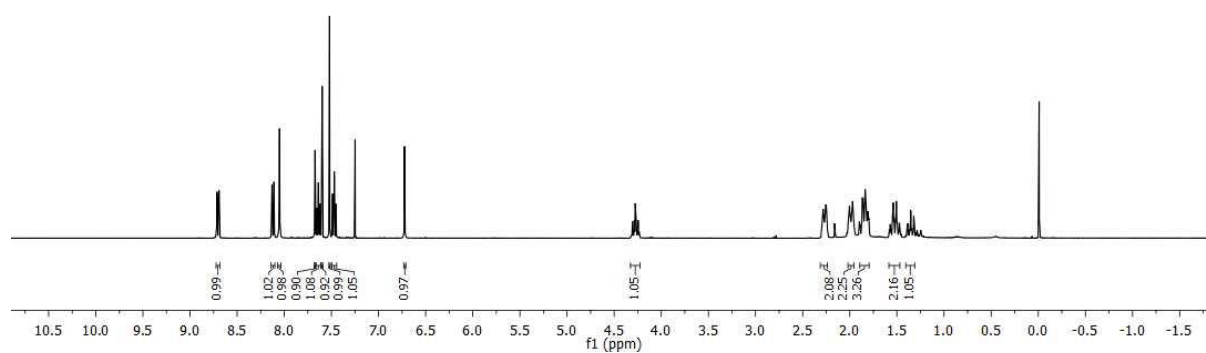

HM-1554  
single pulse decoupled gated NOE

143.909  
146.539  
139.060  
138.268  
128.214  
127.676  
126.628  
126.475  
125.521  
124.758  
122.137  
113.026  
111.672

55.731

33.771

25.823  
25.452

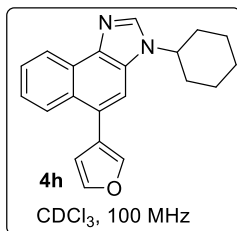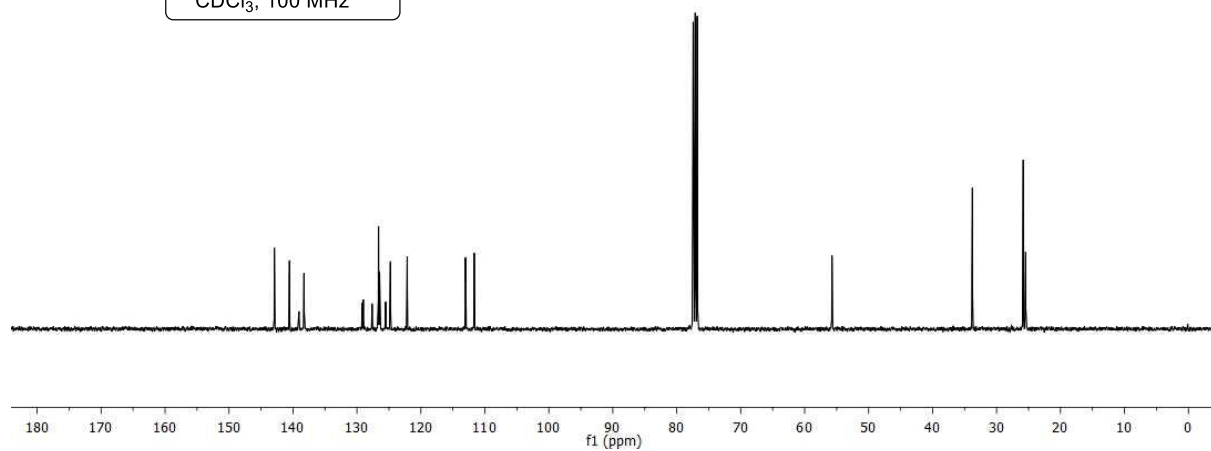

HM-1760  
single\_pulse

8.514  
8.495  
8.488  
8.439  
8.419  
8.414  
7.686  
7.670  
7.649  
7.631  
7.611  
7.594  
7.471  
7.466  
7.452  
7.418  
7.401

4.565  
4.537

2.081  
2.058  
1.900  
1.867  
1.857  
1.715  
1.684  
1.563  
1.529  
1.497  
1.465  
1.330  
1.266  
1.234

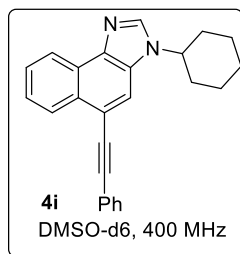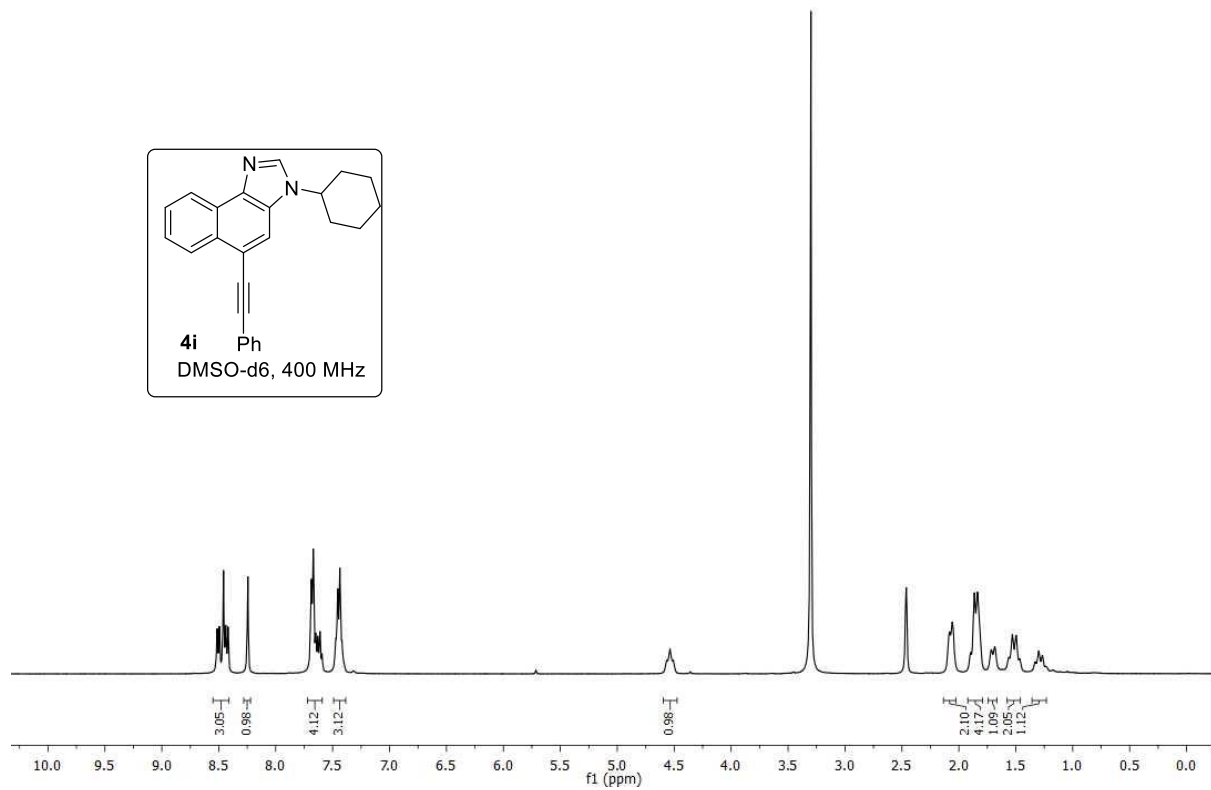

HM-1760  
single pulse decoupled gated NOE

141.605  
139.806  
131.861  
129.433  
129.394  
129.251  
127.463  
126.819  
125.884  
125.187  
117.007  
114.650

93.697  
88.899

55.015

33.566  
25.682  
25.355

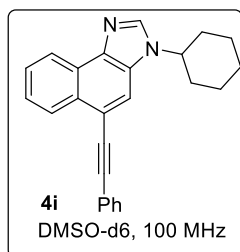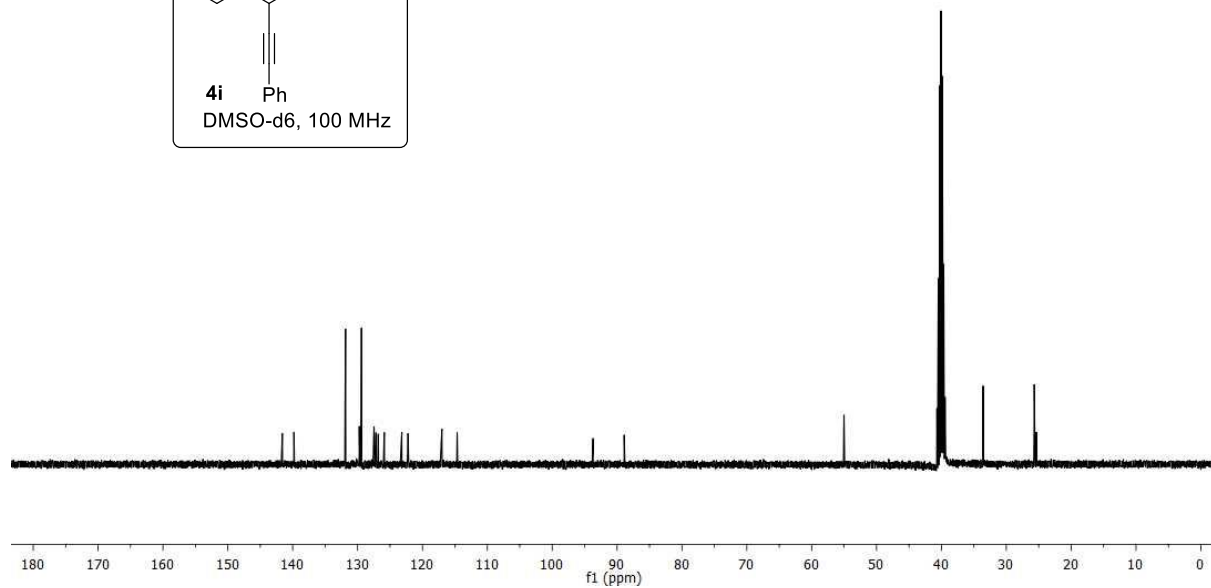

HM-1761  
single\_pulse

8.546  
8.526  
8.382  
7.765  
7.744  
7.723  
7.607  
7.588  
7.566  
7.512  
7.462  
7.386

4.514  
4.488  
4.463

2.065  
2.044  
2.039  
1.877  
1.845  
1.818  
1.796  
1.648  
1.508  
1.476  
1.445  
1.414  
1.295  
1.260  
1.229

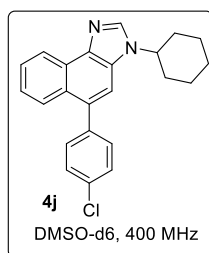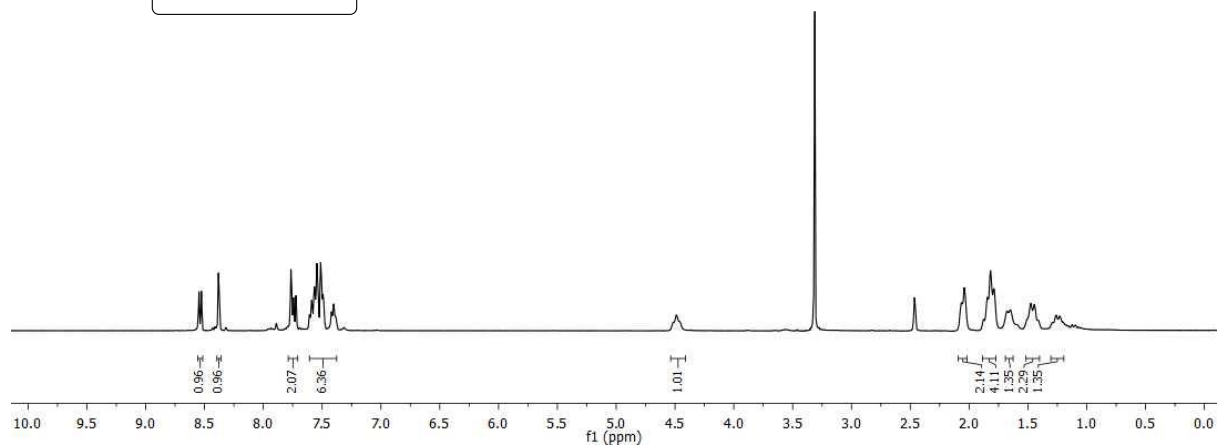

HM-1761  
single pulse decoupled gated NOE

140.399  
140.062  
138.702  
133.894  
132.639  
132.416  
128.860  
128.181  
127.538  
126.750  
126.489  
125.022  
122.148  
115.219

54.868

33.568

25.669  
25.365

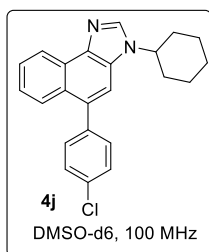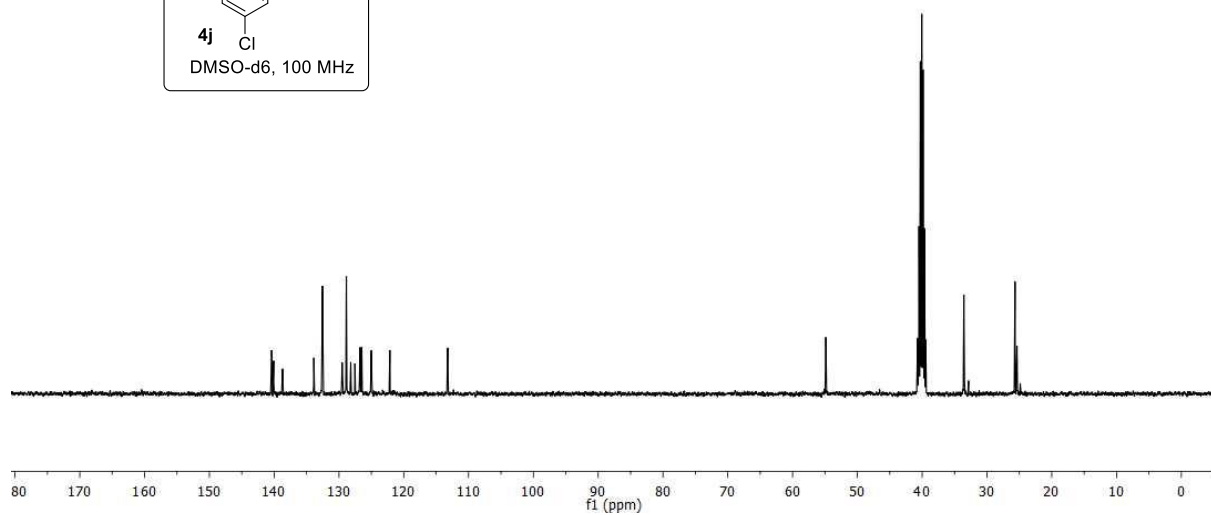

HM-1557  
single\_pulse

8.546  
8.544  
8.542  
8.541  
8.535  
8.523  
8.522  
8.520  
8.485  
8.172  
8.171  
8.148  
8.147  
8.049  
7.813  
7.811  
7.808  
7.806  
7.805  
7.661  
7.657  
7.644  
7.640  
7.637  
7.623  
7.620  
7.527  
7.525  
7.525  
7.522  
7.522  
7.565  
7.504  
7.502  
7.500  
7.475  
7.472  
7.459  
7.458  
7.455  
7.434  
6.580  
6.575  
6.570  
4.571  
4.562  
4.533  
4.504  
4.495

2.063  
2.078  
2.050  
2.062  
1.990  
1.871  
1.843  
1.809  
1.697  
1.666  
1.541  
1.438  
1.466  
1.427  
1.327  
1.318  
1.286  
1.253  
1.245

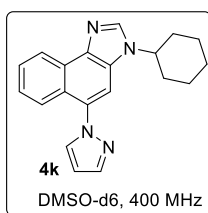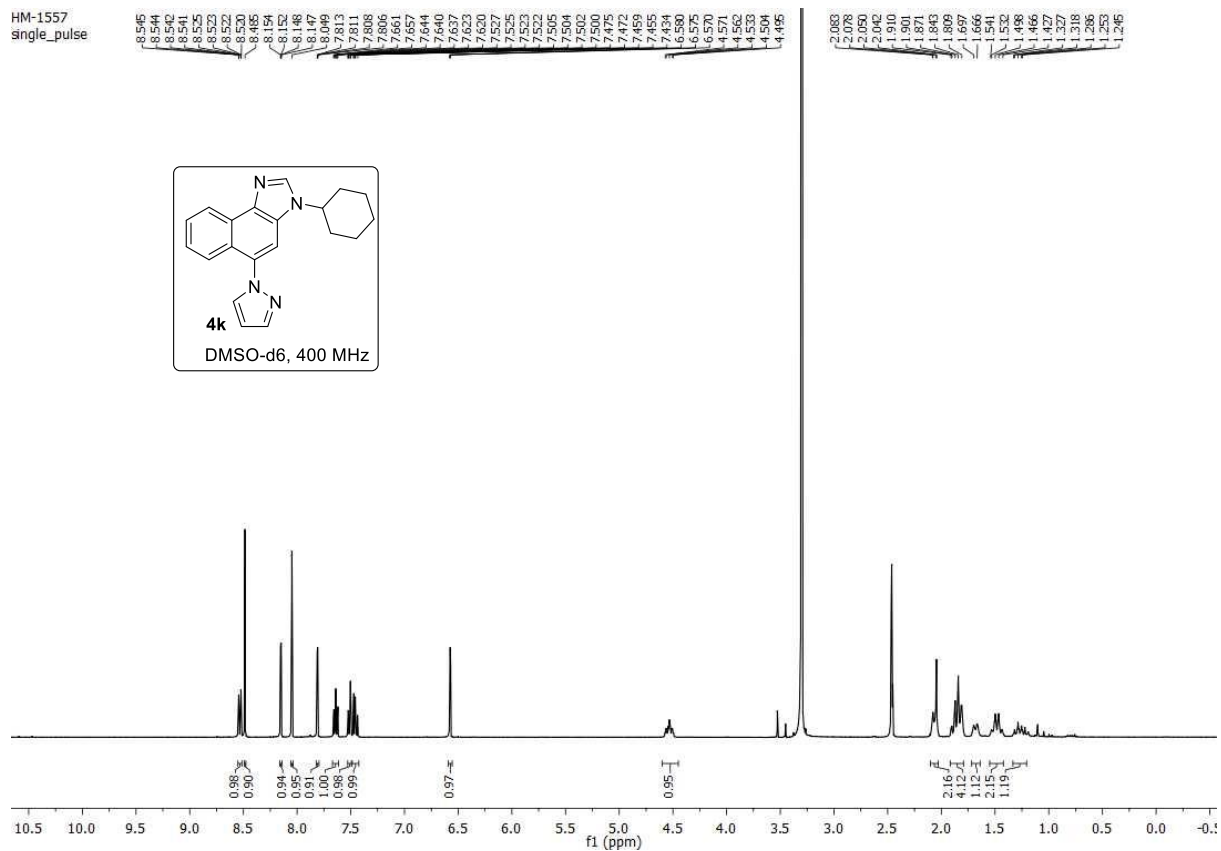

HM-1557  
single pulse decoupled gated NOE

141.431  
140.802  
138.814  
133.619  
133.117  
128.738  
127.449  
127.169  
126.490  
124.287  
121.980

110.899  
106.797

55.010

33.579

25.649  
25.319

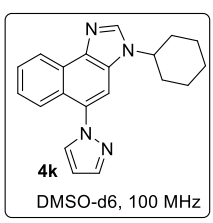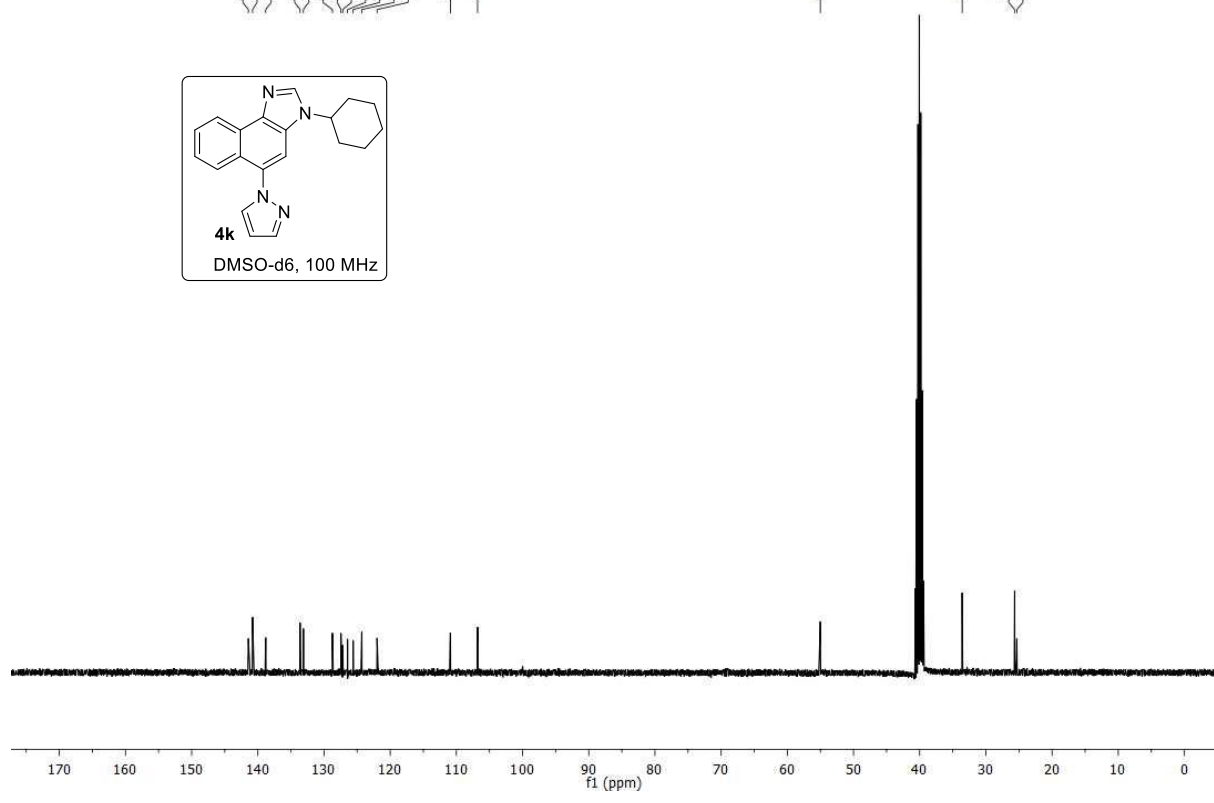

HM-1778  
single\_pulse

8.833  
8.828  
8.822  
8.818  
8.794  
8.792  
8.789  
8.788  
8.773  
8.772  
8.769  
8.767  
8.456  
8.452  
8.062  
7.836  
7.803  
7.574  
7.564  
7.554  
7.543

4.501  
4.492  
4.482  
4.472  
4.462  
4.453  
4.443  
4.433

2.048  
2.019  
2.019  
1.887  
1.878  
1.856  
1.847  
1.822  
1.794  
1.686  
1.685  
1.524  
1.515  
1.481  
1.449  
1.415  
1.301  
1.293  
1.260  
1.252  
1.219

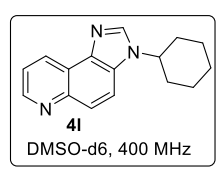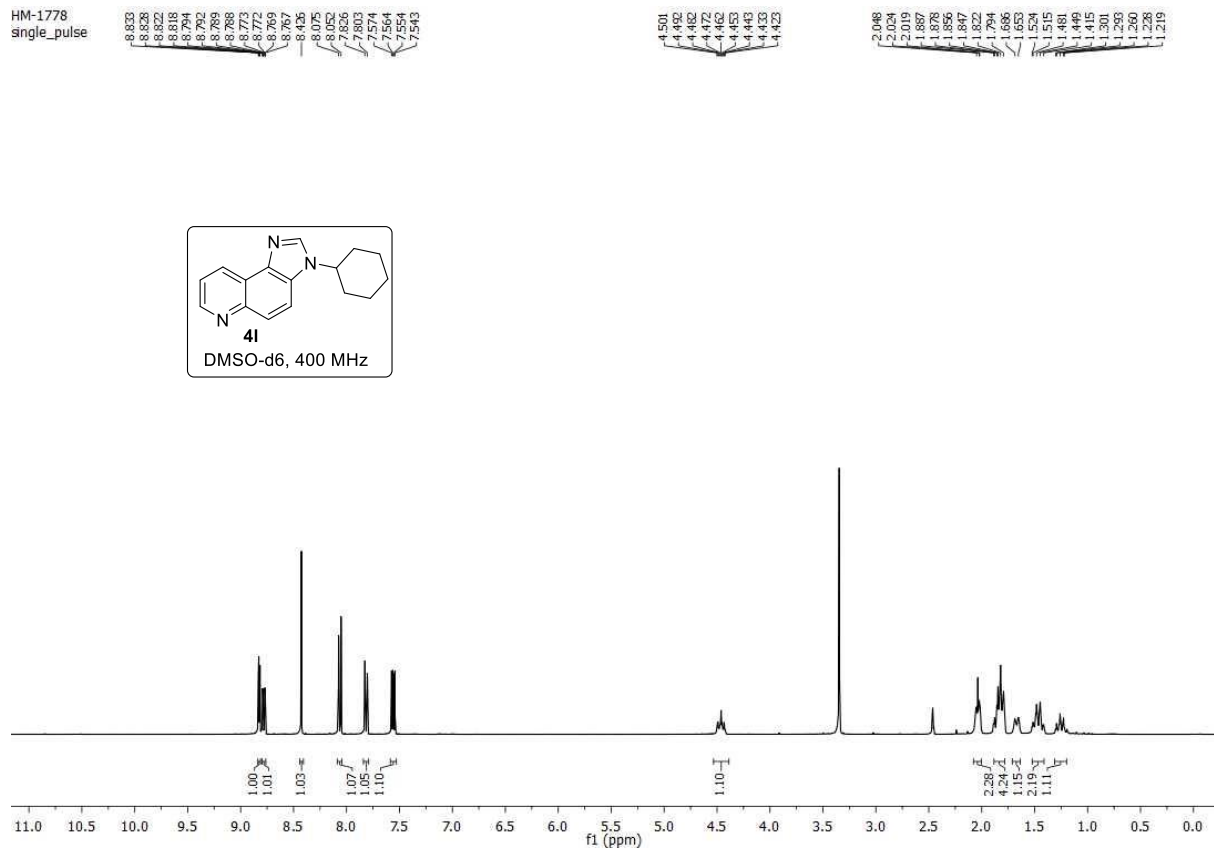



HM-1778  
single pulse decoupled gated NOE

148.656  
145.917  
141.134  
138.362  
129.871  
129.807  
124.238  
122.313  
121.843  
115.482

55.192

33.443

25.671  
25.324

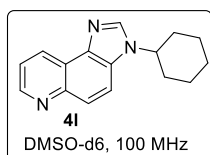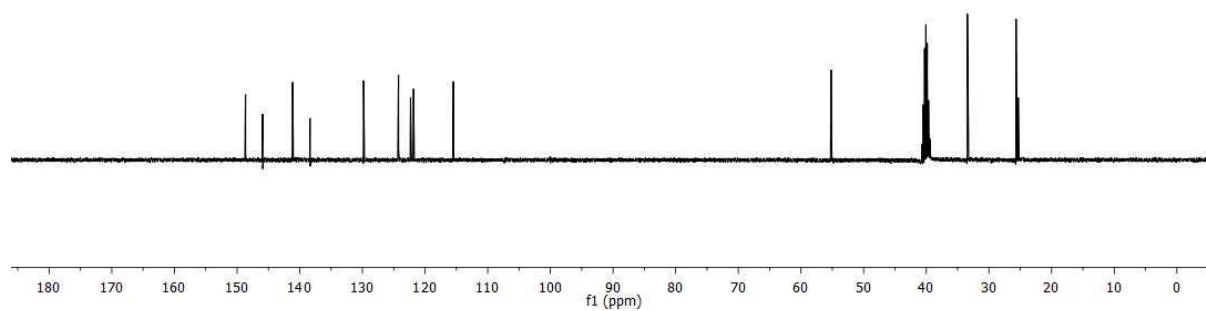

HM-1796-1  
single\_pulse

8.356  
8.290  
8.269  
8.031  
8.028  
8.010  
5.907  
5.856  
7.759  
7.683  
7.661  
7.646  
7.642  
7.628  
7.625  
7.621  
7.607  
7.604  
7.496  
7.493  
7.479  
7.476  
7.473  
7.458  
7.456

4.911  
4.903  
4.883  
4.875  
4.866  
4.856  
4.838

2.275  
2.245  
1.890  
1.859  
1.854  
1.834  
1.796  
1.772  
1.727  
1.655  
1.647  
1.623  
1.615  
1.585  
1.325  
1.293  
1.261

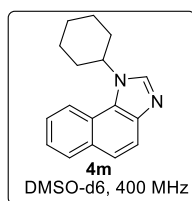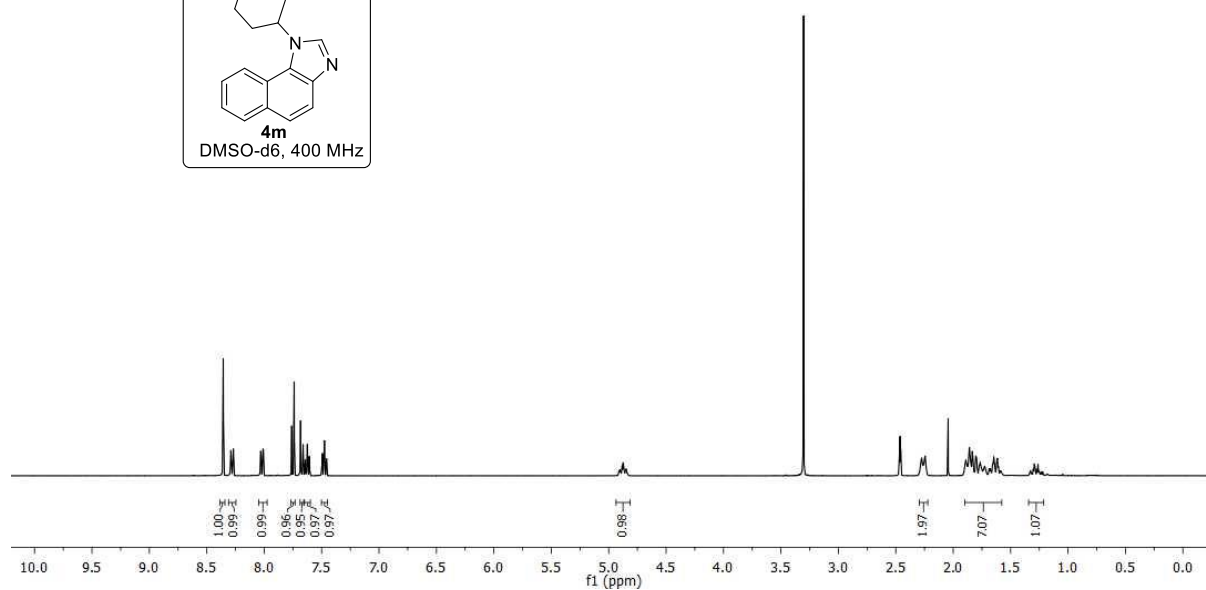

HM-1796-[1]  
single pulse decoupled gated NOE

141.1616  
140.347  
131.359  
129.891  
127.310  
126.830  
124.468  
122.888  
122.390  
120.981  
120.594

56.944

33.827

25.597  
25.587

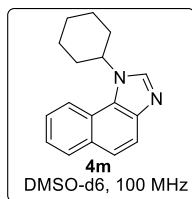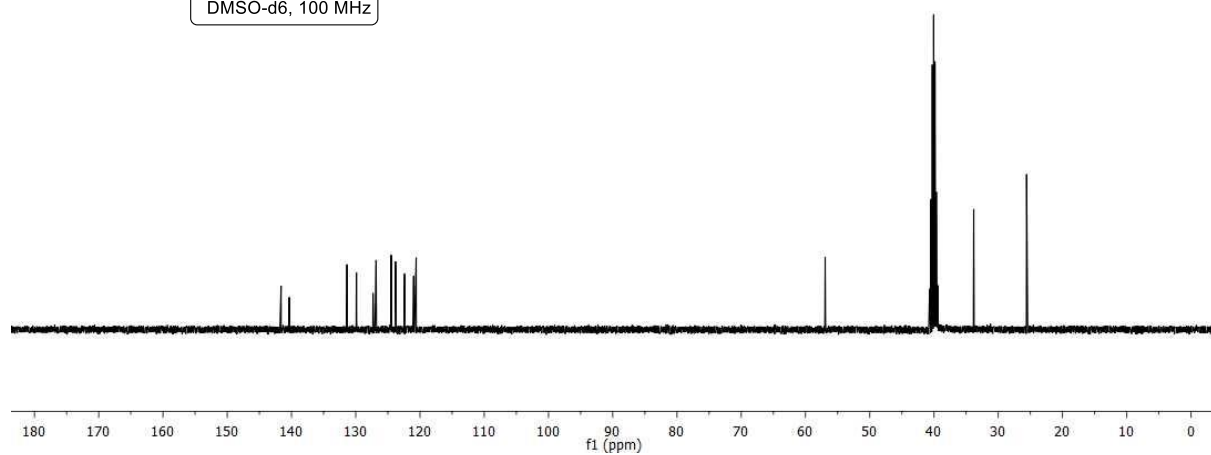

HM-1779  
single\_pulse

8.848  
8.844  
8.837  
8.828  
8.820  
8.671  
8.450  
8.005  
7.983  
7.812  
7.790  
7.638  
7.616  
7.606

4.905  
4.898  
4.869  
4.869  
4.840

2.249  
2.221  
1.880  
1.864  
1.840  
1.779  
1.757  
1.650  
1.638  
1.627  
1.595  
1.328  
1.323  
1.299  
1.291  
1.269  
1.259  
1.250

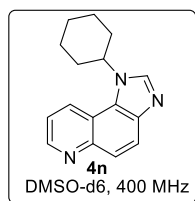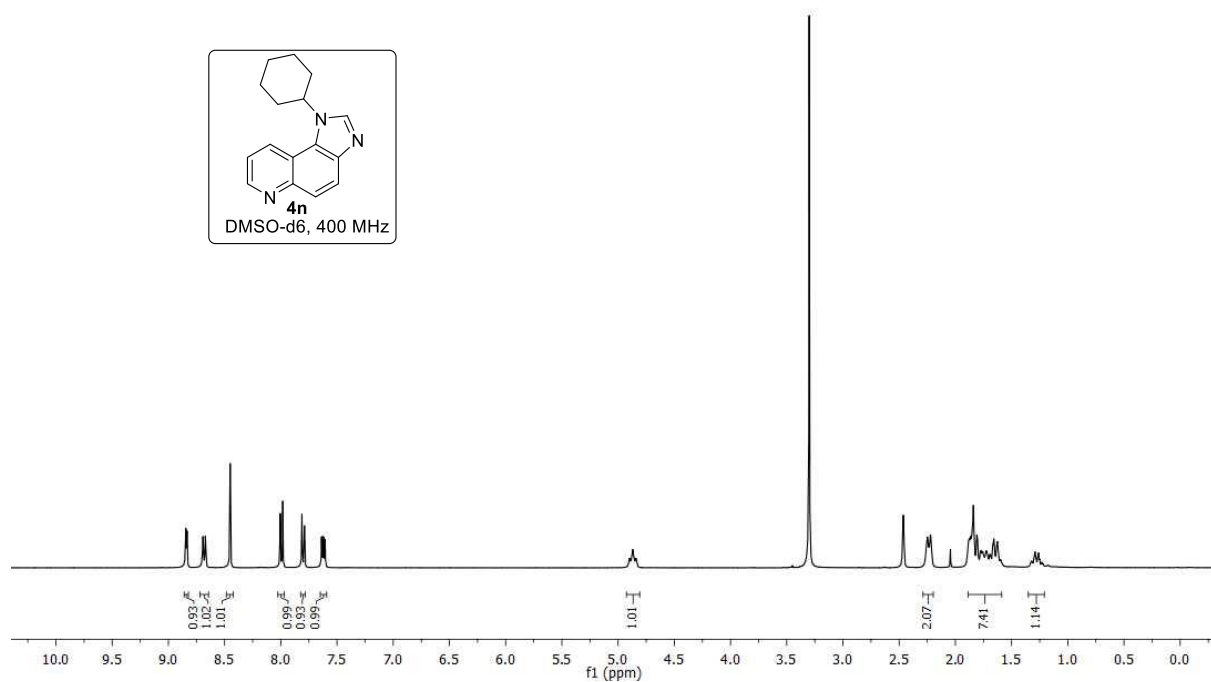

HM-1779

single pulse decoupled gated NOE

148.105  
146.510  
141.444  
141.262  
129.465  
126.594  
124.859  
123.857  
121.512  
117.519

56.808

33.606

25.554  
25.478

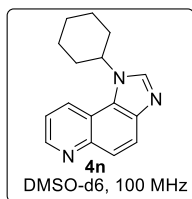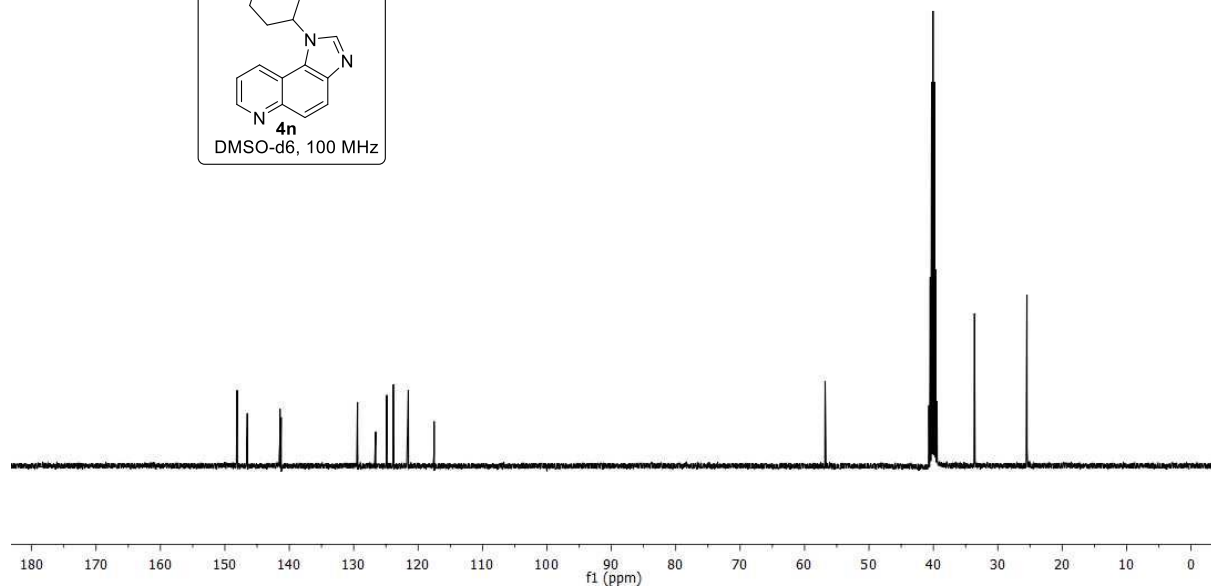

HM-1558  
single\_pulse

8.797  
8.650  
8.364  
8.203  
8.150  
8.057  
8.057  
7.824  
7.802  
7.746  
7.723  
7.567  
7.564  
7.561  
7.557  
7.531  
7.531  
7.526  
7.506  
7.490

5.125  
5.120  
5.110  
5.102  
5.075  
5.069

2.368  
2.338  
1.933  
1.900  
1.872  
1.862  
1.818  
1.804  
1.770  
1.373  
1.341  
1.318  
1.309  
1.275

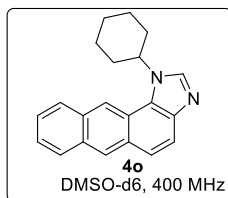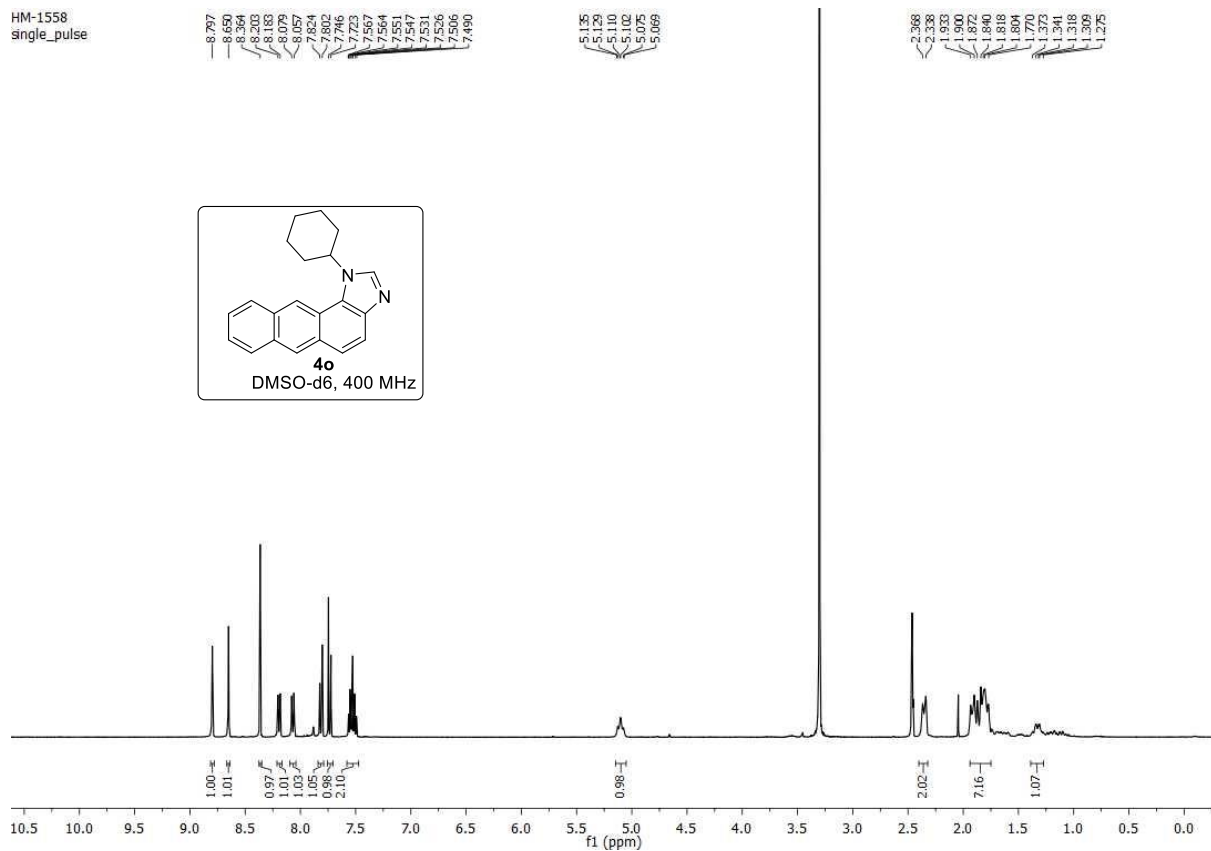

HM-1558  
single pulse decoupled gated NOE

140.996  
139.629  
131.591  
130.490  
130.056  
128.933  
128.271  
126.438  
126.290  
125.831  
124.478  
121.874  
121.454  
118.982

57.004

33.874

25.662  
25.488

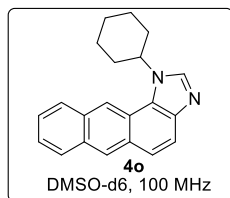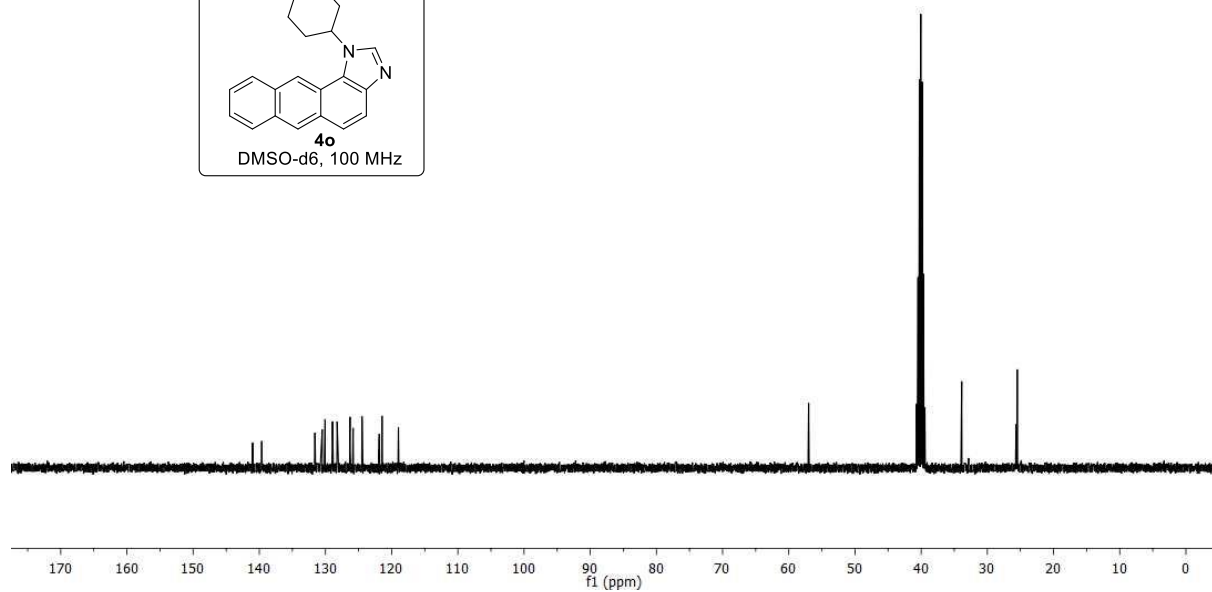

KKP-280  
single\_pulse

8.440  
8.438  
8.436  
8.419  
8.417  
8.415  
8.354  
7.679  
7.565  
7.560  
7.550  
7.545  
7.540  
7.529  
7.525  
7.405  
7.385  
7.240  
7.223  
7.218  
7.206  
7.203  
7.186

4.436  
4.427  
4.397  
4.388  
4.368  
4.360  
4.262  
4.245  
4.227  
4.209

2.453  
2.436

2.021  
1.999  
1.861  
1.827  
1.811  
1.794  
1.683  
1.653  
1.588  
1.570  
1.505  
1.472  
1.439  
1.356  
1.223  
1.176  
0.860  
0.824

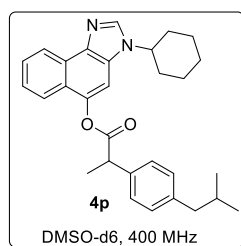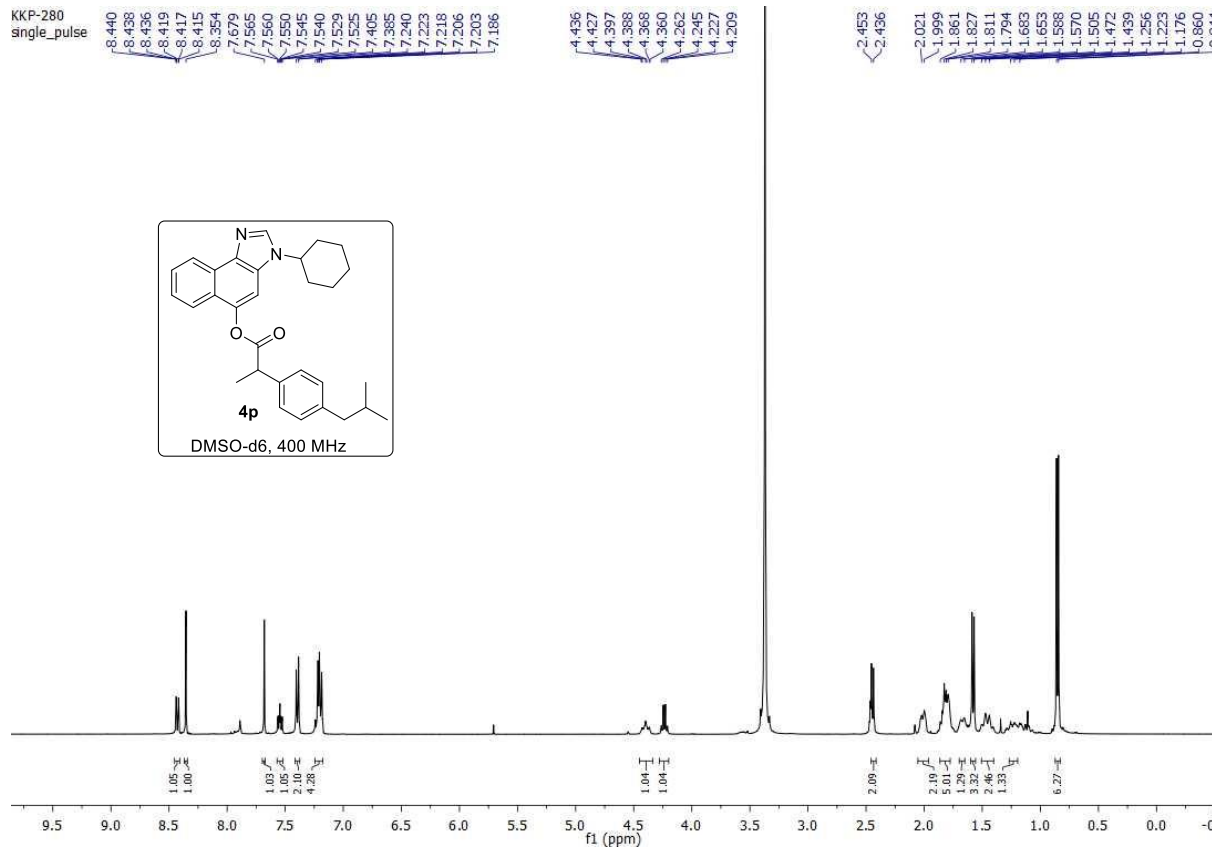

KKP-280  
single pulse decoupled gated NOE

177.775

160.511

142.611  
140.919  
140.467  
137.949  
136.770  
129.916  
128.888  
128.078  
127.294  
126.581  
123.672  
118.196

105.426

55.040

44.858  
44.759

33.499  
33.475  
33.823  
30.221  
25.647  
25.317  
22.659  
22.643  
18.586

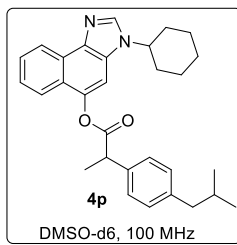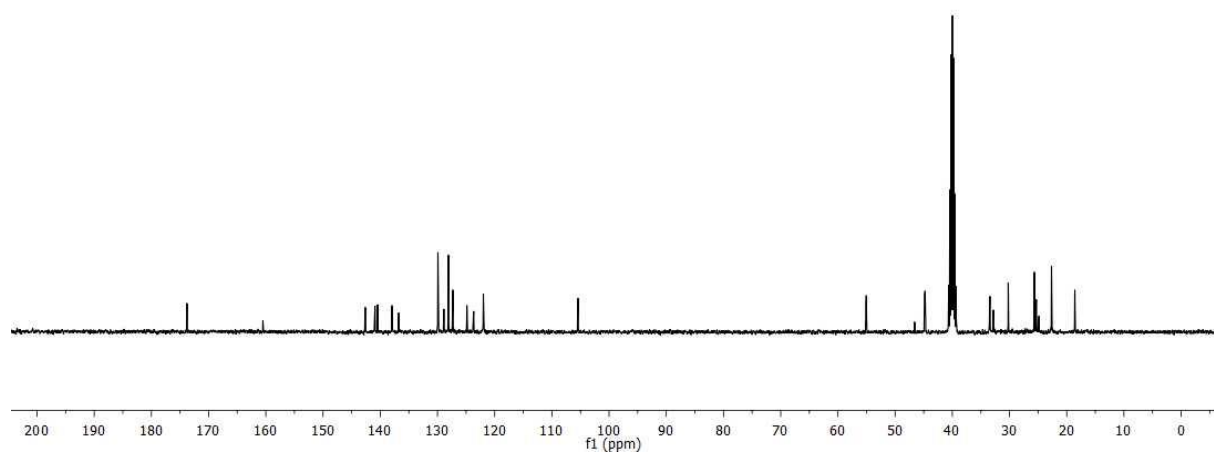

HM-1741  
single\_pulse

8.463  
8.462  
8.445  
8.443  
8.442  
8.311  
7.963  
7.942  
7.751  
7.729  
7.720  
7.587  
7.584  
7.569  
7.566  
7.563  
7.549  
7.485  
7.462  
7.438  
7.435  
7.431  
7.417  
7.414

4.931  
4.895  
4.876  
4.858

2.225  
2.206  
2.192  
2.173  
2.159  
2.141  
1.962  
1.956  
1.938  
1.920  
1.907  
1.889  
1.857  
1.832  
1.816  
1.800  
1.772  
1.701  
1.692  
1.676  
1.662  
1.655

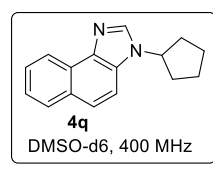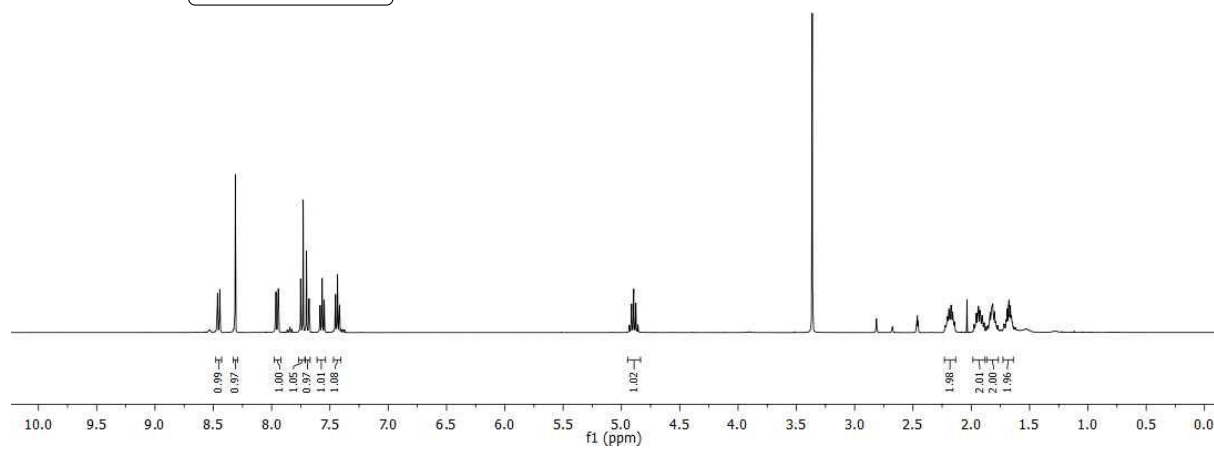

HM-1741  
single pulse decoupled gated NOE

140.194  
139.247  
130.447  
130.165  
128.889  
127.355  
126.707  
124.695  
123.354  
121.655  
112.355

56.034

32.678

24.055

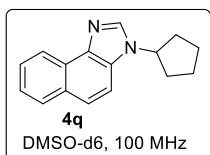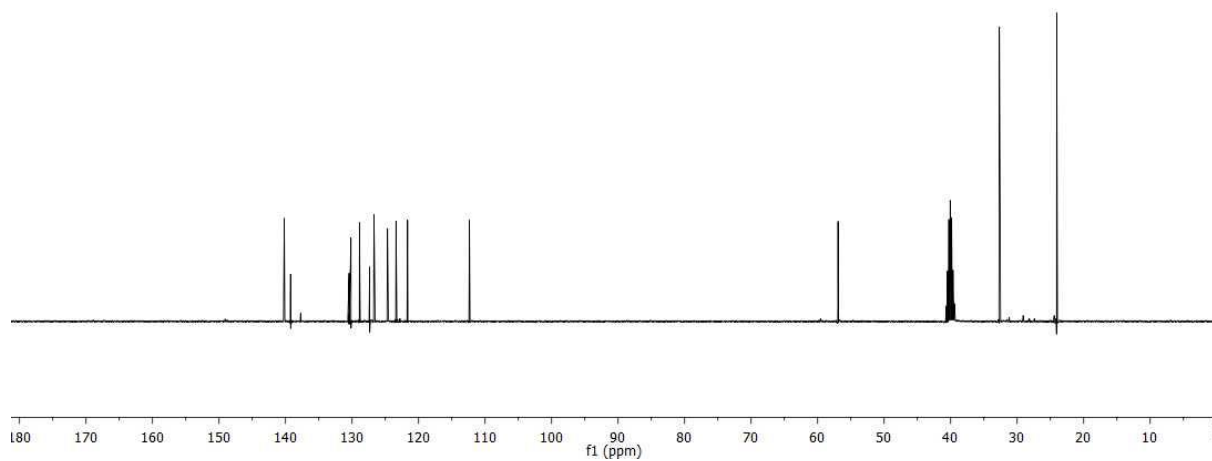

HM-1791  
single\_pulse

8.431  
8.311  
8.212  
7.960  
7.797  
7.774  
7.699  
7.677  
7.573  
7.559  
7.556  
7.553  
7.538  
7.535  
7.498  
7.489  
7.456  
7.412  
7.408

4.661  
4.646  
4.636  
4.611  
4.602  
4.588

2.083  
2.067  
2.057  
2.043  
2.029  
1.793  
1.777  
1.762  
1.738  
1.663  
1.627  
1.605  
1.584

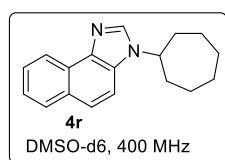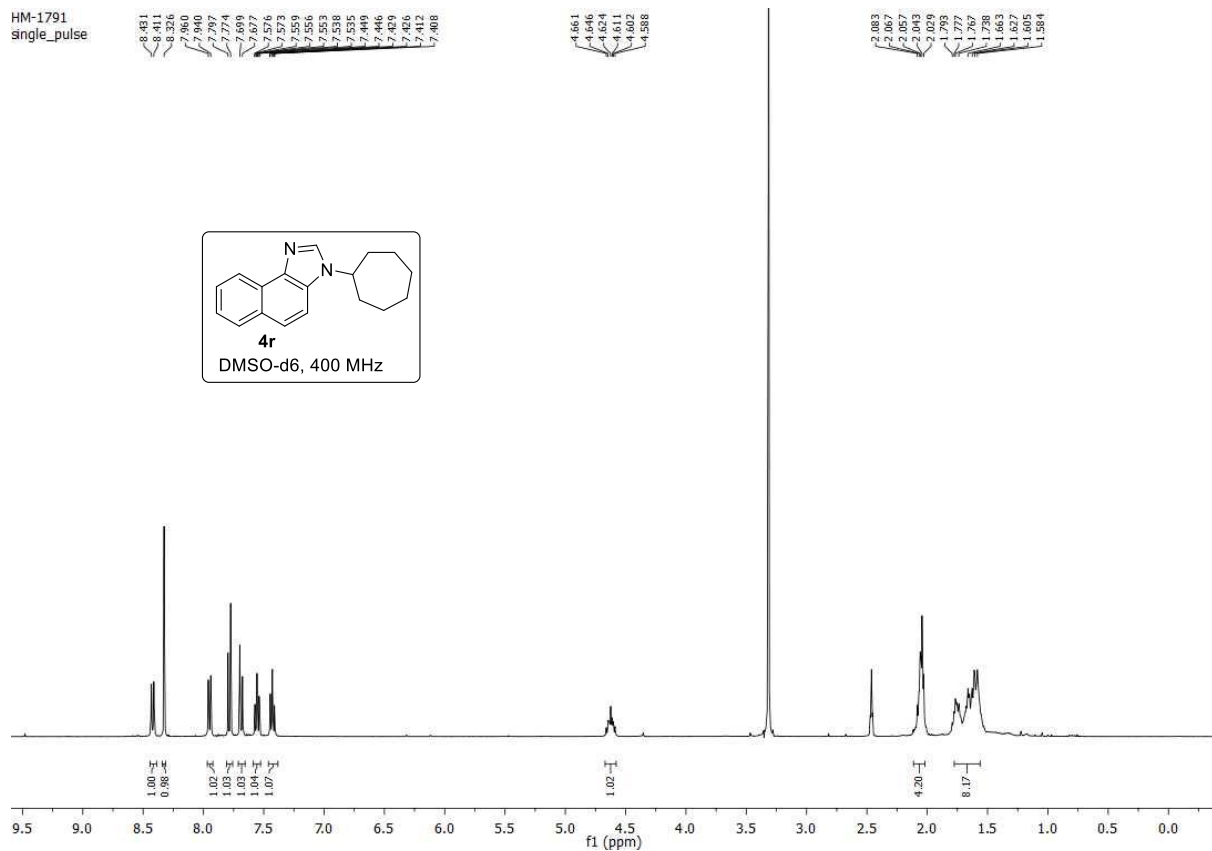

HM-1791  
single pulse decoupled gated NOE

140.203  
138.930  
130.127  
129.746  
128.869  
128.486  
126.461  
124.613  
123.279  
121.615  
112.485

57.466  
35.488  
27.536  
24.725

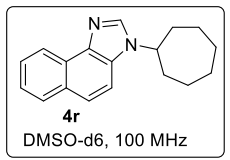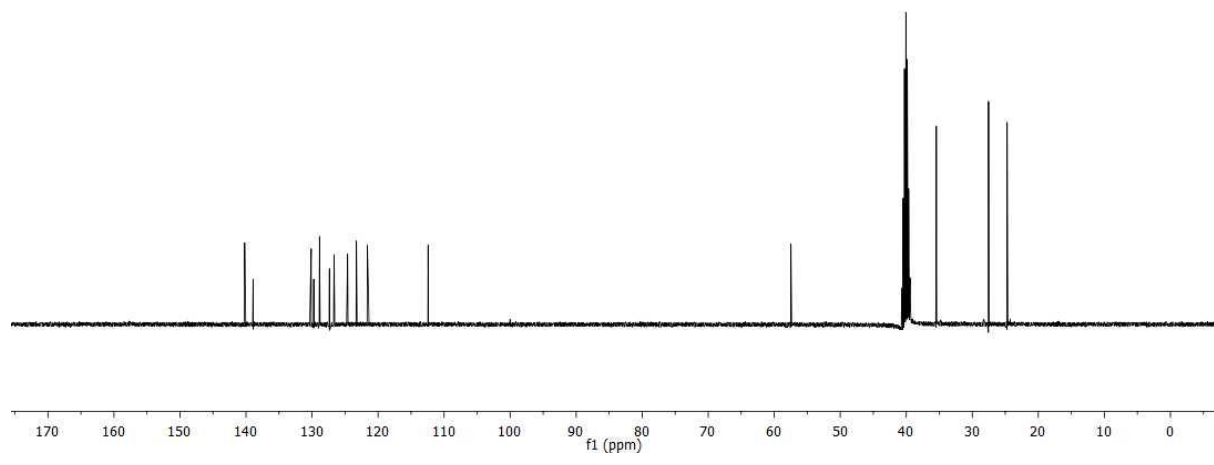

HM-1540  
single\_pulse

8.480  
8.410  
8.392  
7.971  
7.951  
7.891  
7.871  
7.777  
7.705  
7.585  
7.582  
7.567  
7.565  
7.546  
7.544  
7.461  
7.468  
7.443  
7.441  
7.438  
7.433  
7.420

4.717  
4.708  
4.688  
4.678  
4.649  
4.639  
4.143  
4.114

2.953

2.068  
2.037  
1.994  
1.983  
1.963  
1.953  
1.872  
1.891

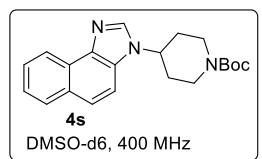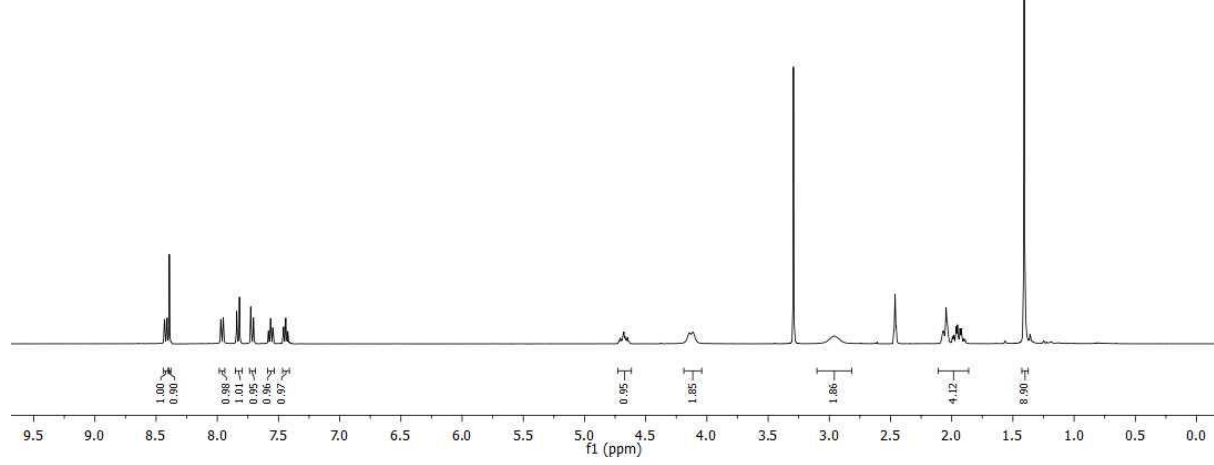

HM-1540  
single pulse decoupled gated NOE

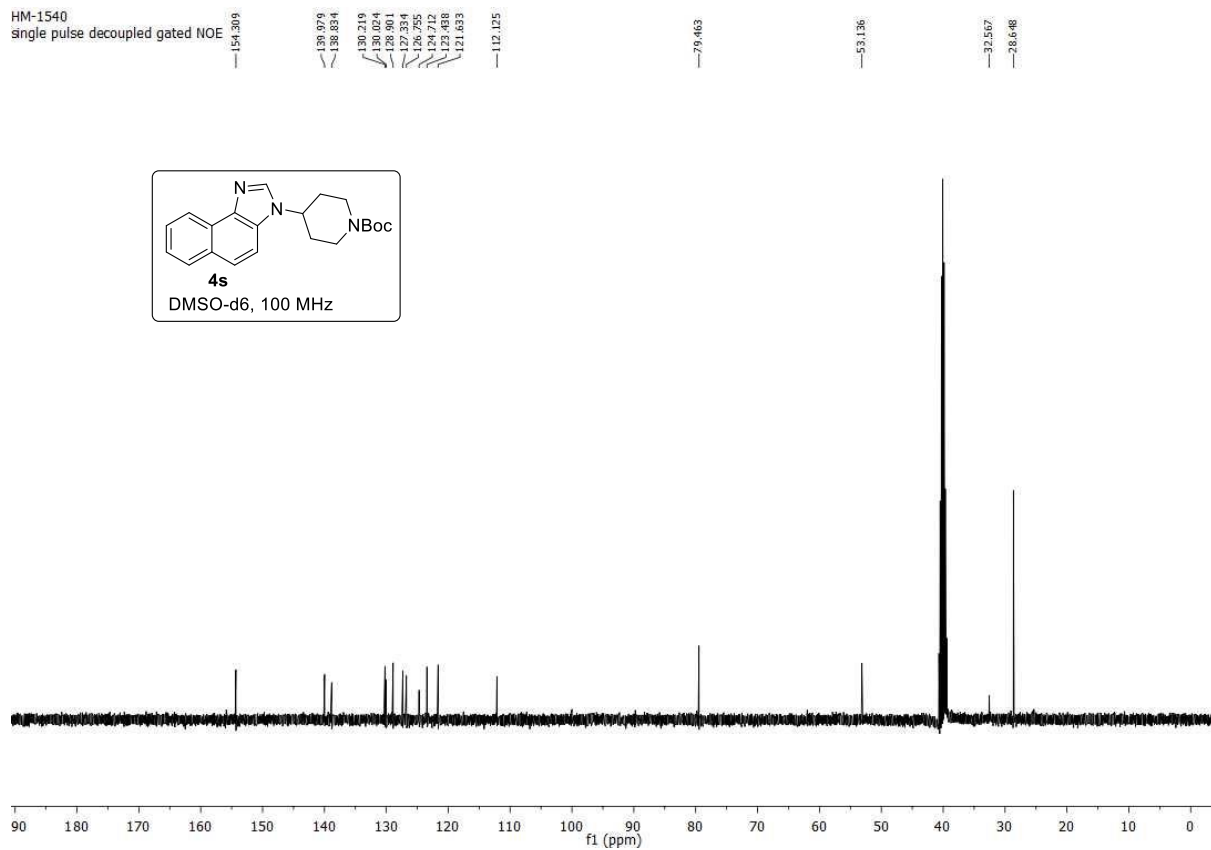

HM-1743  
single\_pulse

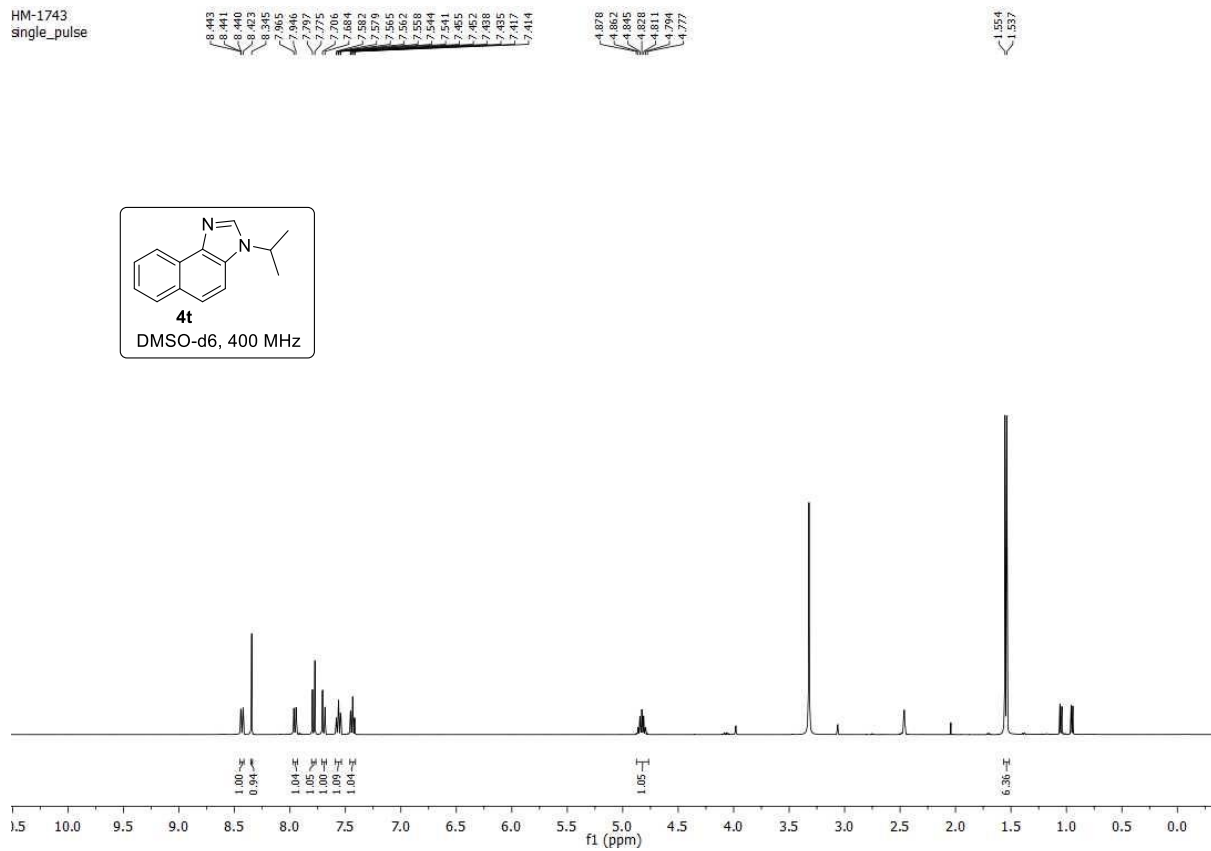



HM-1743  
 single pulse decoupled gated NOE  
 130.857  
 136.106  
 130.132  
 129.888  
 128.882  
 127.367  
 126.689  
 123.388  
 121.637  
 112.303  
 47.847  
 23.095

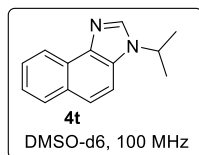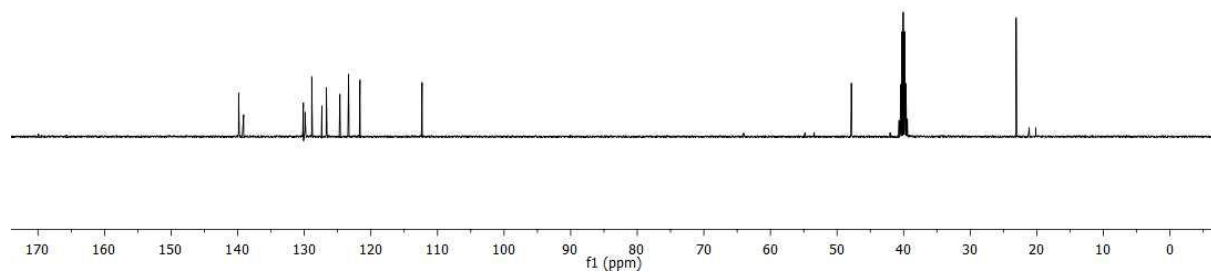

HM-1527  
 single\_pulse

8.437  
 8.435  
 8.433  
 8.416  
 8.414  
 8.413  
 8.244  
 7.964  
 7.944  
 7.764  
 7.742  
 7.709  
 7.686  
 7.594  
 7.581  
 7.566  
 7.563  
 7.560  
 7.546  
 7.544  
 7.454  
 7.450  
 7.436  
 7.433  
 7.430  
 7.416  
 7.413  
 4.321  
 4.303  
 4.286  
 1.806  
 1.788  
 1.789  
 1.772  
 1.752  
 1.270  
 1.252  
 1.233  
 1.214  
 1.195  
 0.863  
 0.845  
 0.826

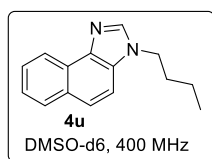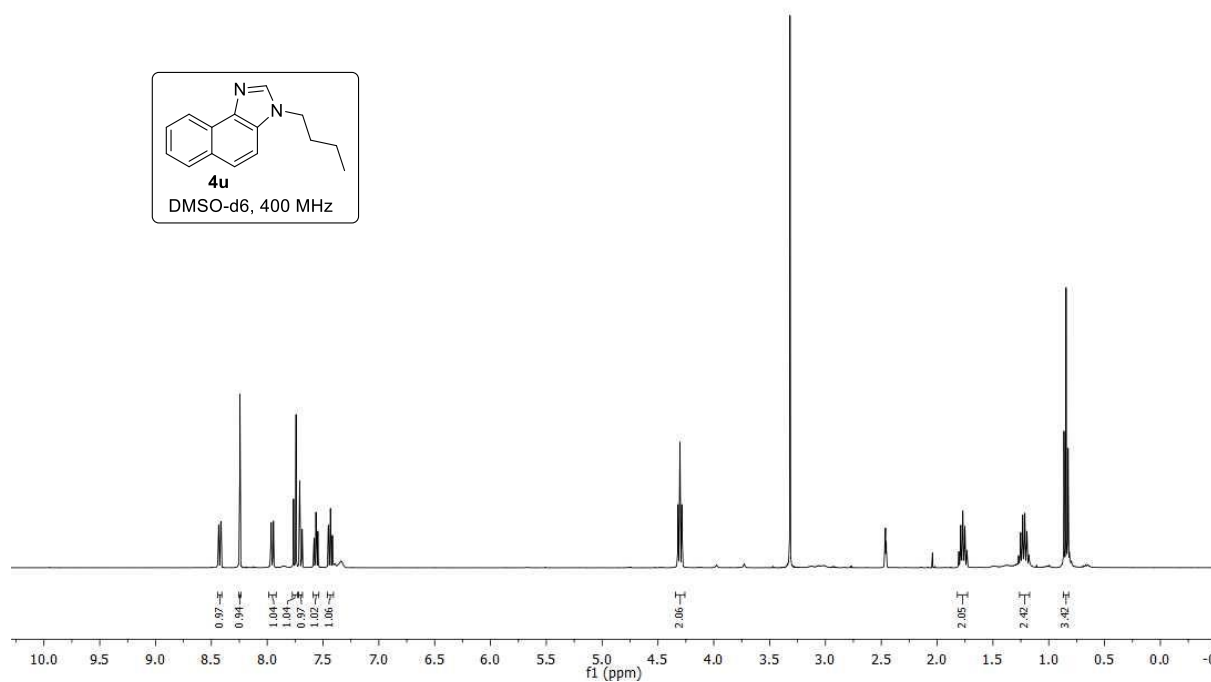

HM-1527  
single pulse decoupled gated NOE

142.392  
138.961  
130.553  
130.108  
129.932  
127.379  
126.711  
124.622  
123.493  
121.640  
111.997

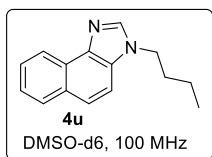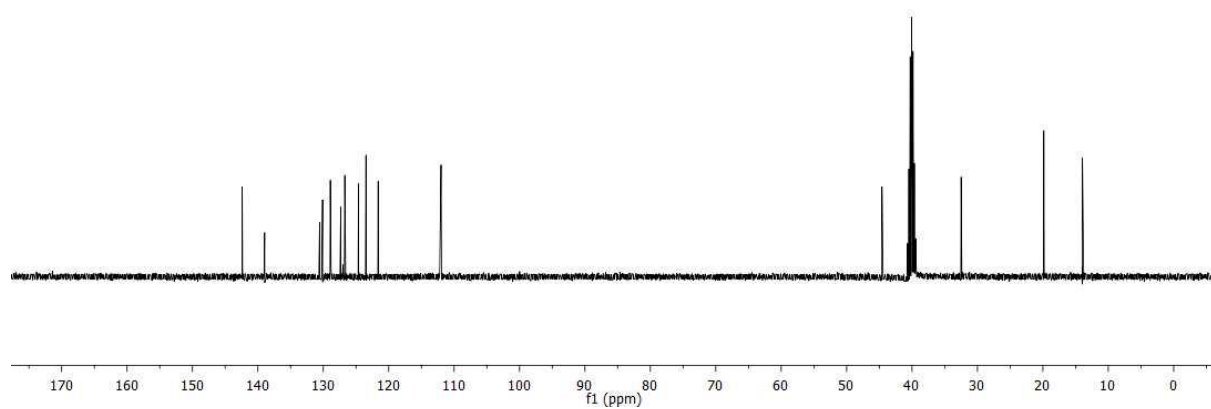

HM-1745  
single\_pulse

8.443  
8.442  
8.440  
8.438  
8.421  
8.418  
8.417  
8.220  
7.963  
7.943  
7.750  
7.705  
7.683  
7.587  
7.584  
7.570  
7.467  
7.553  
7.549  
7.546  
7.455  
7.452  
7.448  
7.435  
7.418  
7.414  
4.133  
4.115  
2.178  
2.164  
2.147  
2.130  
2.113  
2.096  
2.079  
0.841  
0.824

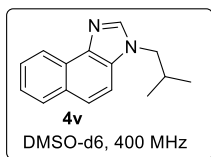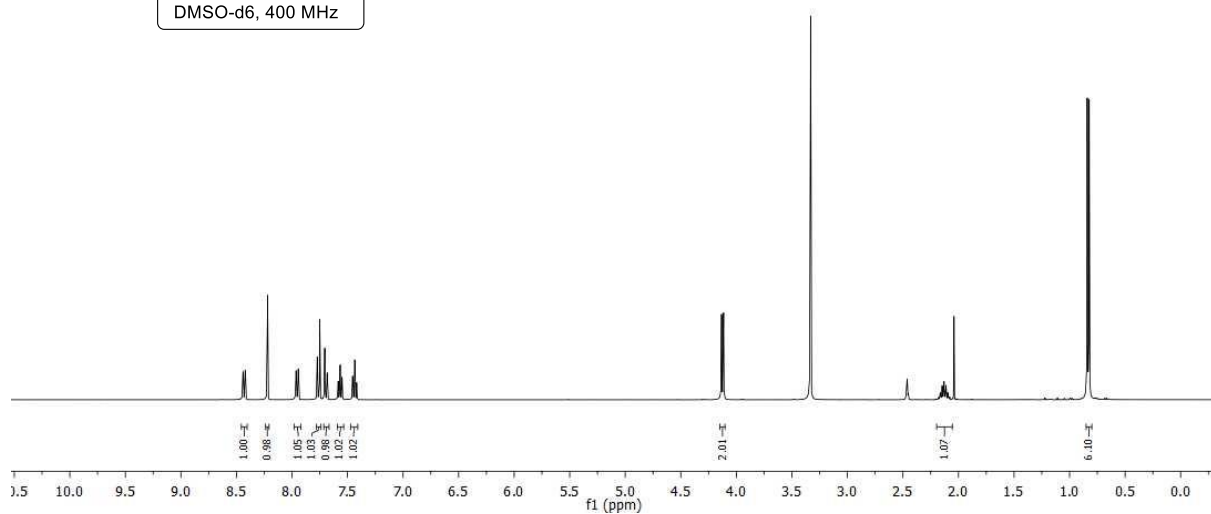

HM-1745  
 single pulse decoupled gated NOE

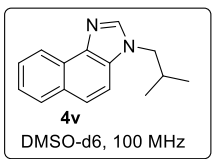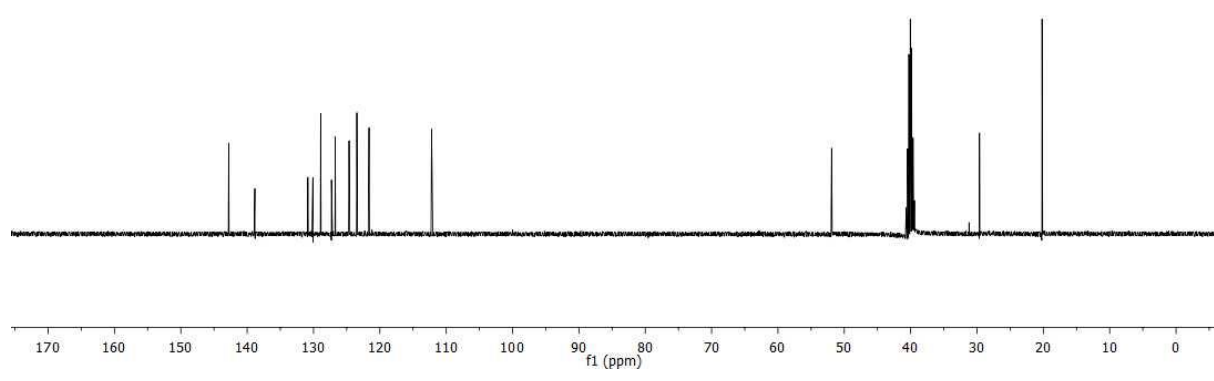

HM-1749  
 single\_pulse

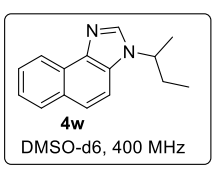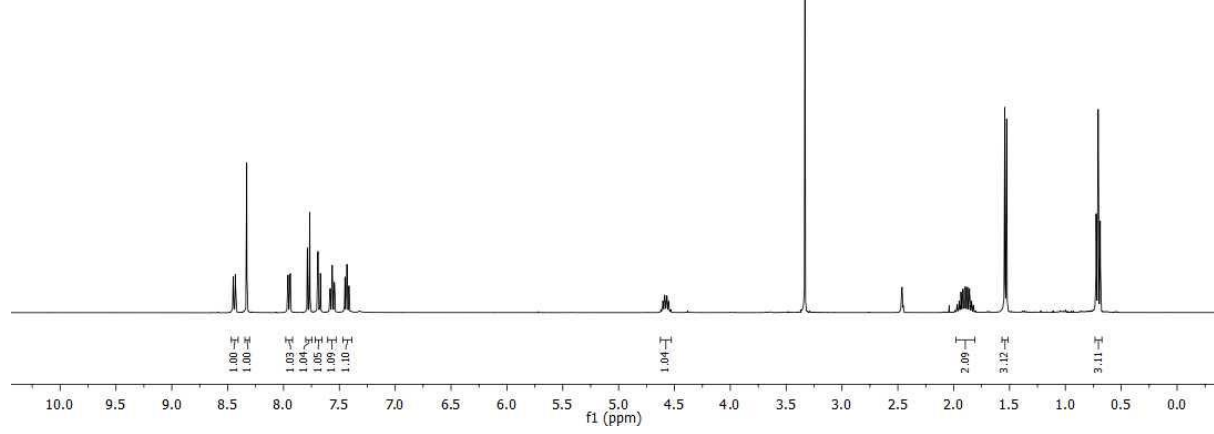

HM-1749  
single pulse decoupled gated NOE

140.511  
139.010  
130.211  
130.125  
128.867  
127.386  
126.861  
124.631  
123.323  
121.638  
112.407

53.586

29.780

21.164

11.002

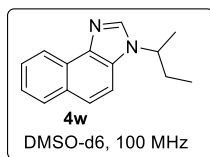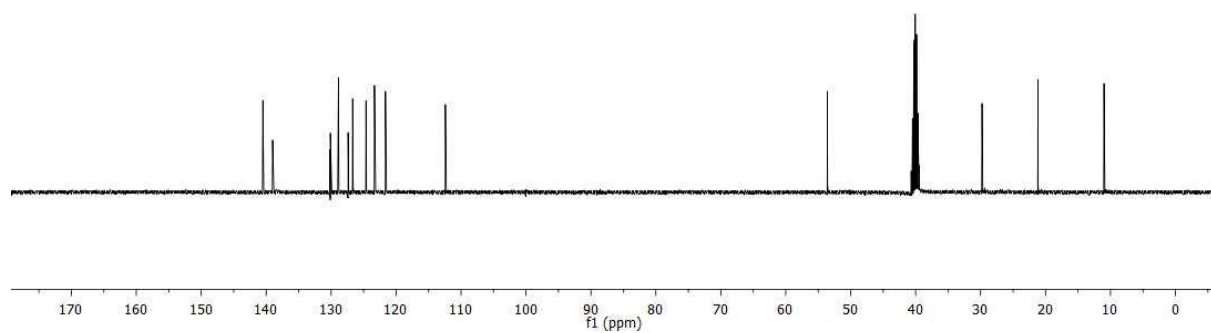

HM-1530  
single\_pulse

8.462  
8.461  
8.459  
8.442  
8.440  
8.439  
8.437  
8.248  
7.980  
7.957  
7.677  
7.654  
7.578  
7.575  
7.561  
7.558  
7.556  
7.540  
7.537  
7.462  
7.459  
7.445  
7.442  
7.431  
7.425  
7.422

1.722

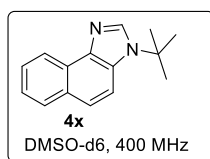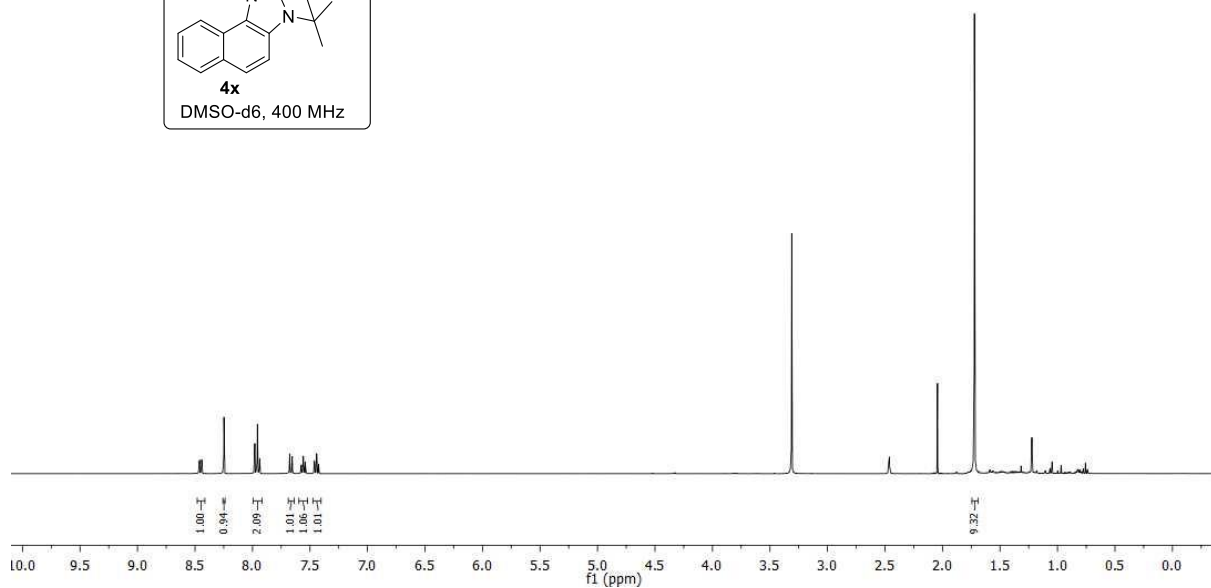

HM-1530  
single pulse decoupled gated NOE

140.466  
139.966  
129.631  
129.616  
129.610  
127.434  
126.616  
124.843  
122.899  
121.788  
—114.738

—56.776

—29.800

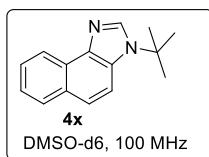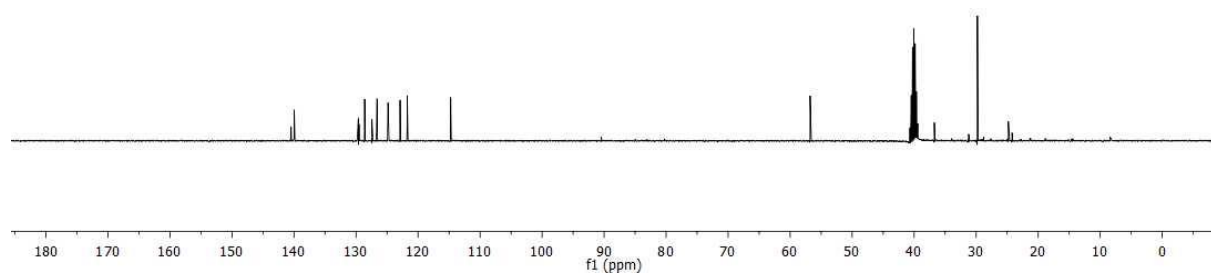

HM-1732  
single\_pulse

8.577  
8.456  
8.454  
8.452  
8.435  
8.433  
8.432  
7.921  
7.900  
7.876  
7.874  
7.580  
7.568  
7.565  
7.558  
7.548  
7.545  
7.476  
7.452  
7.423  
7.409  
7.405  
7.298  
7.291  
7.282  
7.272  
7.236  
7.229  
7.223  
7.214  
7.206  
5.986  
5.984  
5.931  
5.913

1.979  
1.961

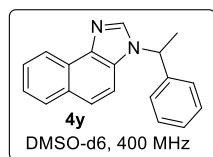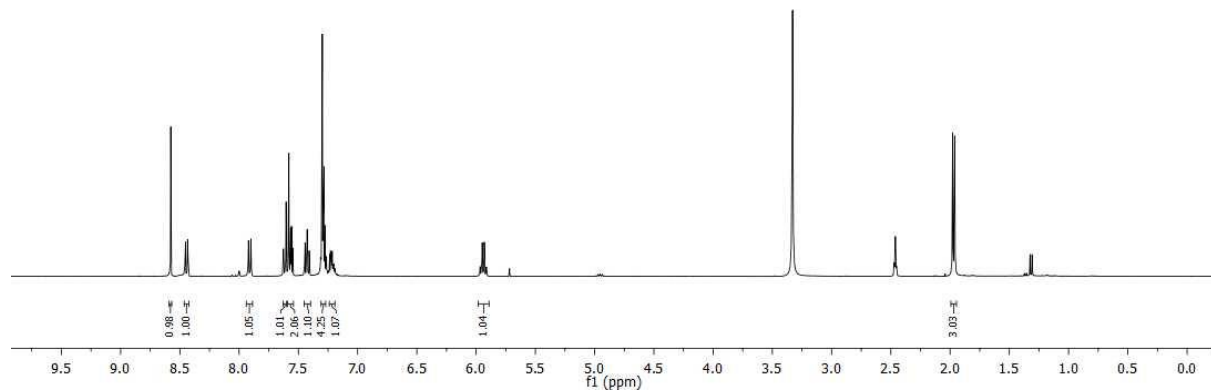

HM-1732  
single pulse decoupled gated NOE

142.425  
140.464  
139.944  
139.247  
130.161  
129.251  
128.872  
128.211  
127.288  
126.553  
124.791  
123.512  
121.649  
— 112.464

—55.010

—21.717

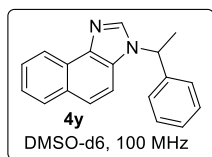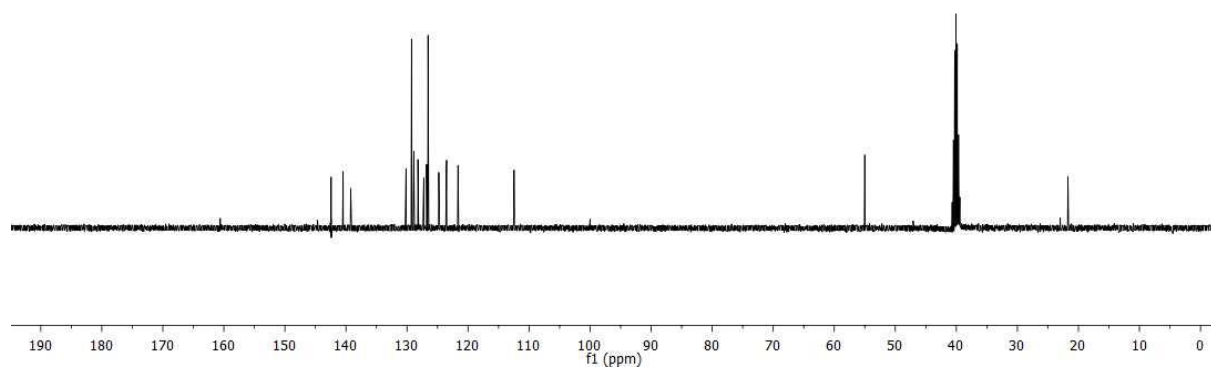

HM-1541  
single\_pulse

8.067  
8.046  
8.046  
8.046  
8.112  
7.974  
7.961  
7.923  
7.915  
7.915  
7.893  
7.873  
7.833  
7.812  
7.656  
7.653  
7.653  
7.656  
7.653  
7.618  
7.615  
7.582  
7.560  
7.550  
7.550  
7.514  
7.506  
7.498  
7.480  
7.463  
7.460  
7.460  
7.367  
7.348  
7.283  
7.279  
7.261  
7.256  
7.191  
7.191  
6.463  
6.467  
6.449  
6.432

2.160  
2.142

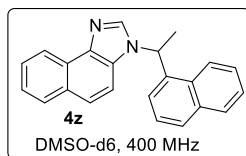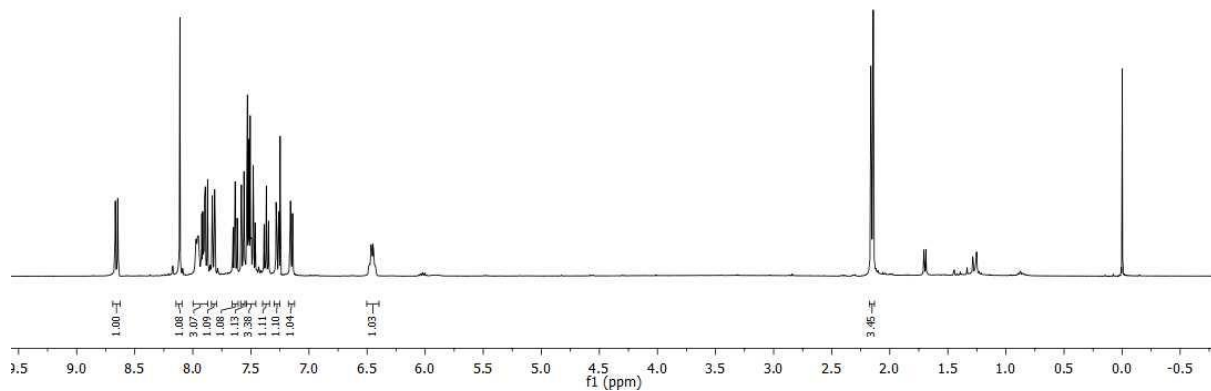

HM-1541  
single pulse decoupled gated NOE

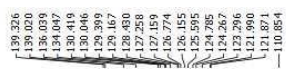

51.919

21.405

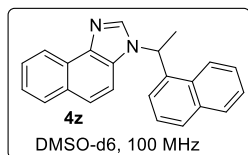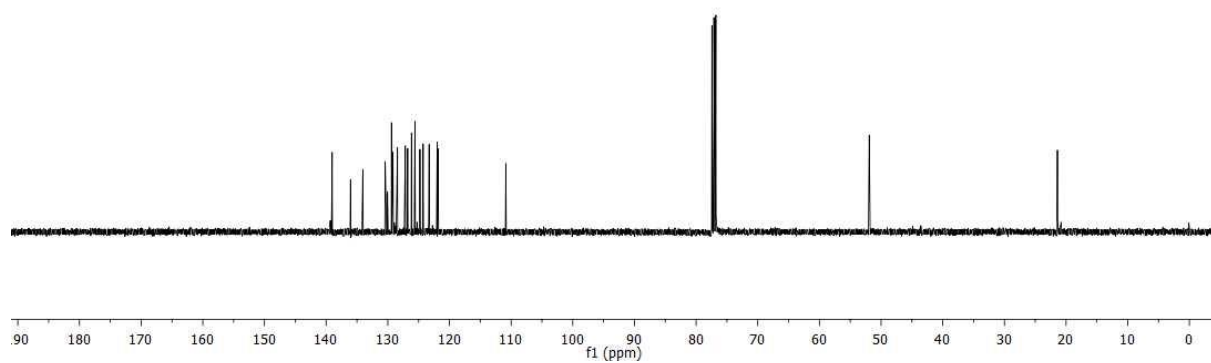

HM-1812  
single\_pulse

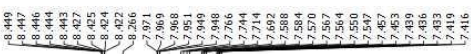

4.365  
4.347  
4.329  
4.311

1.485  
1.416  
1.398

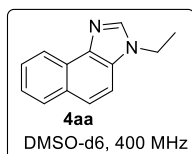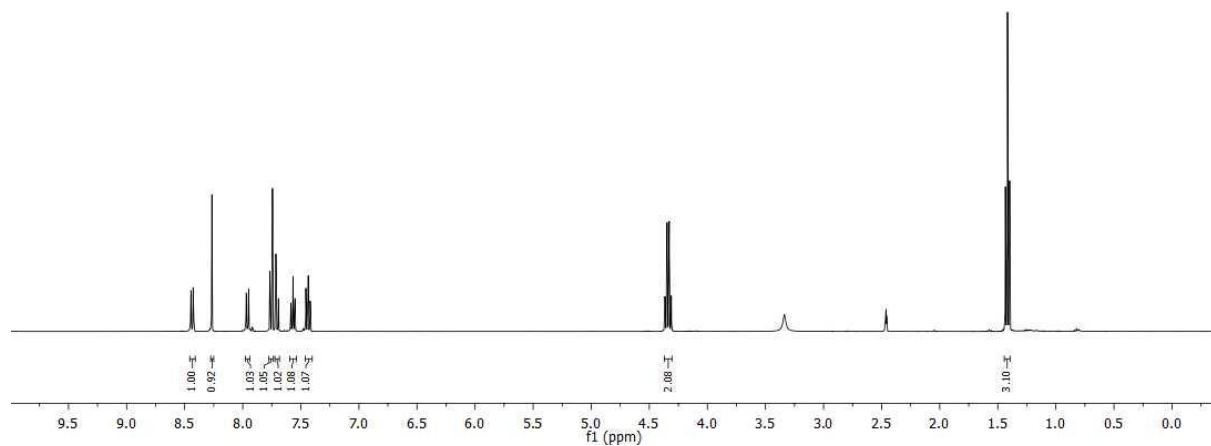

HM-1812  
single pulse decoupled gated NOE

141.861  
139.055  
130.310  
130.127  
128.939  
127.350  
126.710  
124.625  
123.403  
121.623  
111.902

39.017

16.265

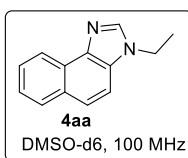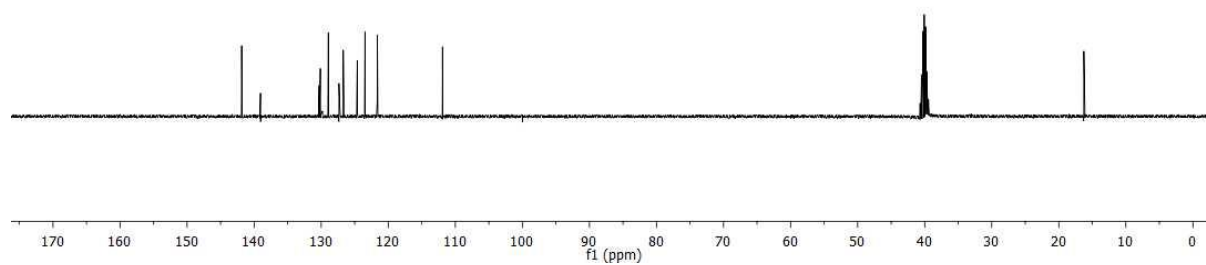

HM-1805  
single\_pulse

8.456  
8.454  
8.453  
8.451  
8.434  
8.432  
8.244  
7.967  
7.947  
7.717  
7.697  
7.684  
7.597  
7.594  
7.580  
7.577  
7.573  
7.556  
7.464  
7.461  
7.447  
7.444  
7.440  
7.426  
7.423  
6.102  
6.088  
6.075  
6.062  
6.046  
6.030  
6.014  
5.199  
5.196  
5.192  
5.189  
5.174  
5.170  
5.167  
5.153  
5.092  
5.088  
5.084  
5.080  
5.049  
5.046  
5.042  
5.038  
4.998  
4.994  
4.990  
4.984  
4.980  
4.976

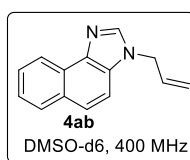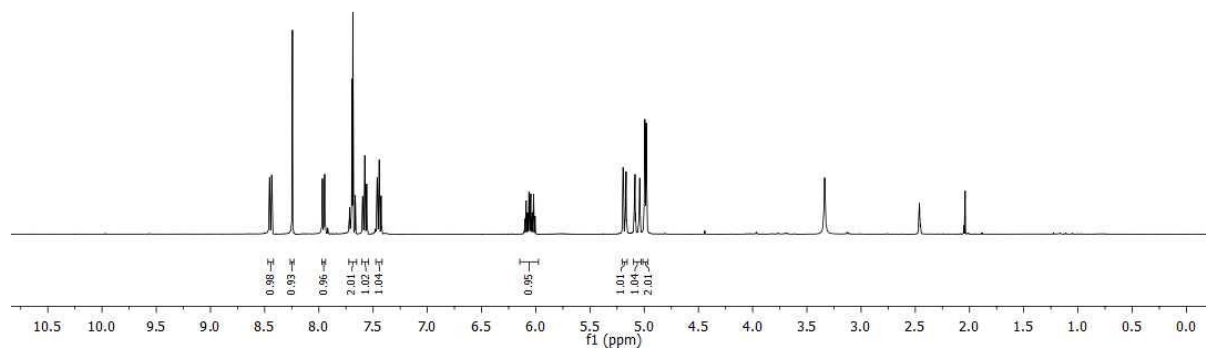



HM-1805  
single pulse decoupled gated NOE

142.404  
139.034  
134.319  
130.583  
130.170  
128.953  
127.303  
126.772  
123.602  
121.637  
117.960  
112.141

47.278

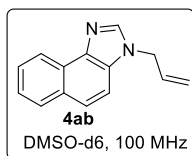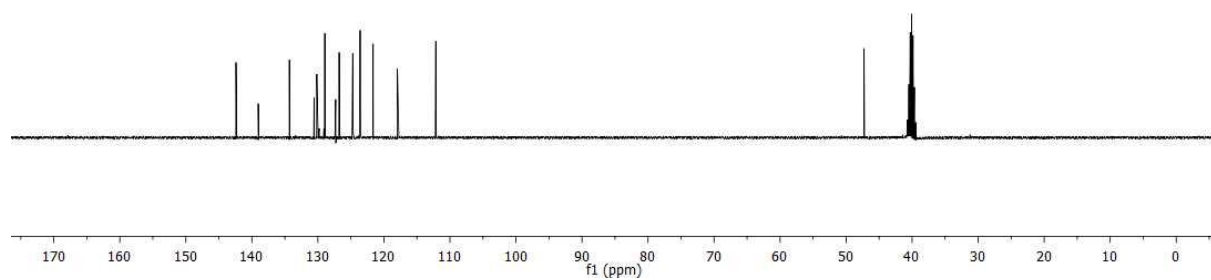

KKP-299  
single\_pulse

8.441  
7.945  
7.924  
7.667  
7.597  
7.594  
7.579  
7.576  
7.573  
7.559  
7.556  
7.457  
7.454  
7.440  
7.437  
7.434  
7.420  
7.417  
7.296  
7.290  
7.282  
7.244  
7.224  
7.204  
5.585

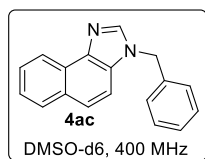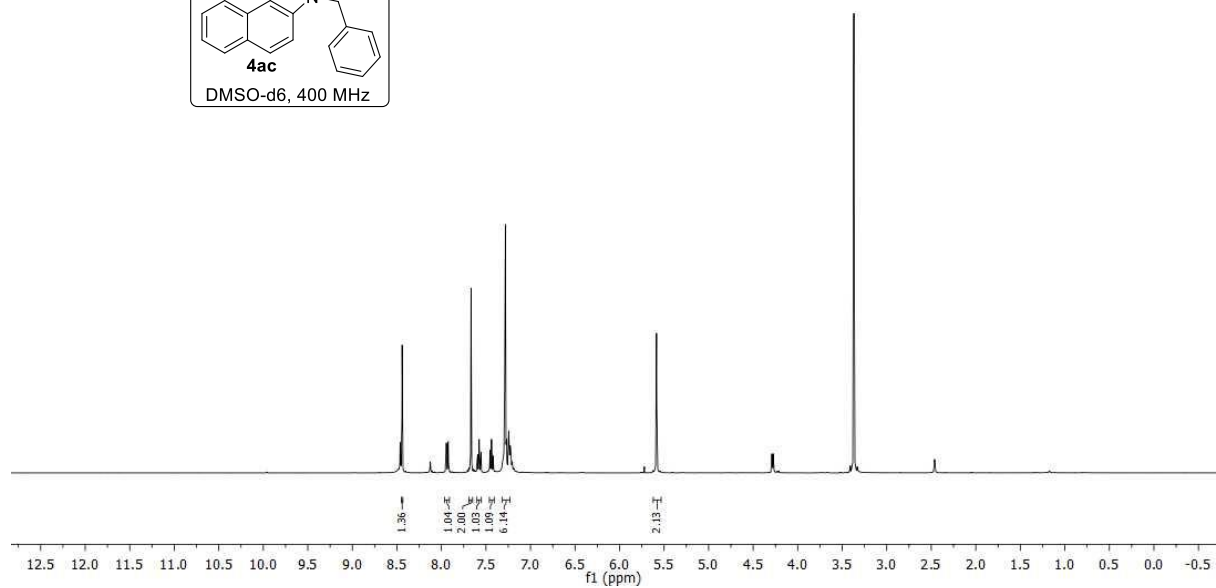

HM-1804  
single pulse decoupled gated NOE

142.686  
137.688  
137.488  
130.486  
130.152  
129.257  
128.936  
128.278  
127.273  
126.881  
124.775  
123.714  
121.620  
112.152

48.380

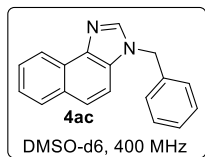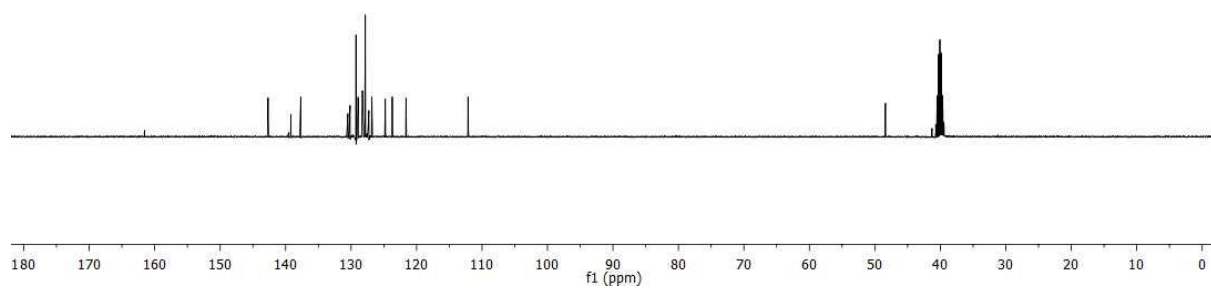

HM-1811  
single\_pulse

8.445  
8.442  
8.435  
8.423  
7.941  
7.921  
7.718  
7.694  
7.651  
7.570  
7.566  
7.563  
7.549  
7.546  
7.488  
7.484  
7.431  
7.428  
7.414  
7.410  
7.397  
7.392  
7.291  
7.285  
7.280  
7.226  
7.216  
7.211  
7.204  
7.200  
7.194  
5.534

1.167

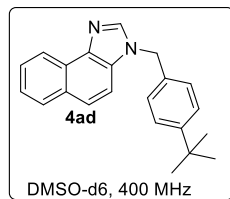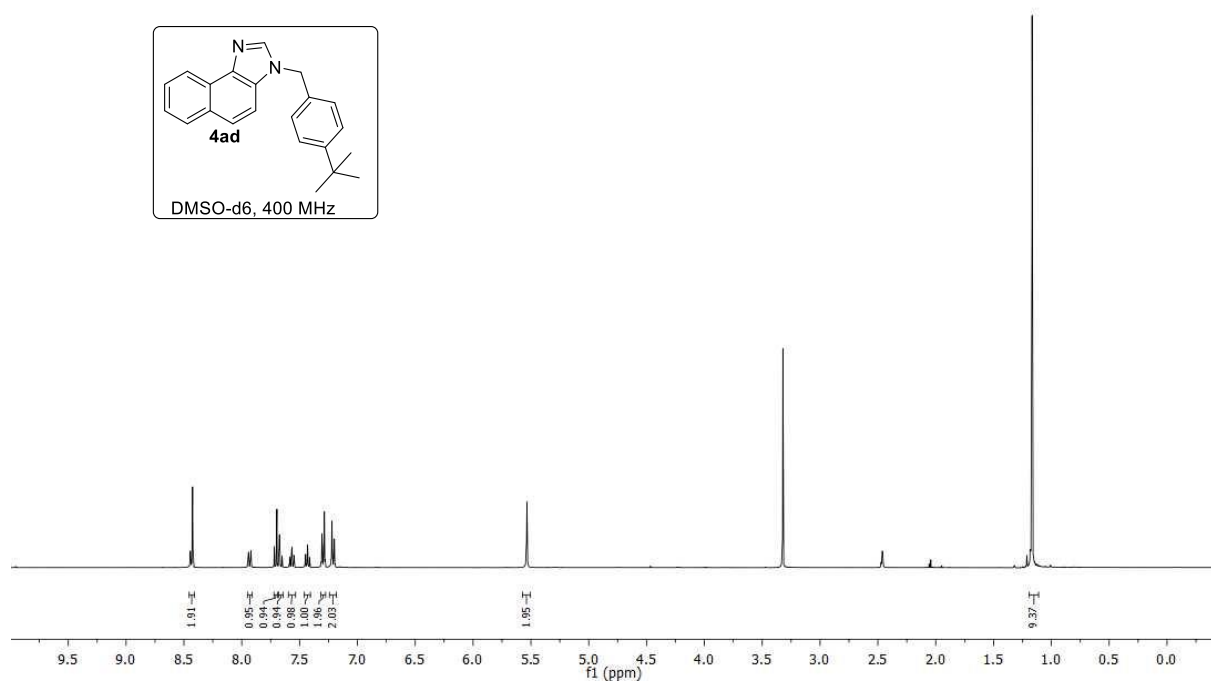

HM-1811  
single pulse decoupled gated NOE

150.703  
142.623  
138.190  
134.756  
130.176  
128.921  
127.581  
126.804  
125.987  
124.747  
123.691  
121.610  
112.189

48.028

34.735  
31.560

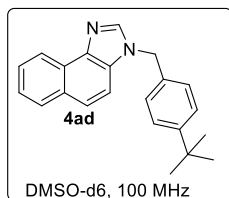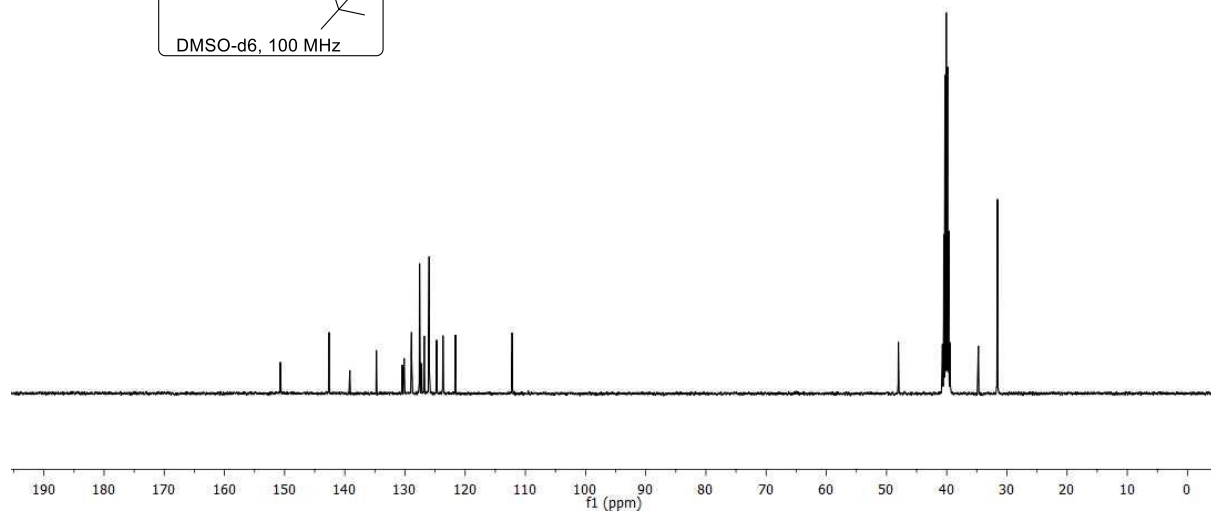

HM-1809  
single\_pulse

8.465  
8.464  
8.462  
8.442  
8.443  
8.442  
8.419  
8.419  
7.940  
7.920  
7.704  
7.682  
7.682  
7.646  
7.589  
7.586  
7.572  
7.569  
7.566  
7.558  
7.549  
7.446  
7.432  
7.426  
7.412  
7.412  
7.285  
7.277  
7.255  
7.248  
4.866  
4.858  
4.842  
4.832  
4.836  
4.829  
5.490

3.619

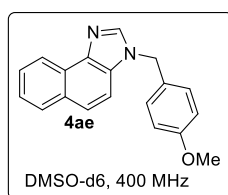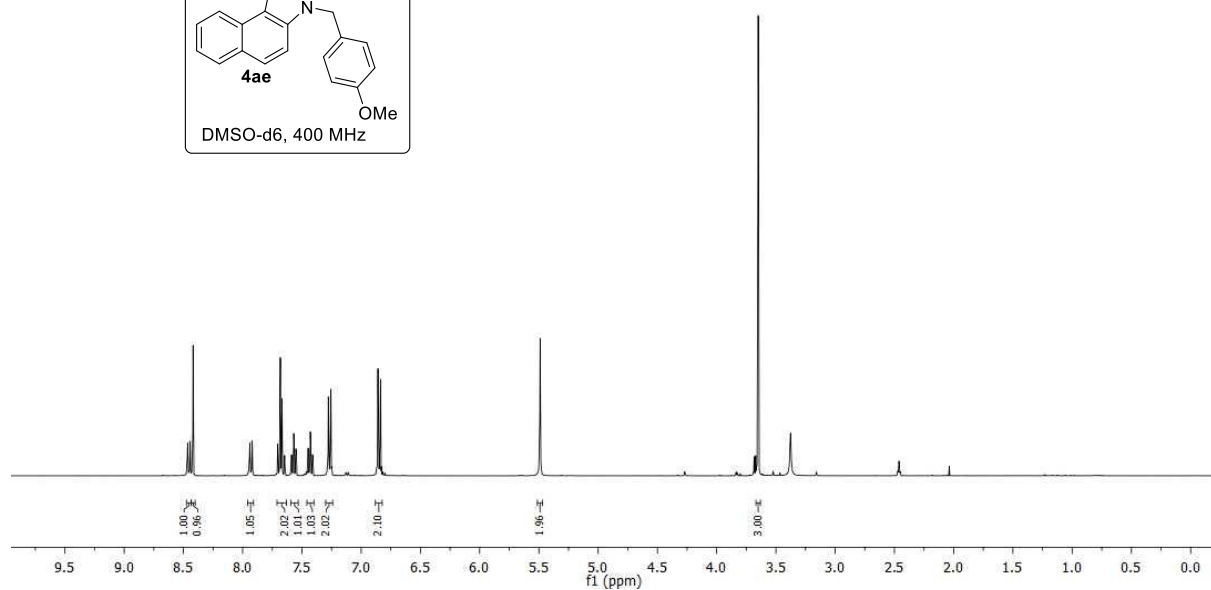

HM-1809  
single pulse decoupled gated DE

156.699  
142.510  
139.275  
130.410  
130.138  
129.542  
128.927  
127.200  
126.476  
124.748  
123.630  
121.631  
114.613  
112.217

55.581  
47.943

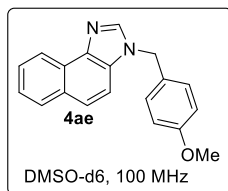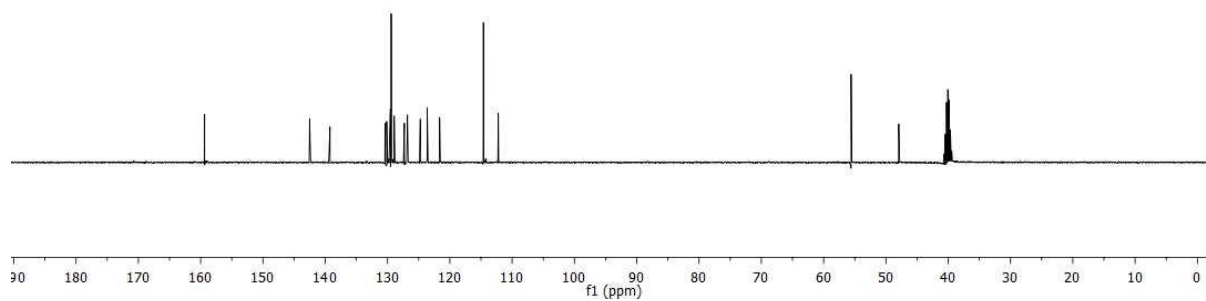

HM-1808  
single\_pulse

8.431  
8.413  
8.412  
8.410  
8.408  
8.406  
8.395  
7.707  
7.685  
7.677  
7.655  
7.591  
7.588  
7.575  
7.570  
7.567  
7.553  
7.550  
7.468  
7.445  
7.441  
7.437  
7.434  
7.420  
7.417  
7.379  
7.365  
7.366  
7.368  
7.163  
7.155  
7.133  
7.127  
7.116  
7.110  
5.576

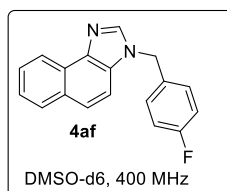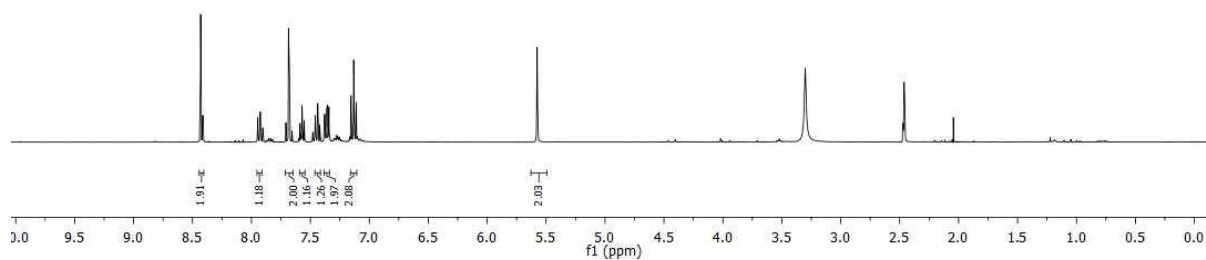

HM-1808  
single pulse decoupled gated NOE

163.370  
160.945  
140.595  
139.184  
133.913  
130.351  
130.152  
130.113  
130.031  
129.788  
129.088  
128.931  
127.247  
126.846  
124.789  
124.666  
121.600  
116.181  
115.968  
112.106

47.621

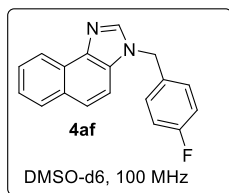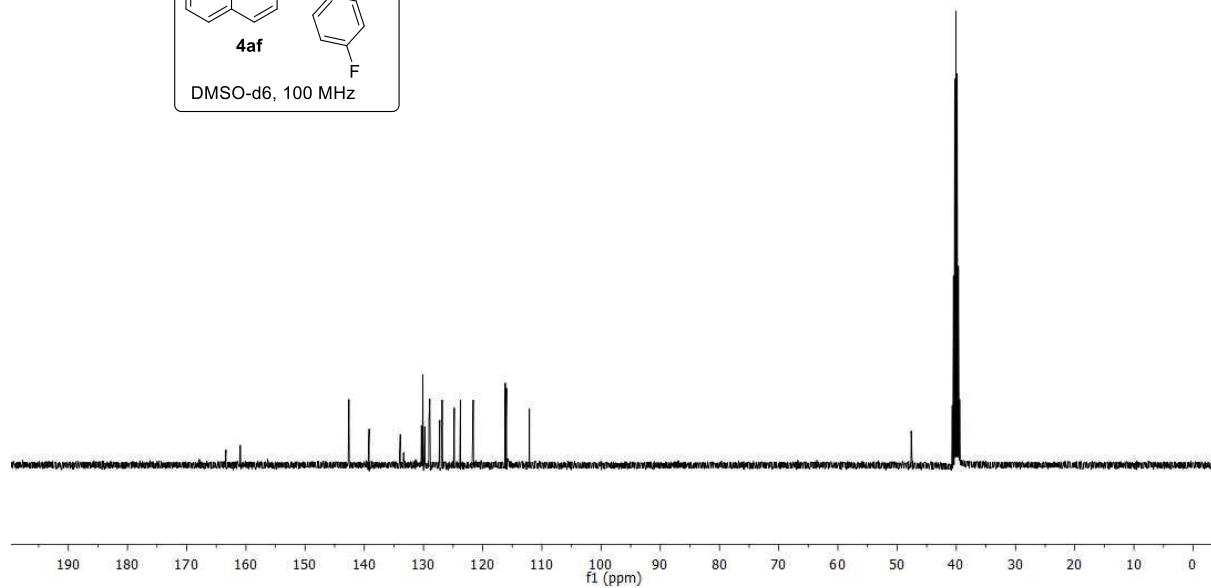

HM-1806  
single\_pulse

8.444  
8.442  
8.441  
8.423  
8.422  
8.421  
8.335  
7.962  
7.942  
7.809  
7.787  
7.721  
7.699  
7.591  
7.577  
7.574  
7.570  
7.568  
7.566  
7.563  
7.557  
7.553  
7.461  
7.447  
7.444  
7.440  
7.426  
7.423  
6.556  
6.542  
6.546  
6.537  
6.392  
6.389  
6.384  
5.619

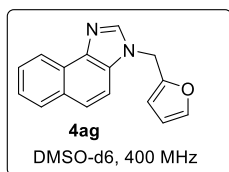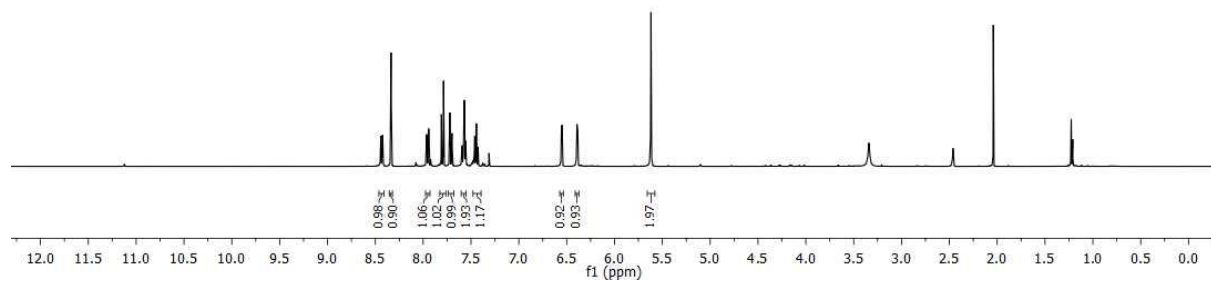

HM-1806  
 single pulse decoupled gated NOE

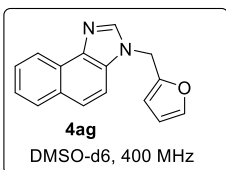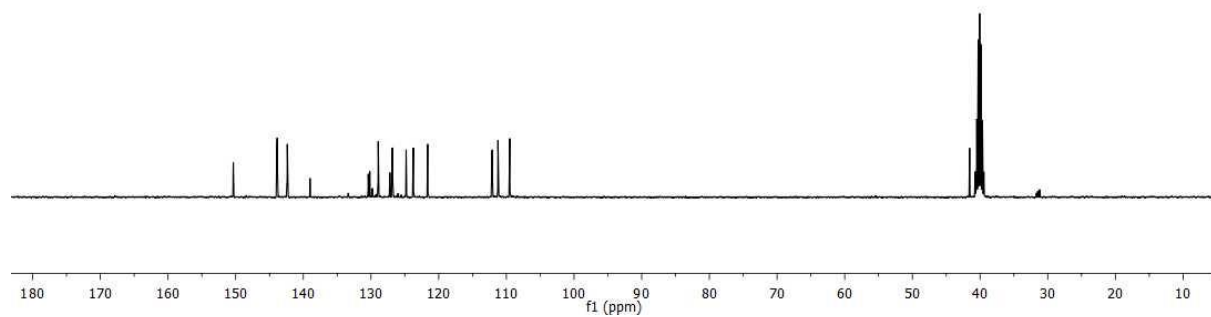

HM-1770  
 single\_pulse

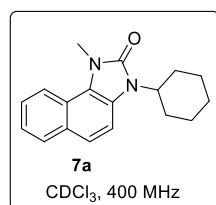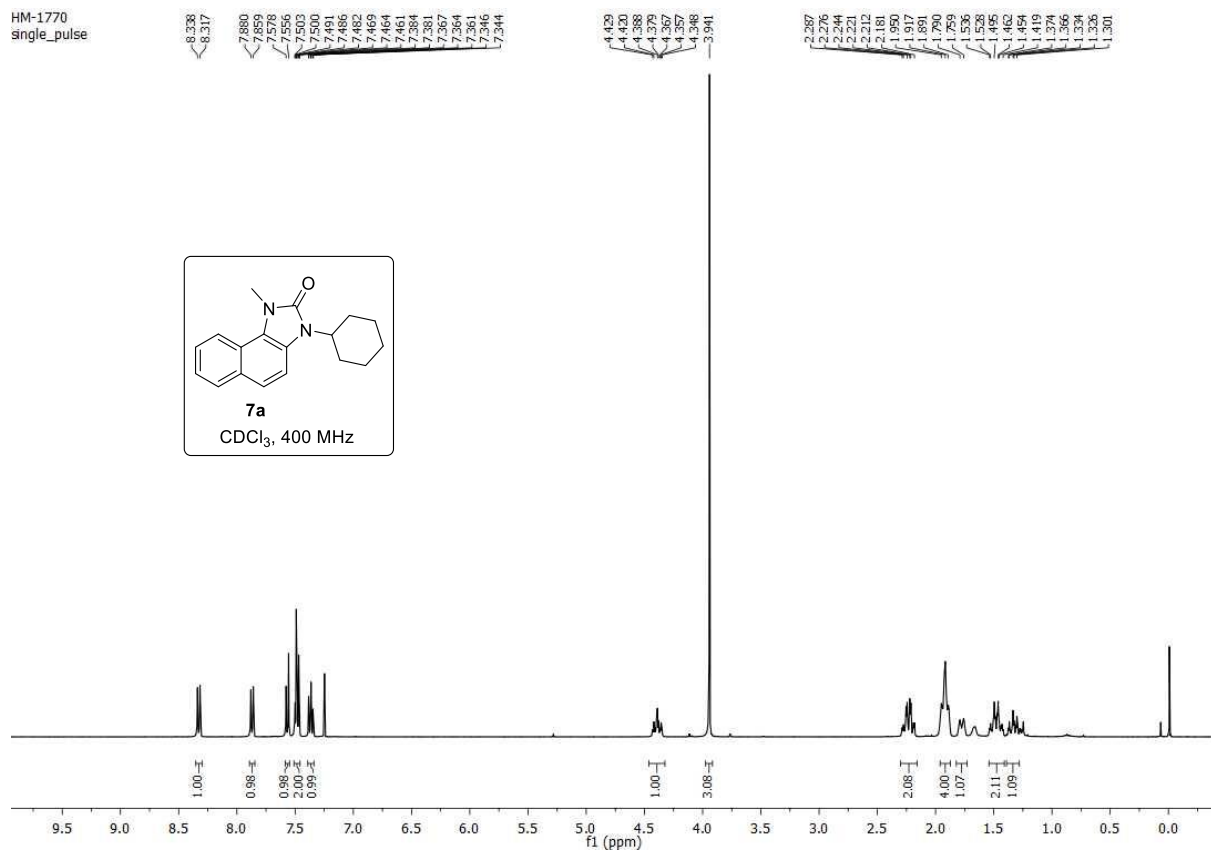

HM-1770  
single pulse decoupled gated NOE

154.139

128.647  
128.339  
128.154  
123.654  
123.430  
122.915  
121.564  
120.891  
120.151

53.571

31.030  
30.614  
26.179  
25.514

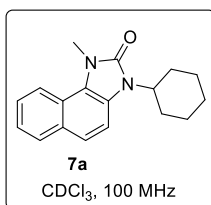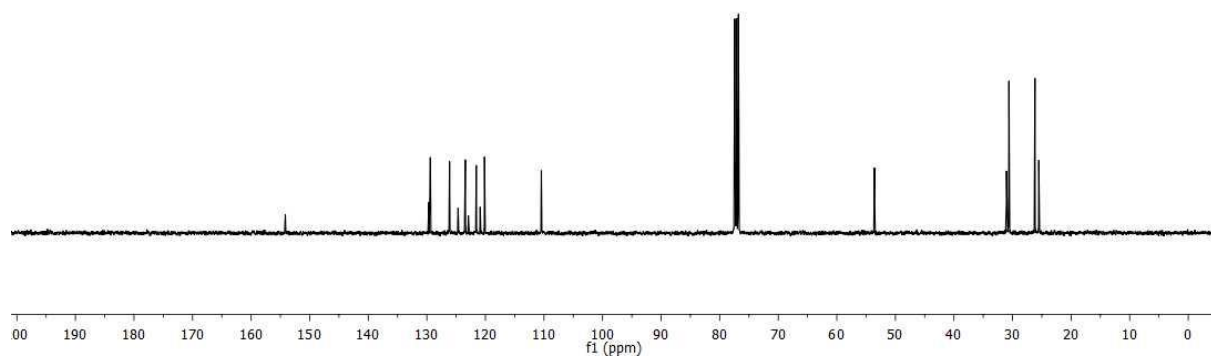

HM-1768  
single\_pulse

8.641  
8.539  
8.538  
8.530  
8.519  
8.517  
8.870  
7.850  
7.848  
7.659  
7.575  
7.559  
7.556  
7.553  
7.542  
7.539  
7.535  
7.511  
7.510  
7.438  
7.425  
7.411  
7.408  
7.391  
7.387

4.355  
4.350  
4.315  
4.284  
4.275

3.669  
3.657  
3.644  
3.240  
3.227  
3.214  
2.309  
2.283  
2.276  
2.252  
2.241  
2.211  
2.068  
1.975  
1.940  
1.907  
1.849  
1.819  
1.494  
1.462  
1.446  
1.441  
1.397  
1.372

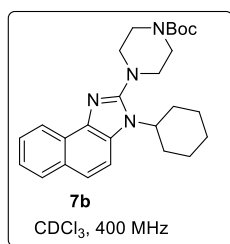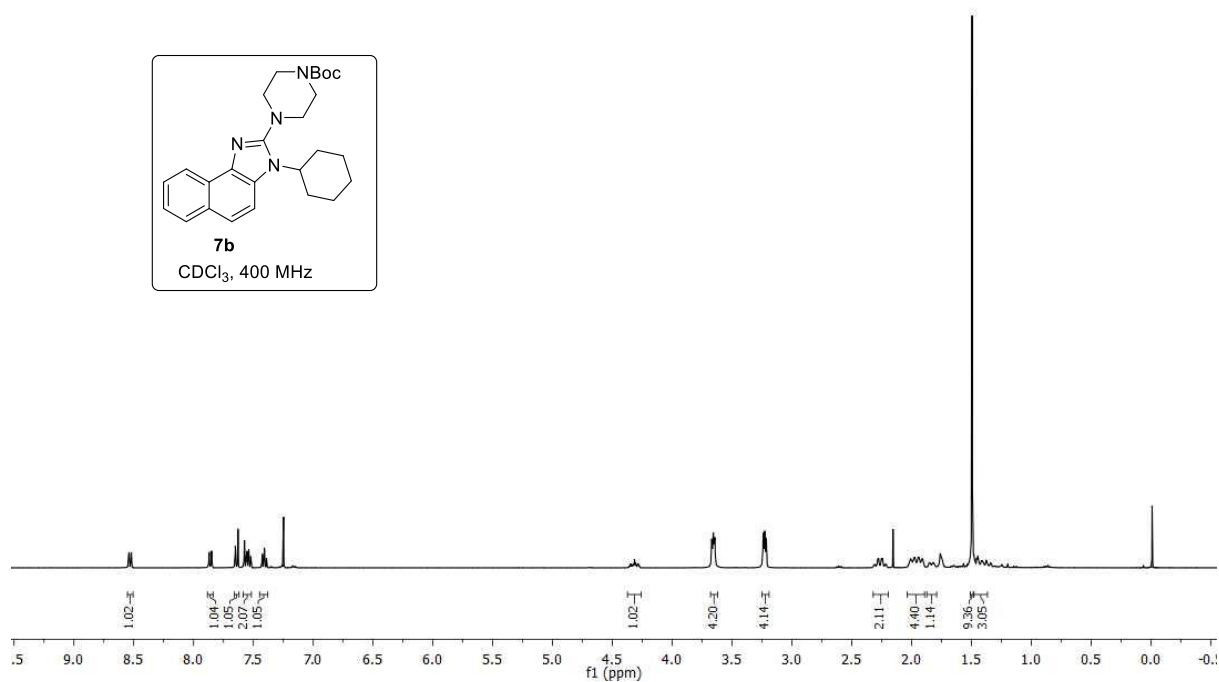

HM-1768  
single pulse decoupled gated NOE

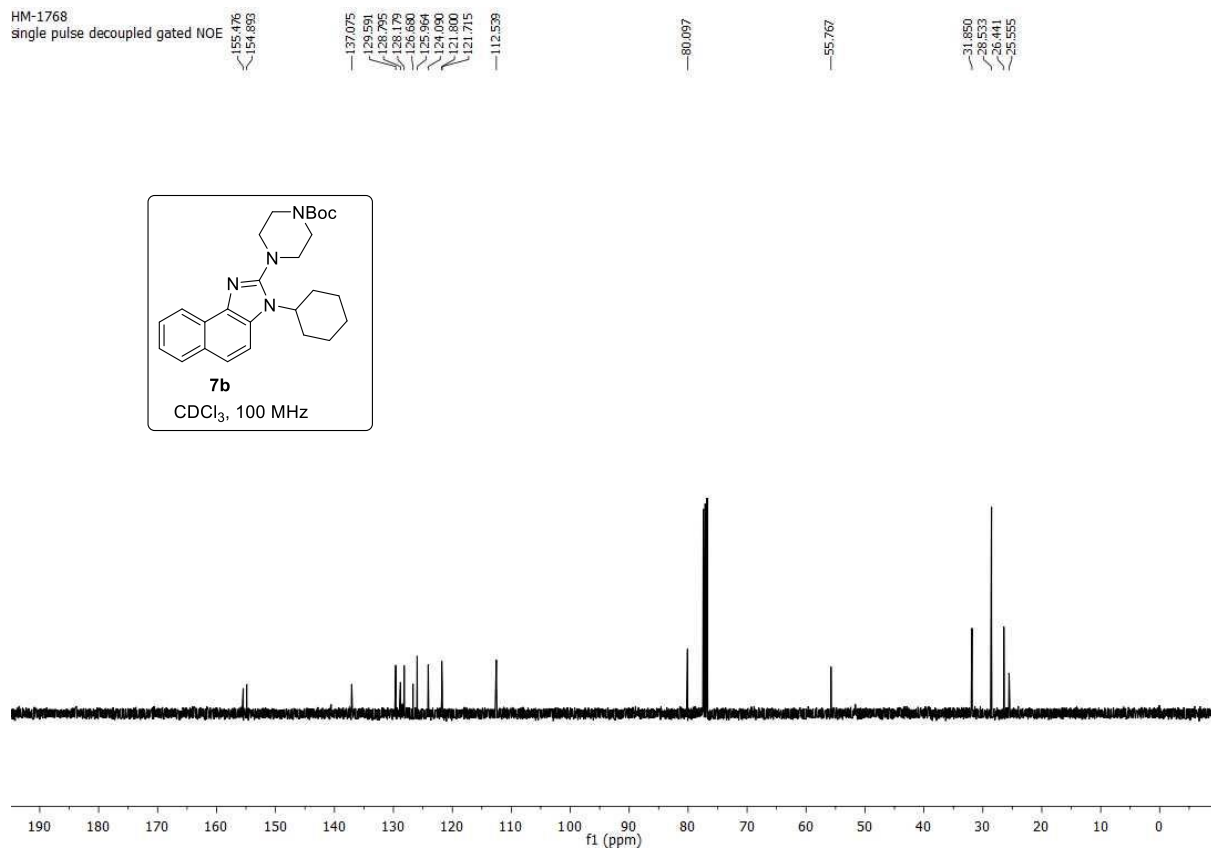

HM-1824  
single pulse

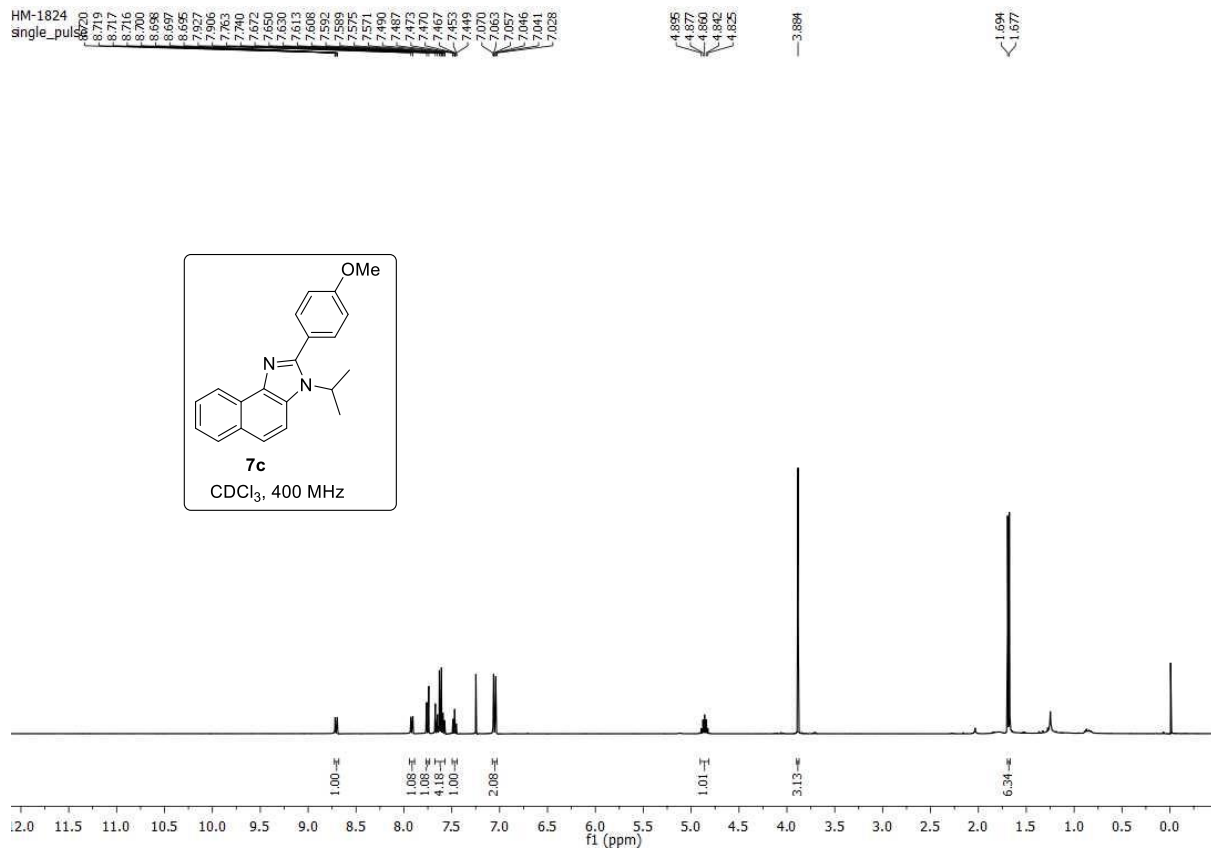



HM-1824

single pulse decoupled gated NOE

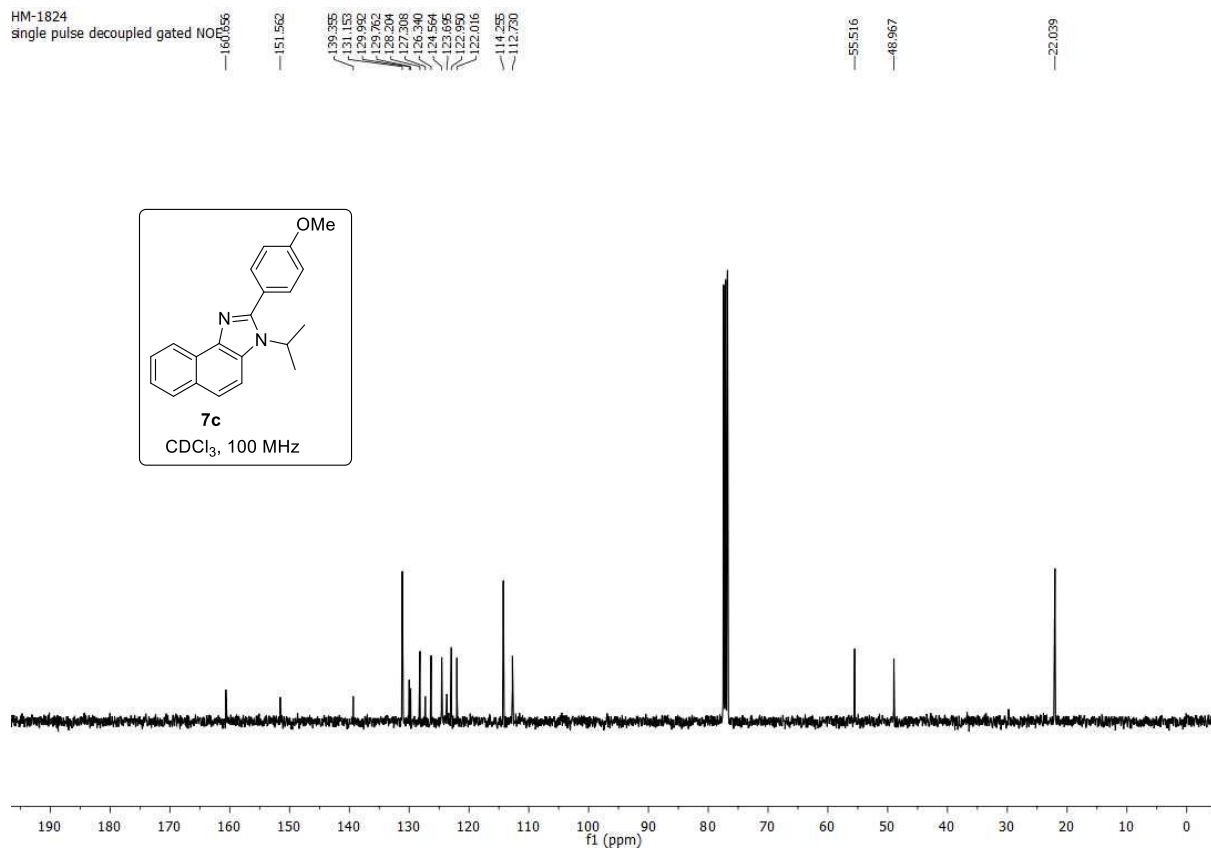

Supplement: d3cc00749a1.pdf [file d3cc00749a1.pdf]
